# Supplementary material for: A visible-light photoredox-catalyzed four-component reaction for the construction of sulfone-containing quinoxalin-2(1H)-ones
Source: Royal Society of Chemistry journal article supplement (doi:10.1039/d1qo00816a), 2021-01-01

## Supplementary Information

# Visible-light photoredox-catalyzed four component reaction for the construction of sulfone-containing quinoxalin-2(1H)-ones

YufenLv,<sup>a</sup> JinyunLuo,<sup>a</sup> MuzeLin,<sup>a</sup> HuilanYue,<sup>b\*</sup> Bin Dai<sup>a</sup> and Lin He<sup>a\*</sup>

<sup>a</sup> School of Chemistry and Chemical Engineering, Shihezi University, Xinjiang Uygur Autonomous Region, 832000, China

<sup>b</sup> Qinghai Provincial Key Laboratory of Tibetan Medicine Research and CAS Key Laboratory of Tibetan Medicine Research, Northwest Institute of Plateau Biology, Qinghai 810008, China

\*Corresponding author.

E-mail: hlyue@nwipb.cas.cn; helin@shzu.edu.cn

## Table of Contents

|                                                                                                                                              |         |
|----------------------------------------------------------------------------------------------------------------------------------------------|---------|
| 1. General information.....                                                                                                                  | S2      |
| 2. General procedure for visible-light photoredox-catalyzed four component reaction leading to sulfone-containing quinoxalin-2(1H)-ones..... | S3      |
| 3. Preliminary mechanistic studies .....                                                                                                     | S3-S5   |
| 4. Characterization data of products .....                                                                                                   | S6-S15  |
| 5. Copies of NMR and HRMS spectra.....                                                                                                       | S16-S61 |

## 1. General information

All commercially available reagent grade chemicals were purchased from Adamas, Strem, MERYER, Alfa Aesar and Energy Chemical Company and used as received without further purification unless otherwise stated.  $^1\text{H}$  NMR and  $^{13}\text{C}$  NMR were recorded in  $\text{CDCl}_3$  on a Bruker Avance III 500MHz or 400 MHz spectrometer with TMS as internal standard at room temperature, the chemical shifts ( $\delta$ ) were expressed in ppm and  $J$  values were given in Hz. The following abbreviations are used to indicate the multiplicity: singlet (s), doublet (d), triplet (t), quartet (q), doublet of doublets (dd), doublet of triplets (dt), and multiplet (m). All first order splitting patterns were assigned on the basis of the appearance of the multiplet. Splitting patterns that could not be easily interpreted were designated as multiplet (m). High-resolution mass spectra (HRMS) were obtained on an LTQ Orbitrap XL mass spectrometry equipped with an ESI source. Column chromatography was performed on silica gel (200-300 mesh).

## 2. General procedure for visible-light photoredox-catalyzed four component reaction leading to sulfone-containing quinoxalin-2(1H)-ones.

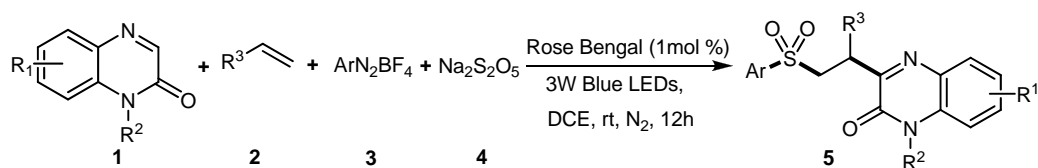

A mixture of quinoxalin-2(1H)-ones **1** (0.1mmol), aryldiazoniumtetrafluoroborate **3** (0.2mmol), Na<sub>2</sub>S<sub>2</sub>O<sub>5</sub> **4** (0.3mmol), and Rose Bengal (1 mol%), and DCE(2 mL) in a tube (20 mL). Then, the tube was filled with N<sub>2</sub>. Alkene **2** (0.2 mmol) and DCE (2 mL) was added in tube under nitrogen atmosphere. The reaction mixture was stirred and irradiated by 3 W blue LEDs at room temperature for 12h. After completion of the reaction, the reaction mixture was concentrated in vacuum. The residue was purified by flash column chromatography using a mixture of petroleum ether and ethyl acetate as eluent to give the desired product **5**.

## 3. Preliminary mechanistic studies

### 3.1 The addition of TEMPO in the model reaction system.

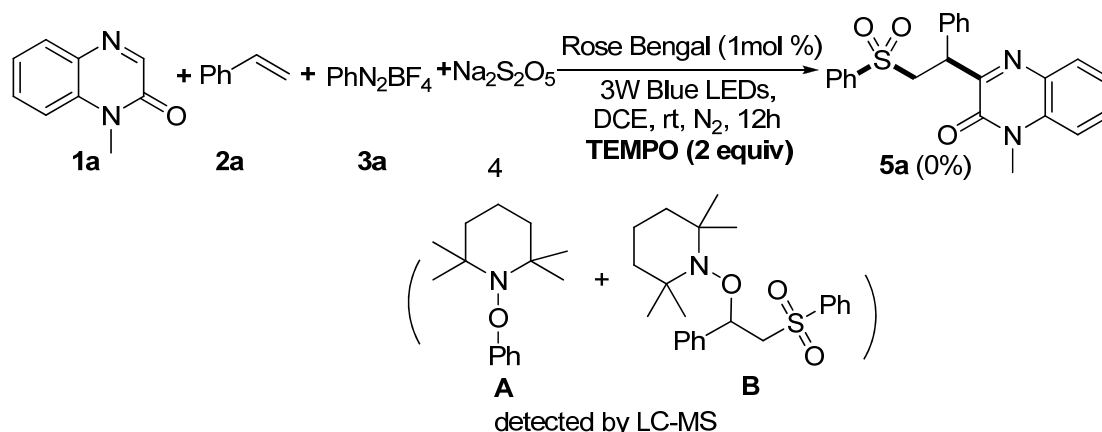

A mixture of 1-methylquinoxalin-2(1H)-one (**1a**), phenyldiazoniumtetrafluoroborate (**3a**), Na<sub>2</sub>S<sub>2</sub>O<sub>5</sub> (**4**), Rose Bengal (1 mol%), and TEMPO (0.2 mmol) in a 20mL tube. Then, the tube was filled with N<sub>2</sub>. Styrene **2a** (0.2 mmol) and DCE (2 mL) were added in tube under nitrogen atmosphere. The reaction mixture was stirred and irradiated by 3 W blue LEDs at room temperature for

12h. After completion of the reaction, the reaction mixture was concentrated in vacuum. None of the desired product **5a** was detected and TEMPO trapped complexes **A** and **B** were detected by LC-MS. The above result indicated that a radical process should be involved in this reaction.

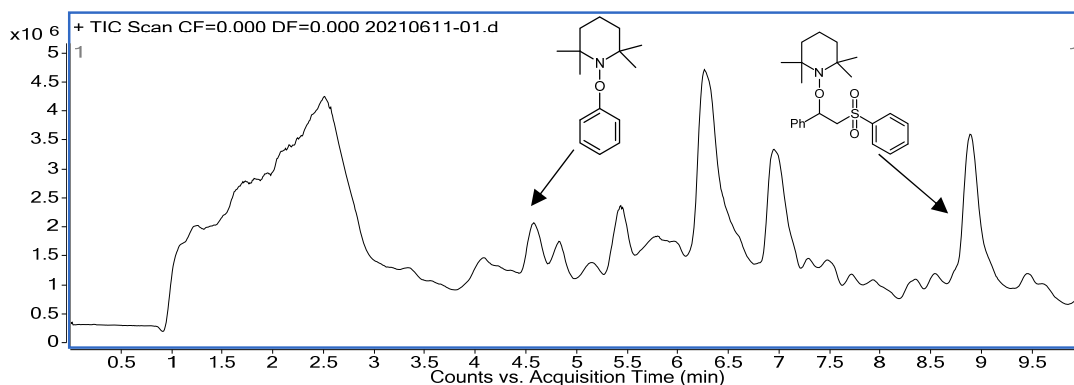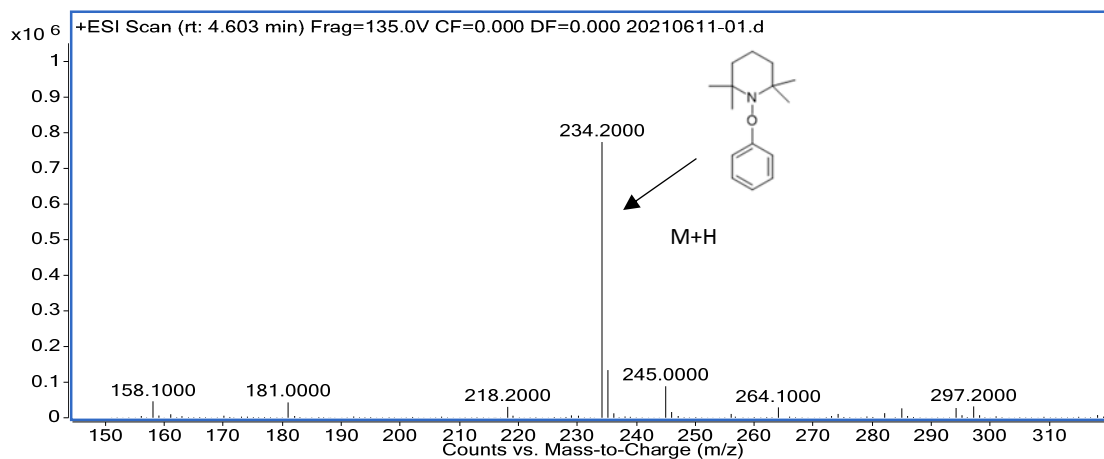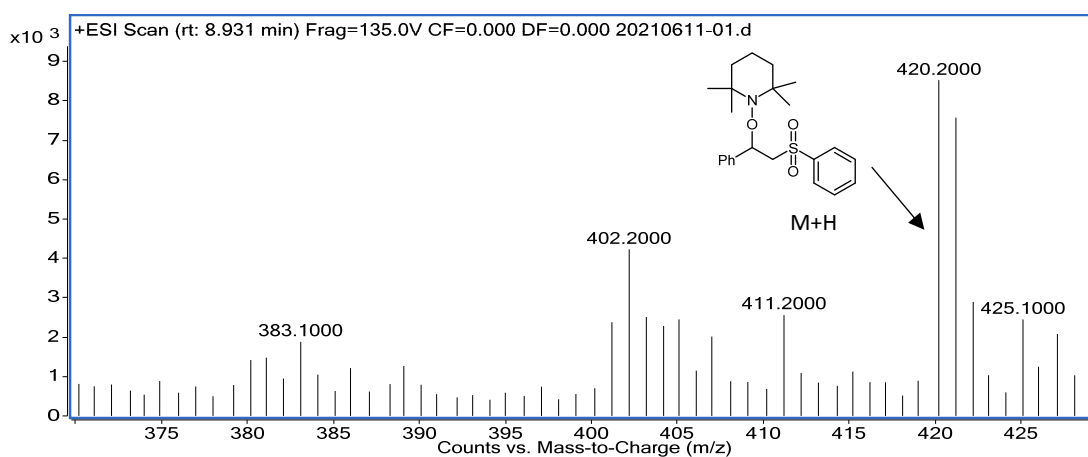

## 2. On/off experiments.

A mixture of 1-methylquinoxalin-2(1H)-one (**1a**),

phenyldiazoniumtetrafluoroborate (**3a**), Na<sub>2</sub>S<sub>2</sub>O<sub>5</sub> (**4**), and Rose Bengal (1 mol%) in a 20mL tube. Then, the tube was filled with N<sub>2</sub>. Styrene **2a** and DCE (2 mL) were added in tube under nitrogen atmosphere. The reaction mixture was stirred and irradiated by 3 W blue LEDs at room temperature under nitrogen atmosphere for 3h, the corresponding product was isolated in 36% yield. The reaction mixture was stirred and irradiated by 3 W blue LEDs at room temperature under nitrogen atmosphere for 3h, then the reaction mixture was continuously stirred in the dark for 3h, the desired product was obtained in 36.1% yield. Furthermore, when the reaction mixture was stirred and irradiated by 3 W blue LEDs at room temperature under nitrogen atmosphere for 6h, the desired product was isolated in 57% yield. Moreover, the reaction mixture was stirred and irradiated by 3 W blue LEDs at room temperature under nitrogen atmosphere for 6h, then the reaction mixture was continuously stirred in the dark for 3h, the desired product was obtained in 57% yield. The above results indicated that the continuous visible light irradiation is essential for promoting this transformation (Fig. S1).

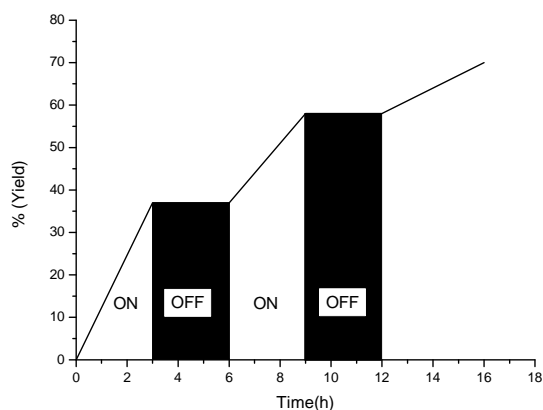

**Fig. S1** On/off experiments

#### 4. Characterization data of products

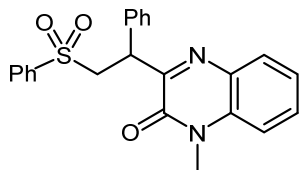

**1,6-dimethyl-3-(1-phenyl-2-(phenylsulfonyl)ethyl)-5-vinylpyrazin-2(1H)-one (5a)**,  $^1\text{H}$  NMR (500 MHz,  $\text{CDCl}_3$ ):  $\delta$  7.82 (d,  $J = 8.0$  Hz, 2H), 7.77 (d,  $J = 8.0$  Hz, 1H), 7.53 - 7.49(m, 1H), 7.38 - 7.30(m, 6H), 7.21 (t,  $J = 7.9$  Hz, 3H), 7.17 - 7.14 (m, 1H), 5.28 (dd,  $J_1 = 3.4$  Hz,  $J_2 = 10.0$  Hz, 1H), 4.79 (dd,  $J_1 = 10.0$  Hz,  $J_2 = 14.4$  Hz, 1H), 3.64 (dd,  $J_1 = 3.4$  Hz,  $J_2 = 14.4$  Hz, 1H), 3.57 (s, 3H);  $^{13}\text{C}$  NMR (125 MHz,  $\text{CDCl}_3$ ):  $\delta$  157.4, 153.9, 139.4, 138.4, 133.1, 133.0, 132.1, 130.3, 130.1, 128.8, 128.8, 128.3, 127.6, 123.6, 113.5, 59.3, 42.1, 29.1; ESI HRMS: calculated for  $\text{C}_{23}\text{H}_{21}\text{N}_2\text{O}_3\text{S}$   $[\text{M}+\text{H}]^+$  405.1273, found 405.1261.

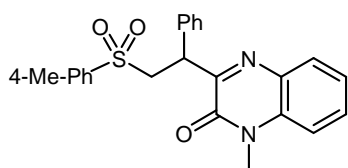

**1-methyl-3-(1-phenyl-2-(tosylethyl)quinoxalin-2(1H)-one (5b)**,  $^1\text{H}$  NMR(500 MHz,  $\text{CDCl}_3$ ):  $\delta$  7.74 (d,  $J = 8.0$  Hz, 1H), 7.68 (d,  $J = 8.0$  Hz, 2H), 7.47 (t,  $J = 7.8$  Hz, 1H), 7.34 - 7.30(m, 3H), 7.23 - 7.15 (m, 4H), 7.05 (d,  $J = 8.2$  Hz, 2H), 5.26 (dd,  $J_1 = 3.0$  Hz,  $J_2 = 10.2$  Hz, 1H), 4.78 (dd,  $J_1 = 10.0$  Hz,  $J_2 = 14.4$  Hz, 1H), 3.60 (dd,  $J_1 = 3.0$  Hz,  $J_2 = 14.4$  Hz, 1H), 3.56 (s, 3H), 2.17(s, 3H);  $^{13}\text{C}$  NMR (125 MHz,  $\text{CDCl}_3$ ):  $\delta$  157.4, 153.9, 144.2, 138.6, 136.3, 133.0, 132.1, 130.2, 130.0, 129.4, 128.8, 128.4, 128.3, 127.5, 123.5, 113.4, 59.4, 42.1, 29.1, 21.4; ESI HRMS: calculated for  $\text{C}_{24}\text{H}_{23}\text{N}_2\text{O}_3\text{S}$   $[\text{M}+\text{H}]^+$  419.1429, found 419.1438.

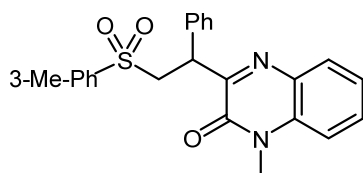

**1-methyl-3-(1-phenyl-2-(m-tolylsulfonyl)ethyl)quinoxalin-2(1H)-one (5c)**,  $^1\text{H}$  NMR(500 MHz,  $\text{CDCl}_3$ ):  $\delta$  7.76 - 7.74 (m, 1H), 7.62 (d,  $J = 7.8$  Hz, 1H), 7.55 (s, 1H), 7.52 - 7.49 (m, 1H), 7.34 (d,  $J = 7.3$  Hz, 2H), 7.33 - 7.30(m, 1H), 7.23 - 7.19 (m, 3H), 7.17 - 7.15 (m, 2H), 7.08 (d,  $J = 7.6$  Hz, 1H), 5.27 (dd,  $J_1 = 3.4$  Hz,  $J_2 = 10.0$  Hz, 1H), 4.78 (dd,  $J_1 = 10.2$  Hz,  $J_2 = 14.4$  Hz, 1H), 3.62 (dd,  $J_1 = 3.0$  Hz,  $J_2 = 14.4$  Hz, 1H), 3.55 (s, 3H), 2.18 (s, 3H);  $^{13}\text{C}$  NMR (125 MHz,  $\text{CDCl}_3$ ):  $\delta$  157.4, 153.8, 139.2, 139.0, 138.5, 133.8, 133.0, 132.1, 130.3, 130.0, 128.8, 128.7, 128.6, 128.3, 127.5, 125.5, 123.5, 113.4, 59.4, 42.2, 29.1, 21.0; ESI HRMS: calculated for  $\text{C}_{24}\text{H}_{23}\text{N}_2\text{O}_3\text{S}$   $[\text{M}+\text{H}]^+$  419.1429, found 419.1464.

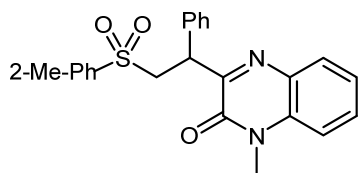

**1-methyl-3-(1-phenyl-2-(o-tolylsulfonyl)ethyl)quinoxalin-2(1H)-one (5d)**,  $^1\text{H NMR}$  (500 MHz,  $\text{CDCl}_3$ ):  $\delta$  7.89 - 7.87(m, 1H), 7.76 (d,  $J = 7.9$  Hz, 1H), 7.50 (t,  $J = 7.8$  Hz, 1H), 7.36 (d,  $J = 7.4$  Hz, 2H), 7.31 (t,  $J = 7.6$  Hz, 1H), 7.22 (t,  $J = 7.6$  Hz, 2H), 7.16 (t,  $J = 7.8$  Hz, 2H), 7.13 - 7.10 (m, 2H), 6.89 - 6.88 (m, 1H), 5.28 (dd,  $J_1 = 3.4$  Hz,  $J_2 = 10.0$  Hz, 1H), 4.88 (dd,  $J_1 = 10.0$  Hz,  $J_2 = 14.4$  Hz, 1H), 3.62 (dd,  $J_1 = 3.0$  Hz,  $J_2 = 14.4$  Hz, 1H), 3.59 (s, 3H), 2.67 (s, 3H);  $^{13}\text{C NMR}$  (125 MHz,  $\text{CDCl}_3$ ):  $\delta$  157.4, 153.7, 138.6, 138.5, 137.1, 133.1, 132.9, 132.2, 131.9, 130.5, 130.3, 129.8, 128.8, 128.3, 127.5, 126.0, 123.5, 113.5, 58.3, 42.0, 29.0, 20.5; ESI HRMS: calculated for  $\text{C}_{24}\text{H}_{22}\text{N}_2\text{NaO}_3\text{S}$   $[\text{M}+\text{Na}]^+$  441.1249, found 441.1283.

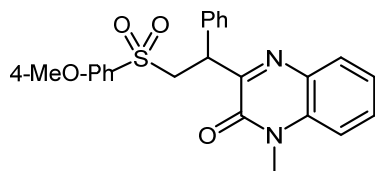

**3-(2-((4-methoxyphenyl)sulfonyl)-1-phenylethyl)-1-methylquinoxalin-2(1H)-one (5e)**,  $^1\text{H NMR}$  (400 MHz,  $\text{CDCl}_3$ ):  $\delta$  7.78 - 7.76 (m, 1H), 7.71 (d,  $J = 8.8$  Hz, 2H), 7.53 - 7.49(m, 1H), 7.35 - 7.30(m, 3H), 7.24 - 7.14(m, 4H), 6.69 (d,  $J = 8.8$  Hz, 2H), 5.27 (dd,  $J_1 = 3.4$  Hz,  $J_2 = 10.0$  Hz, 1H), 4.78 (dd,  $J_1 = 10.2$  Hz,  $J_2 = 14.4$  Hz, 1H), 3.64(s, 3H), 3.62 (dd,  $J_1 = 3.0$  Hz,  $J_2 = 14.4$  Hz, 1H), 3.56 (s, 3H);  $^{13}\text{C NMR}$  (100 MHz,  $\text{CDCl}_3$ ):  $\delta$  163.2, 157.5, 153.8, 138.6, 133.0, 132.2, 130.7, 130.6, 130.1, 130.0, 128.8, 128.3, 127.5, 123.5, 113.9, 113.4, 59.6, 55.4, 42.2, 29.0; ESI HRMS: calculated for  $\text{C}_{24}\text{H}_{23}\text{N}_2\text{O}_4\text{S}$   $[\text{M}+\text{H}]^+$  435.1379, found 435.1415.

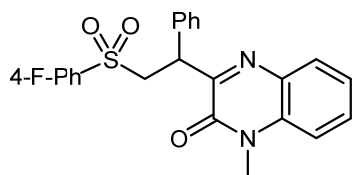

**3-(2-((4-fluorophenyl)sulfonyl)-1-phenylethyl)-1-methylquinoxalin-2(1H)-one (5f)**,  $^1\text{H NMR}$  (400 MHz,  $\text{CDCl}_3$ ):  $\delta$  7.82 - 7.77 (m, 3H), 7.55 - 7.51(m, 1H), 7.36 - 7.32(m, 3H), 7.23 - 7.16(m, 4H), 6.96 (t,  $J = 8.6$  Hz, 2H), 6.69 (d,  $J = 8.8$  Hz, 2H), 5.27 (dd,  $J_1 = 3.8$  Hz,  $J_2 = 10.0$  Hz, 1H), 4.75 (dd,  $J_1 = 10.0$  Hz,  $J_2 = 14.4$  Hz, 1H), 3.67 (dd,  $J_1 = 3.8$  Hz,  $J_2 = 14.4$  Hz, 1H), 3.58 (s, 3H);  $^{13}\text{C NMR}$  (100 MHz,  $\text{CDCl}_3$ ):  $\delta$  165.4 (d,  $J = 254.6$  Hz), 157.4, 153.8, 138.2, 135.4 (d,  $J = 3.2$  Hz), 133.0, 132.1, 131.2 (d,  $J = 9.5$  Hz), 130.5, 130.0, 128.8, 128.3, 127.6, 123.7, 116.0 (d,  $J = 22.5$  Hz), 113.6, 59.5, 42.1, 29.1; ESI HRMS: calculated for  $\text{C}_{23}\text{H}_{20}\text{FN}_2\text{O}_3\text{S}$   $[\text{M}+\text{H}]^+$  423.1179, found 423.1202.

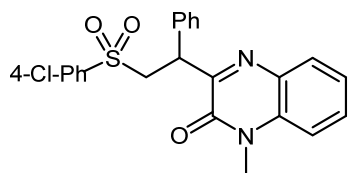

**3-(2-((4-chlorophenyl)sulfonyl)-1-phenylethyl)-1-methylquinoxalin-2(1H)-one**

**(5g)**,  $^1\text{H}$  NMR (400 MHz,  $\text{CDCl}_3$ ):  $\delta$  7.76 - 7.74 (m, 1H), 7.70 (d,  $J = 8.6$  Hz, 2H), 7.55 - 7.50 (m, 1H), 7.36 - 7.33 (m, 3H), 7.23 - 7.15 (m, 6H), 6.69 (d,  $J = 8.8$  Hz, 2H), 5.24 (dd,  $J_1 = 3.4$  Hz,  $J_2 = 10.0$  Hz, 1H), 4.76 (dd,  $J_1 = 10.2$  Hz,  $J_2 = 14.4$  Hz, 1H), 3.66 (dd,  $J_1 = 3.4$  Hz,  $J_2 = 14.4$  Hz, 1H), 3.57 (s, 3H);  $^{13}\text{C}$  NMR (100 MHz,  $\text{CDCl}_3$ ):  $\delta$  157.2, 153.7, 140.0, 138.2, 137.7, 133.0, 132.0, 130.5, 129.9, 129.0, 128.8, 128.3, 127.6, 123.7, 113.6, 59.5, 42.2, 29.1; ESI HRMS: calculated for  $\text{C}_{23}\text{H}_{20}\text{ClN}_2\text{O}_3\text{S}$   $[\text{M}+\text{H}]^+$  439.0883, found 439.0901.

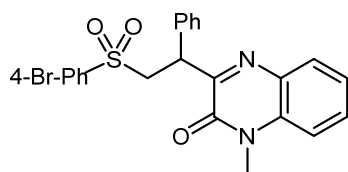

**3-(2-((4-bromophenyl)sulfonyl)-1-phenylethyl)-1-methylquinoxalin-2(1H)-one**

**(5h)**,  $^1\text{H}$  NMR (400 MHz,  $\text{CDCl}_3$ ):  $\delta$  7.76 - 7.74 (m, 1H), 7.63 (d,  $J = 8.6$  Hz, 2H), 7.56 - 7.51 (m, 1H), 7.38 - 7.33 (m, 5H), 7.24 - 7.17 (m, 4H), 6.69 (d,  $J = 8.8$  Hz, 2H), 5.24 (dd,  $J_1 = 3.4$  Hz,  $J_2 = 10.0$  Hz, 1H), 4.77 (dd,  $J_1 = 10.0$  Hz,  $J_2 = 14.4$  Hz, 1H), 3.64 (dd,  $J_1 = 3.4$  Hz,  $J_2 = 14.4$  Hz, 1H), 3.58 (s, 3H);  $^{13}\text{C}$  NMR (100 MHz,  $\text{CDCl}_3$ ):  $\delta$  157.2, 153.7, 138.2, 138.1, 132.9, 132.0, 130.5, 130.0, 129.9, 128.8, 128.6, 128.3, 127.6, 123.8, 113.7, 59.4, 42.2, 29.1; ESI HRMS: calculated for  $\text{C}_{23}\text{H}_{20}\text{BrN}_2\text{O}_3\text{S}$   $[\text{M}+\text{H}]^+$  483.0378, found 483.0412.

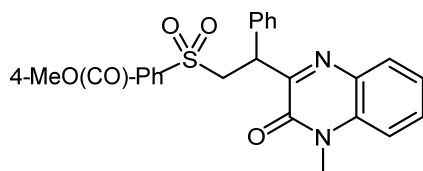

**Methyl 4-((2-((4-methyl-3-oxo-3,4-dihydroquinoxalin-2-yl)-2-phenylethyl)sulfonyl)**

**benzoate (5i)**,  $^1\text{H}$  NMR (400 MHz,  $\text{CDCl}_3$ ):  $\delta$  7.91 - 7.84 (m, 4H), 7.71 - 7.69 (m, 1), 7.51 - 7.47 (m, 1H), 7.34 - 7.29 (m, 3H), 7.23 - 7.14 (m, 4H), 5.28 (dd,  $J_1 = 3.4$  Hz,  $J_2 = 10.0$  Hz, 1H), 4.77 (dd,  $J_1 = 10.1$  Hz,  $J_2 = 14.4$  Hz, 1H), 3.89 (s, 3H), 3.67 (dd,  $J_1 = 3.4$  Hz,  $J_2 = 14.4$  Hz, 1H), 3.57 (s, 3H);  $^{13}\text{C}$  NMR (100 MHz,  $\text{CDCl}_3$ ):  $\delta$  165.2, 157.1, 153.8, 143.1, 138.1, 134.1, 132.9, 131.9, 130.3, 129.9, 129.9, 128.8, 128.4, 128.3, 127.7, 123.6, 113.5, 59.4, 52.5, 42.1, 29.1; ESI HRMS: calculated for  $\text{C}_{25}\text{H}_{23}\text{N}_2\text{O}_5\text{S}$   $[\text{M}+\text{H}]^+$  463.1328, found 463.1306.

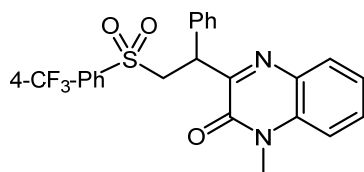



**1-methyl-3-(1-phenyl-2-((4-(trifluoromethyl)phenyl)sulfonyl)ethyl)quinoxalin-2(1H)-one (5j)**,  $^1\text{H}$  NMR (400 MHz,  $\text{CDCl}_3$ ):  $\delta$  7.90 (d,  $J = 8.2$  Hz, 2H), 7.72 - 7.70 (m, 1H), 7.54 - 7.49 (m, 3H), 7.34 - 7.31 (m, 3H), 7.22 - 7.16 (m, 4H), 5.28 (dd,  $J_1 = 3.4$  Hz,  $J_2 = 10.0$  Hz, 1H), 4.77 (dd,  $J_1 = 10.1$  Hz,  $J_2 = 14.4$  Hz, 1H), 3.73 (dd,  $J_1 = 3.4$  Hz,  $J_2 = 14.4$  Hz, 1H), 3.55 (s, 3H);  $^{13}\text{C}$  NMR (100 MHz,  $\text{CDCl}_3$ ):  $\delta$  157.0, 153.7, 142.8, 137.9, 134.7 (q,  $J = 33.9$  Hz), 132.9, 131.8, 130.6, 129.8, 129.0, 128.8, 128.3, 127.7, 125.8 (q,  $J = 3.6$  Hz), 123.8, 113.6, 59.3, 42.2, 29.0; ESI HRMS: calculated for  $\text{C}_{24}\text{H}_{23}\text{F}_3\text{N}_2\text{O}_3\text{S}$   $[\text{M}+\text{H}]^+$  473.1147, found 473.1150.

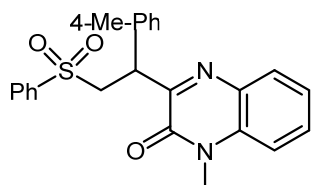

**1-methyl-3-(2-(phenylsulfonyl)-1-(p-tolyl)ethyl)quinoxalin-2(1H)-one (5k)**,  $^1\text{H}$  NMR (400 MHz,  $\text{CDCl}_3$ ):  $\delta$  7.82 - 7.80 (m, 2H), 7.77 - 7.75 (m, 1H), 7.52 - 7.48 (m, 1H), 7.38 - 7.29 (m, 4H), 7.20 (t,  $J = 8.3$  Hz, 3H), 7.01 (d,  $J = 8.0$  Hz, 2H), 5.24 (dd,  $J_1 = 3.4$  Hz,  $J_2 = 10.0$  Hz, 1H), 4.77 (dd,  $J_1 = 10.0$  Hz,  $J_2 = 14.4$  Hz, 1H), 3.63 (dd,  $J_1 = 3.4$  Hz,  $J_2 = 14.4$  Hz, 1H), 3.56 (s, 3H), 2.23 (s, 3H);  $^{13}\text{C}$  NMR (100 MHz,  $\text{CDCl}_3$ ):  $\delta$  157.5, 153.9, 139.4, 137.3, 135.4, 133.0, 132.1, 130.2, 130.0, 129.5, 128.8, 128.3, 128.2, 123.5, 113.5, 59.4, 41.8, 29.1, 21.0; ESI HRMS: calculated for  $\text{C}_{24}\text{H}_{23}\text{N}_2\text{O}_3\text{S}$   $[\text{M}+\text{H}]^+$  419.1429, found 419.1436.

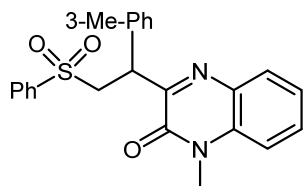

**1-methyl-3-(2-(phenylsulfonyl)-1-(m-tolyl)ethyl)quinoxalin-2(1H)-one (5l)**,  $^1\text{H}$  NMR (400 MHz,  $\text{CDCl}_3$ ):  $\delta$  7.82 - 7.76 (m, 3H), 7.53 - 7.49 (m, 1H), 7.38 - 7.29 (m, 4H), 7.20 (d,  $J = 8.2$  Hz, 1H), 7.13 - 7.07 (m, 3H), 6.96 (d,  $J = 7.0$  Hz, 1H), 5.24 (dd,  $J_1 = 3.4$  Hz,  $J_2 = 10.0$  Hz, 1H), 4.78 (dd,  $J_1 = 10.0$  Hz,  $J_2 = 14.4$  Hz, 1H), 3.63 (dd,  $J_1 = 3.4$  Hz,  $J_2 = 14.4$  Hz, 1H), 3.57 (s, 3H), 2.23 (s, 3H);  $^{13}\text{C}$  NMR (100 MHz,  $\text{CDCl}_3$ ):  $\delta$  157.5, 153.9, 139.4, 138.4, 138.3, 133.0, 133.0, 132.1, 130.2, 130.1, 129.0, 128.8, 128.6, 128.3, 125.3, 123.5, 113.5, 59.4, 42.0, 29.1, 21.4. ESI HRMS: calculated for  $\text{C}_{24}\text{H}_{23}\text{N}_2\text{O}_3\text{S}$   $[\text{M}+\text{H}]^+$  419.1429, found 419.1416.

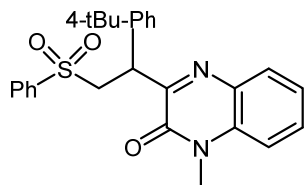

**3-(1-(4-(tert-butyl)phenyl)-2-(phenylsulfonyl)ethyl)-1,6-dimethyl-5-vinylpyrazin-2(1H)-one (5m)**,  $^1\text{H}$  NMR (400 MHz,  $\text{CDCl}_3$ ):  $\delta$  7.82 - 7.76 (m, 3H), 7.52 - 7.48 (m, 1H), 7.35 - 7.28 (m, 4H), 7.24 - 7.18 (m, 5H), 5.26 (dd,  $J_1 = 3.4$  Hz,  $J_2 = 10.0$  Hz, 1H), 4.78 (dd,  $J_1 = 10.0$  Hz,  $J_2 = 14.4$  Hz, 1H), 3.66 (dd,  $J_1 = 3.4$  Hz,  $J_2 = 14.4$  Hz, 1H), 3.57 (s, 3H), 1.22 (s, 9H);  $^{13}\text{C}$  NMR (100 MHz,  $\text{CDCl}_3$ ):  $\delta$  157.6, 153.9, 150.3, 139.4,

135.3, 133.0, 132.2, 130.2, 130.0, 128.8, 128.3, 127.9, 125.7, 123.5, 113.4, 59.3, 41.6, 34.4, 31.2, 29.1; ESI HRMS: calculated for C<sub>27</sub>H<sub>29</sub>N<sub>2</sub>O<sub>3</sub>S [M+H]<sup>+</sup> 461.1899, found 461.1967.

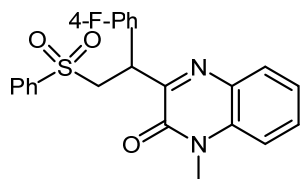

**3-(1-(4-fluorophenyl)-2-(phenylsulfonyl)ethyl)-1-methylquinoxalin-2(1H)-one**

**(5n)**, <sup>1</sup>H NMR (400 MHz, CDCl<sub>3</sub>): δ 7.81 - 7.76 (m, 3H), 7.55 - 7.51 (m, 1H), 7.40 - 7.28 (m, 6H), 7.22 (d, *J* = 8.3 Hz, 1H), 6.88 (t, *J* = 8.7 Hz, 2H), 5.27 (dd, *J*<sub>1</sub> = 4.1 Hz, *J*<sub>2</sub> = 10.0 Hz, 1H), 4.69 (dd, *J*<sub>1</sub> = 10.0 Hz, *J*<sub>2</sub> = 14.4 Hz, 1H), 3.65 (dd, *J*<sub>1</sub> = 4.1 Hz, *J*<sub>2</sub> = 14.4 Hz, 1H), 3.58 (s, 3H); <sup>13</sup>C NMR (100 MHz, CDCl<sub>3</sub>): δ 162.1 (d, *J* = 245.1 Hz), 157.3, 153.8, 139.3, 134.0 (d, *J* = 3.2 Hz), 133.1, 133.0, 132.1, 130.4, 130.0 (d, *J* = 9.3 Hz), 128.9, 128.3, 123.6, 115.6 (d, *J* = 21.4 Hz), 113.5, 59.3, 41.4, 29.1; ESI HRMS: calculated for C<sub>23</sub>H<sub>20</sub>FN<sub>2</sub>O<sub>3</sub>S [M+H]<sup>+</sup> 423.1179, found 423.1196.

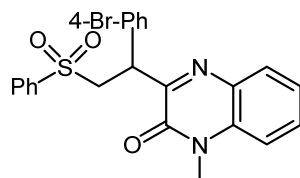

**3-(1-(4-bromophenyl)-2-(phenylsulfonyl)ethyl)-1-methylquinoxalin-2(1H)-one**

**(5o)**, <sup>1</sup>H NMR (400 MHz, CDCl<sub>3</sub>): δ 7.80 - 7.76 (m, 3H), 7.55 - 7.51 (m, 1H), 7.41 - 7.38 (m, 1H), 7.35 - 7.30 (m, 5H), 7.21 (t, *J* = 8.1 Hz, 3H), 5.24 (dd, *J*<sub>1</sub> = 4.3 Hz, *J*<sub>2</sub> = 9.2 Hz, 1H), 4.67 (dd, *J*<sub>1</sub> = 9.2 Hz, *J*<sub>2</sub> = 14.4 Hz, 1H), 3.66 (dd, *J*<sub>1</sub> = 4.3 Hz, *J*<sub>2</sub> = 14.4 Hz, 1H), 3.58 (s, 3H); <sup>13</sup>C NMR (100 MHz, CDCl<sub>3</sub>): δ 157.0, 153.8, 139.3, 137.3, 133.2, 133.0, 132.1, 131.8, 130.5, 130.1, 130.1, 128.9, 128.2, 123.7, 121.7, 113.6, 59.1, 41.7, 29.1; ESI HRMS: calculated for C<sub>23</sub>H<sub>20</sub>BrN<sub>2</sub>O<sub>3</sub>S [M+H]<sup>+</sup> 483.0378, found 483.0392.

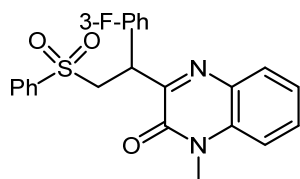

**3-(1-(3-fluorophenyl)-2-(phenylsulfonyl)ethyl)-1-methylquinoxalin-2(1H)-one**

**(5p)**, <sup>1</sup>H NMR (500 MHz, CDCl<sub>3</sub>): δ 7.81 (d, *J* = 7.3 Hz, 2H), 7.77 (d, *J* = 7.9 Hz, 1H), 7.53 (t, *J* = 7.8 Hz, 1H), 7.39 - 7.37 (m, 1H), 7.34 - 7.32 (m, 3H), 7.22 (d, *J* = 8.4 Hz, 1H), 7.19 - 7.13 (m, 2H), 7.01 (d, *J* = 9.8 Hz, 1H), 6.87 - 6.83 (m, 1H), 5.28 (dd, *J*<sub>1</sub> = 3.8 Hz, *J*<sub>2</sub> = 10.0 Hz, 1H), 4.71 (dd, *J*<sub>1</sub> = 10.0 Hz, *J*<sub>2</sub> = 14.4 Hz, 1H), 3.64 (dd, *J*<sub>1</sub> = 3.8 Hz, *J*<sub>2</sub> = 14.4 Hz, 1H), 3.58 (s, 3H); <sup>13</sup>C NMR (125 MHz, CDCl<sub>3</sub>): δ 162.8 (d, *J* = 245.3 Hz), 156.9, 153.8, 140.8 (d, *J* = 7.2 Hz), 139.2, 133.2, 133.1, 132.1, 130.6, 130.3 (d, *J* = 8.2 Hz), 130.1, 128.9, 128.3, 124.2 (d, *J* = 2.8 Hz), 123.7, 115.2 (d, *J* = 21.9 Hz), 114.6 (d, *J* = 20.9 Hz), 113.6, 59.2, 41.8, 29.2; ESI HRMS: calculated for C<sub>23</sub>H<sub>20</sub>FN<sub>2</sub>O<sub>3</sub>S [M+H]<sup>+</sup> 423.1179, found 423.1222.

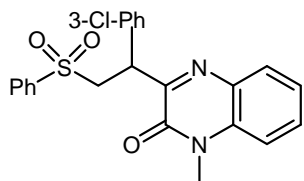

**3-(1-(3-chlorophenyl)-2-(phenylsulfonyl)ethyl)-1-methylquinoxalin-2(1H)-one (5q)**,  $^1\text{H}$  NMR (400 Hz,  $\text{CDCl}_3$ ):  $\delta$  7.81 - 7.78 (m, 3H), 7.53 (t,  $J = 7.3$  Hz, 2H), 7.39 - 7.32 (m, 4H), 7.26 - 7.21 (m, 3H), 7.17 - 7.11 (m, 2H), 5.25 (dd,  $J_1 = 4.1$  Hz,  $J_2 = 10.0$  Hz, 1H), 4.69 (dd,  $J_1 = 10.0$  Hz,  $J_2 = 14.4$  Hz, 1H), 3.65 (dd,  $J_1 = 4.1$  Hz,  $J_2 = 14.4$  Hz, 1H), 3.59 (s, 3H);  $^{13}\text{C}$  NMR (100 MHz,  $\text{CDCl}_3$ ):  $\delta$  156.9, 153.8, 140.3, 139.3, 134.5, 133.2, 132.1, 130.6, 130.2, 130.0, 128.9, 128.3, 128.3, 127.8, 126.8, 123.7, 113.6, 59.1, 41.8, 29.2; ESI HRMS: calculated for  $\text{C}_{23}\text{H}_{20}\text{ClN}_2\text{O}_3\text{S}$   $[\text{M}+\text{H}]^+$  439.0883, found 439.0920.

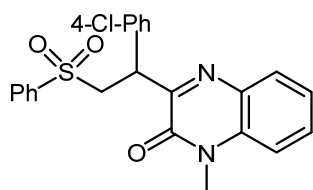

**3-(1-(4-chlorophenyl)-2-(phenylsulfonyl)ethyl)-1-methylquinoxalin-2(1H)-one (5r)**,  $^1\text{H}$  NMR (500 Hz,  $\text{CDCl}_3$ ):  $\delta$  7.79 - 7.75 (m, 3H), 7.54 - 7.51 (m, 1H), 7.40 - 7.37 (m, 1H), 7.34 - 7.31 (m, 3H), 7.26 (d,  $J = 8.5$  Hz, 2H), 7.21 (d,  $J = 8.4$  Hz, 1H), 7.16 (d,  $J = 8.5$  Hz, 2H), 5.25 (dd,  $J_1 = 4.3$  Hz,  $J_2 = 9.2$  Hz, 1H), 4.67 (dd,  $J_1 = 9.2$  Hz,  $J_2 = 14.4$  Hz, 1H), 3.66 (dd,  $J_1 = 4.3$  Hz,  $J_2 = 14.4$  Hz, 1H), 3.57 (s, 3H);  $^{13}\text{C}$  NMR (125 MHz,  $\text{CDCl}_3$ ):  $\delta$  157.1, 153.8, 139.3, 136.8, 133.5, 133.2, 133.0, 132.1, 130.5, 130.1, 129.8, 128.9, 128.9, 128.3, 123.7, 113.6, 59.2, 41.6, 29.2; ESI HRMS: calculated for  $\text{C}_{23}\text{H}_{20}\text{ClN}_2\text{O}_3\text{S}$   $[\text{M}+\text{H}]^+$  439.0883, found 439.0854.

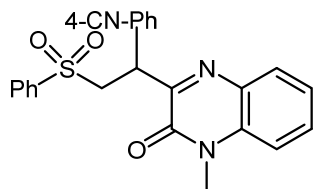

**4-(1-(4-methyl-3-oxo-3,4-dihydroquinoxalin-2-yl)-2-(phenylsulfonyl)ethyl)benzotrile (5s)**,  $^1\text{H}$  NMR (400 Hz,  $\text{CDCl}_3$ ):  $\delta$  7.81 - 7.77 (m, 3H), 7.58 - 7.54 (m, 1H), 7.51 - 7.45 (m, 4H), 7.44 - 7.40 (m, 1H), 7.37 - 7.33 (m, 3H), 7.24 (d,  $J = 8.5$  Hz, 1H), 5.33 (dd,  $J_1 = 4.7$  Hz,  $J_2 = 8.8$  Hz, 1H), 4.64 (dd,  $J_1 = 8.8$  Hz,  $J_2 = 14.4$  Hz, 1H), 3.69 (dd,  $J_1 = 4.7$  Hz,  $J_2 = 14.4$  Hz, 1H), 3.59 (s, 3H);  $^{13}\text{C}$  NMR (100 MHz,  $\text{CDCl}_3$ ):  $\delta$  156.4, 153.7, 143.6, 139.2, 133.4, 133.1, 132.5, 132.0, 130.9, 130.1, 129.3, 129.0, 128.2, 123.9, 118.5, 113.7, 111.5, 58.8, 42.3, 29.2; ESI HRMS: calculated for  $\text{C}_{24}\text{H}_{20}\text{N}_3\text{O}_3\text{S}$   $[\text{M}+\text{H}]^+$  430.1225, found 430.1237.

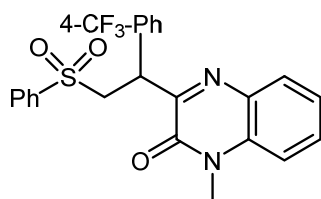

**1-methyl-3-(2-(phenylsulfonyl)-1-(4-trifluoromethyl)phenyl)ethyl)quinoxalin-2(1H)-one(5t),**  $^1\text{H}$  NMR (400Hz,  $\text{CDCl}_3$ ):  $\delta$  7.80 - 7.77 (m, 3H), 7.56 - 7.52 (m, 1H), 7.47 - 7.43 (m, 4H), 7.41 - 7.30 (m, 4H), 7.23 (d,  $J = 8.3$  Hz, 1H), 5.35 (dd,  $J_1 = 4.6$  Hz,  $J_2 = 8.9$  Hz, 1H), 4.68 (dd,  $J_1 = 8.9$  Hz,  $J_2 = 14.4$  Hz, 1H), 3.72 (dd,  $J_1 = 4.6$  Hz,  $J_2 = 14.4$  Hz, 1H), 3.59 (s, 3H);  $^{13}\text{C}$  NMR (100 MHz,  $\text{CDCl}_3$ ):  $\delta$  156.8, 153.8, 142.2, 139.2, 133.3, 133.1, 132.1, 130.7, 130.1, 129.8 (d,  $J = 32.3$  Hz), 128.9, 128.8, 128.2, 125.6 (q,  $J = 3.7$  Hz), 123.9 (d,  $J = 270.5$  Hz), 123.8, 113.6, 59.0, 42.1, 29.2; ESI HRMS: calculated for  $\text{C}_{24}\text{H}_{23}\text{F}_3\text{N}_2\text{O}_3\text{S}$   $[\text{M}+\text{H}]^+$  473.1147, found 473.1121.

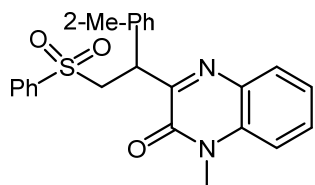

**1-methyl-3-(2-(phenylsulfonyl)-1-(o-tolyl)ethyl)quinoxalin-2(1H)-one(5u),**  $^1\text{H}$  NMR (400 Hz,  $\text{CDCl}_3$ ):  $\delta$  7.87 - 7.81 (m, 3H), 7.55 - 7.51 (m, 1H), 7.41 - 7.32 (m, 4H), 7.22 (d,  $J = 8.3$  Hz, 1H), 7.13 (d,  $J = 7.3$  Hz, 1H), 7.08 - 7.03 (m, 2H), 6.96 (t,  $J = 7.4$  Hz, 1H), 5.48 (dd,  $J_1 = 2.6$  Hz,  $J_2 = 10.3$  Hz, 1H), 4.79 (dd,  $J_1 = 10.3$  Hz,  $J_2 = 14.4$  Hz, 1H), 3.58 (s, 3H), 3.41 (dd,  $J_1 = 2.6$  Hz,  $J_2 = 14.4$  Hz, 1H), 2.48 (s, 3H);  $^{13}\text{C}$  NMR (100 MHz,  $\text{CDCl}_3$ ):  $\delta$  157.6, 154.1, 139.1, 136.9, 136.8, 133.1, 133.0, 132.0, 131.0, 130.3, 130.1, 128.9, 128.4, 127.4, 127.1, 126.1, 123.6, 113.5, 59.2, 37.4, 29.1, 19.5; ESI HRMS: calculated for  $\text{C}_{24}\text{H}_{23}\text{N}_2\text{O}_3\text{S}$   $[\text{M}+\text{H}]^+$  419.1429, found 419.1413.

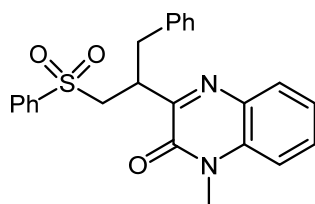

**1-methyl-3-(1-phenyl-3-(phenylsulfonyl)propan-2-yl)quinoxalin-2(1H)-one(5v),**  $^1\text{H}$  NMR (400 Hz,  $\text{CDCl}_3$ ):  $\delta$  7.77 - 7.74 (m, 1H), 7.70 - 7.68 (m, 2H), 7.56 - 7.52 (m, 1H), 7.39 - 7.31 (m, 2H), 7.30 - 7.24 (m, 3H), 7.19 - 7.15 (m, 3H), 7.08 - 7.06 (m, 2H), 4.33 - 4.27 (m, 1H), 4.25 - 4.21 (m, 1H), 3.64 (s, 3H), 3.28 (dd,  $J_1 = 1.8$  Hz,  $J_2 = 13.9$  Hz, 1H), 3.13 (dd,  $J_1 = 5.1$  Hz,  $J_2 = 13.9$  Hz, 1H), 2.69 (d,  $J_1 = 9.7$  Hz,  $J_2 = 13.9$  Hz, 1H);  $^{13}\text{C}$  NMR (100 MHz,  $\text{CDCl}_3$ ):  $\delta$  158.9, 154.1, 133.0, 132.9, 132.3, 130.3, 129.9, 129.1, 128.7, 128.6, 128.3, 126.7, 123.6, 113.5, 56.1, 39.0, 38.9, 29.1; ESI HRMS: calculated for  $\text{C}_{24}\text{H}_{23}\text{N}_2\text{O}_3\text{S}$   $[\text{M}+\text{H}]^+$  419.1429, found 419.1397.

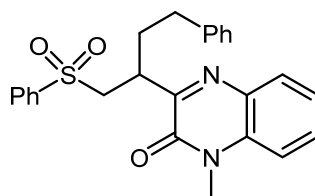

**1-methyl-3-(4-phenyl-1-(phenylsulfonyl)butan-2-yl)quinoxalin-2(1H)-one(5w),**  $^1\text{H}$  NMR (400 Hz,  $\text{CDCl}_3$ ):  $\delta$  7.81 - 7.79 (m, 2H), 7.76 - 7.74 (m, 1H), 7.55 - 7.50 (m, 1H), 7.41 - 7.37 (m, 1H), 7.32 (t,  $J = 7.4$  Hz, 3H), 7.21 (d,  $J = 8.4$  Hz, 1H), 7.15 (t,  $J = 7.2$  Hz, 2H), 7.09 - 7.07 (m, 1H), 7.04 (d,  $J = 8.2$  Hz, 2H), 4.31 (dd,  $J_1 = 10.0$  Hz,  $J_2 = 14.4$  Hz, 1H), 4.06 - 4.02 (m, 1H), 3.58 (s, 3H), 3.40 (dd,  $J_1 = 3.1$  Hz,  $J_2 = 14.4$  Hz, 1H), 2.68 - 2.60 (m, 1H), 2.53 - 2.46 (m, 1H), 2.23 - 2.15 (m, 1H), 2.02 - 1.93 (m, 1H);

$^{13}\text{C}$  NMR (100 MHz,  $\text{CDCl}_3$ ):  $\delta$  159.2, 154.2, 140.9, 139.1, 133.1, 133.0, 132.2, 130.2, 129.9, 128.8, 128.4, 128.3, 128.2, 125.9, 123.5, 113.4, 58.3, 37.5, 35.2, 33.1, 29.0; ESI HRMS: calculated for  $\text{C}_{25}\text{H}_{25}\text{N}_2\text{O}_3\text{S}$   $[\text{M}+\text{H}]^+$  433.1586, found 433.1580.

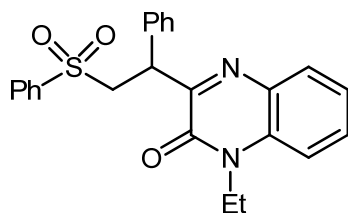

**1-ethyl-3-(1-phenyl-2-(phenylsulfonyl)ethyl)quinoxalin-2(1H)-one (5x)**,  $^1\text{H}$  NMR (500 Hz,  $\text{CDCl}_3$ ):  $\delta$  7.81 - 7.80 (m, 2H), 7.77 - 7.75 (m, 1H), 7.52 - 7.48 (m, 1H), 7.34 - 7.26 (m, 6H), 7.21 (t,  $J = 7.3$  Hz, 3H), 7.16 (t,  $J = 7.2$  Hz, 1H), 5.30 - 5.27 (m, 1H), 4.82 - 4.77 (m, 1H), 4.26 - 4.18 (m, 1H), 4.16 - 4.08 (m, 1H), 3.66 - 3.63 (m, 1H), 1.29 (t,  $J = 7.2$  Hz, 3H);  $^{13}\text{C}$  NMR (125 MHz,  $\text{CDCl}_3$ ):  $\delta$  157.4, 153.3, 139.3, 138.6, 133.1, 132.4, 131.9, 130.3, 130.3, 128.9, 128.8, 128.3, 127.5, 123.3, 113.3, 59.4, 42.0, 37.5, 12.3; ESI HRMS: calculated for  $\text{C}_{24}\text{H}_{23}\text{N}_2\text{O}_3\text{S}$   $[\text{M}+\text{H}]^+$  419.1429, found 429.1426.

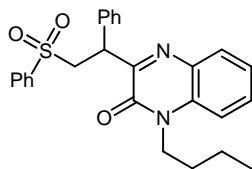

**1-butyl-3-(1-phenyl-2-(phenylsulfonyl)ethyl)quinoxalin-2(1H)-one (5y)**,  $^1\text{H}$  NMR (400 Hz,  $\text{CDCl}_3$ ):  $\delta$  7.95-7.89 (m, 1H), 7.82-7.79 (m, 2H), 7.76 (dd,  $J_1 = 1.3$  Hz,  $J_2 = 8.0$  Hz, 1H), 7.52-7.46 (m, 1H), 7.34 - 7.26 (m, 6H), 7.22-7.15 (m, 3H), 5.28 (dd,  $J_1 = 3.4$  Hz,  $J_2 = 10.0$  Hz, 1H), 4.78 (dd,  $J_1 = 10.0$  Hz,  $J_2 = 14.4$  Hz, 1H), 4.20-4.12 (m, 1H), 4.07-3.99 (m, 1H), 3.64 (dd,  $J_1 = 3.4$  Hz,  $J_2 = 14.4$  Hz, 1H), 1.69-1.61 (m, 2H), 1.47-1.40 (m, 2H), 0.97 (s, 3H);  $^{13}\text{C}$  NMR (100 MHz,  $\text{CDCl}_3$ ):  $\delta$  157.4, 153.6, 139.4, 138.6, 133.0, 132.4, 132.2, 130.3, 130.2, 128.9, 128.8, 128.8, 128.3, 127.4, 123.3, 113.5, 59.4, 42.3, 42.0, 29.2, 20.3, 13.8. ESI HRMS: calculated for  $\text{C}_{26}\text{H}_{27}\text{N}_2\text{O}_3\text{S}$   $[\text{M}+\text{H}]^+$  447.1742, found 447.1750.

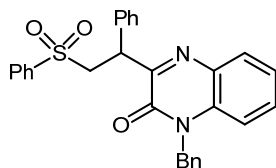

**1-benzyl-3-(1-phenyl-2-(phenylsulfonyl)ethyl)quinoxalin-2(1H)-one (5z)**,  $^1\text{H}$  NMR (400 Hz,  $\text{CDCl}_3$ ):  $\delta$  7.82 (d,  $J = 7.1$  Hz, 2H), 7.74 (dd,  $J_1 = 1.4$  Hz,  $J_2 = 8.0$  Hz, 1H), 7.38-7.33 (m, 3H), 7.26 - 7.23 (m, 9H), 7.18-7.15 (m, 4H), 5.46 (d,  $J = 15.6$  Hz, 1H), 5.35 (dd,  $J_1 = 3.4$  Hz,  $J_2 = 10.0$  Hz, 1H), 5.22 (d,  $J = 15.6$  Hz, 1H), 4.81 (dd,  $J_1 = 10.0$  Hz,  $J_2 = 14.4$  Hz, 1H), 3.66 (dd,  $J_1 = 3.4$  Hz,  $J_2 = 14.4$  Hz, 1H);  $^{13}\text{C}$  NMR (100 MHz,  $\text{CDCl}_3$ ):  $\delta$  157.6, 154.1, 139.4, 138.5, 135.1, 133.2, 132.4, 132.3, 130.3, 130.2, 128.9, 128.9, 128.8, 128.3, 127.8, 127.6, 127.0, 123.6, 114.3, 59.4, 46.0, 42.2. ESI HRMS: calculated for  $\text{C}_{29}\text{H}_{25}\text{N}_2\text{O}_3\text{S}$   $[\text{M}+\text{H}]^+$  481.1586, found 481.1595.

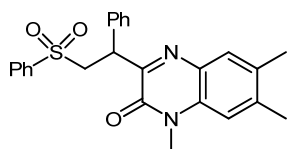

**1,6,7-trimethyl-3-(1-phenyl-2-(phenylsulfonyl)ethyl)quinoxalin-2(1H)-one(5a')**,  $^1\text{H}$  NMR (400 Hz,  $\text{CDCl}_3$ ):  $\delta$  7.82 - 7.80 (m, 2H), 7.54 (s, 1H), 7.39 - 7.36 (m, 1H), 7.34 - 7.30 (m, 4H), 7.21 - 7.14 (m, 3H), 6.96 (s, 1H), 5.24 (dd,  $J_1 = 3.7$  Hz,  $J_2 = 9.8$  Hz, 1H), 4.75 (dd,  $J_1 = 10.0$  Hz,  $J_2 = 14.4$  Hz, 1H), 3.64 (dd,  $J_1 = 3.7$  Hz,  $J_2 = 14.4$  Hz, 1H), 3.54 (s, 3H), 2.40 (s, 3H), 2.34 (s, 3H);  $^{13}\text{C}$  NMR (100 MHz,  $\text{CDCl}_3$ ):  $\delta$  156.1, 153.9, 140.1, 139.4, 138.7, 133.0, 132.4, 131.1, 130.6, 130.1, 128.8, 128.7, 128.3, 128.3, 127.4, 114.0, 59.4, 42.0, 29.0, 20.6, 19.1; ESI HRMS: calculated for  $\text{C}_{25}\text{H}_{25}\text{N}_2\text{O}_3\text{S}$   $[\text{M}+\text{H}]^+$  433.1586, found 433.1596.

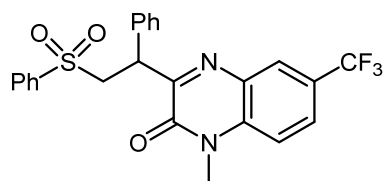

**1-methyl-3-(1-phenyl-2-(phenylsulfonyl)ethyl)-6-(trifluoromethyl)quinoxalin-2(1H)-one(5b')**,  $^1\text{H}$  NMR (400 Hz,  $\text{CDCl}_3$ ):  $\delta$  8.04 (s, 1H), 7.84 - 7.82 (m, 2H), 7.75 - 7.72 (m, 1H), 7.44 - 7.30 (m, 6H), 7.25 - 7.15 (m, 4H), 5.31 (dd,  $J_1 = 3.2$  Hz,  $J_2 = 10.4$  Hz, 1H), 4.75 (dd,  $J_1 = 10.4$  Hz,  $J_2 = 14.4$  Hz, 1H), 3.64 (dd,  $J_1 = 3.2$  Hz,  $J_2 = 14.4$  Hz, 1H), 3.62 (s, 3H);  $^{13}\text{C}$  NMR (100 MHz,  $\text{CDCl}_3$ ):  $\delta$  159.4, 153.8, 139.5, 137.8, 135.4, 133.3, 131.4, 128.9 (q,  $J = 9.9$  Hz), 128.3, 128.3, 127.8, 127.5, 127.4 (q,  $J = 3.8$  Hz), 126.6 (q,  $J = 3.4$  Hz), 125.8 (q,  $J = 45.6$  Hz), 122.3, 114.2, 59.2, 42.1, 29.4; ESI HRMS: calculated for  $\text{C}_{24}\text{H}_{23}\text{F}_3\text{N}_2\text{O}_3\text{S}$   $[\text{M}+\text{H}]^+$  473.1147, found 473.1177.

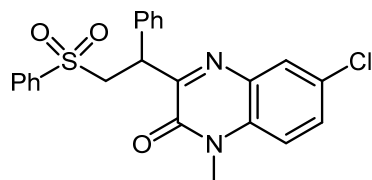

**6-chloro-1-methyl-3-(1-phenyl-2-(phenylsulfonyl)ethyl)quinoxalin-2(1H)-one(5c')**,  $^1\text{H}$  NMR (400 Hz,  $\text{CDCl}_3$ ):  $\delta$  7.81 (d,  $J = 7.4$  Hz, 2H), 7.68 (d,  $J = 8.4$  Hz, 1H), 7.46 - 7.28 (m, 6H), 7.23-7.15 (m, 4H), 5.25 (d,  $J = 9.9$  Hz, 1H), 4.77 - 4.71 (dd,  $J_1 = 10.5$  Hz,  $J_2 = 14.4$  Hz, 1H), 3.62 (d,  $J = 14.4$  Hz, 1H), 3.53 (s, 3H);  $^{13}\text{C}$  NMR (100 MHz,  $\text{CDCl}_3$ ):  $\delta$  157.6, 153.6, 139.3, 138.2, 136.3, 133.9, 133.2, 131.1, 130.6, 128.9, 128.8, 128.3, 128.3, 127.7, 124.0, 113.6, 59.2, 42.0, 29.3. ESI HRMS: calculated for  $\text{C}_{23}\text{H}_{20}\text{ClN}_2\text{O}_3\text{S}$   $[\text{M}+\text{H}]^+$  439.0883, found 439.0883.

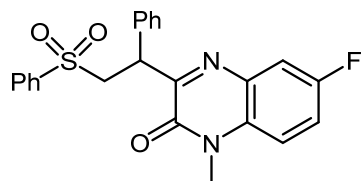

**6-fluoro-1-methyl-3-(1-phenyl-2-(phenylsulfonyl)ethyl)quinoxalin-2(1H)-one(5d')**,  $^1\text{H}$  NMR (400 Hz,  $\text{CDCl}_3$ ):  $\delta$  7.84 - 7.82 (m, 2H), 7.49 - 7.46 (m, 1H), 7.41 - 7.31 (m, 5H), 7.27 - 7.15 (m, 5H), 5.29 (dd,  $J_1 = 3.3$  Hz,  $J_2 = 10.2$  Hz, 1H), 4.75 (dd,  $J_1 = 10.2$

Hz,  $J_2 = 14.4$  Hz, 1H), 3.63 (dd,  $J_1 = 3.3$  Hz,  $J_2 = 14.4$  Hz, 1H), 3.58 (s, 3H);  $^{13}\text{C}$  NMR (100 MHz,  $\text{CDCl}_3$ ):  $\delta$  159.1, 158.6 (d,  $J = 242.5$  Hz), 153.6, 139.4, 138.1, 133.2, 132.6 (d,  $J = 11.2$  Hz), 129.7 (d,  $J = 2.0$  Hz), 128.9, 128.8, 128.3, 128.3, 127.7, 118.0 (d,  $J = 23.8$  Hz), 115.4 (d,  $J = 22.3$  Hz), 114.6 (d,  $J = 8.7$  Hz), 59.2, 42.1, 29.4; ESI HRMS: calculated for  $\text{C}_{23}\text{H}_{20}\text{FN}_2\text{O}_3\text{S}$   $[\text{M}+\text{H}]^+$  423.1179, found 423.1186.

## 5. Copies of NMR and HRMS spectra

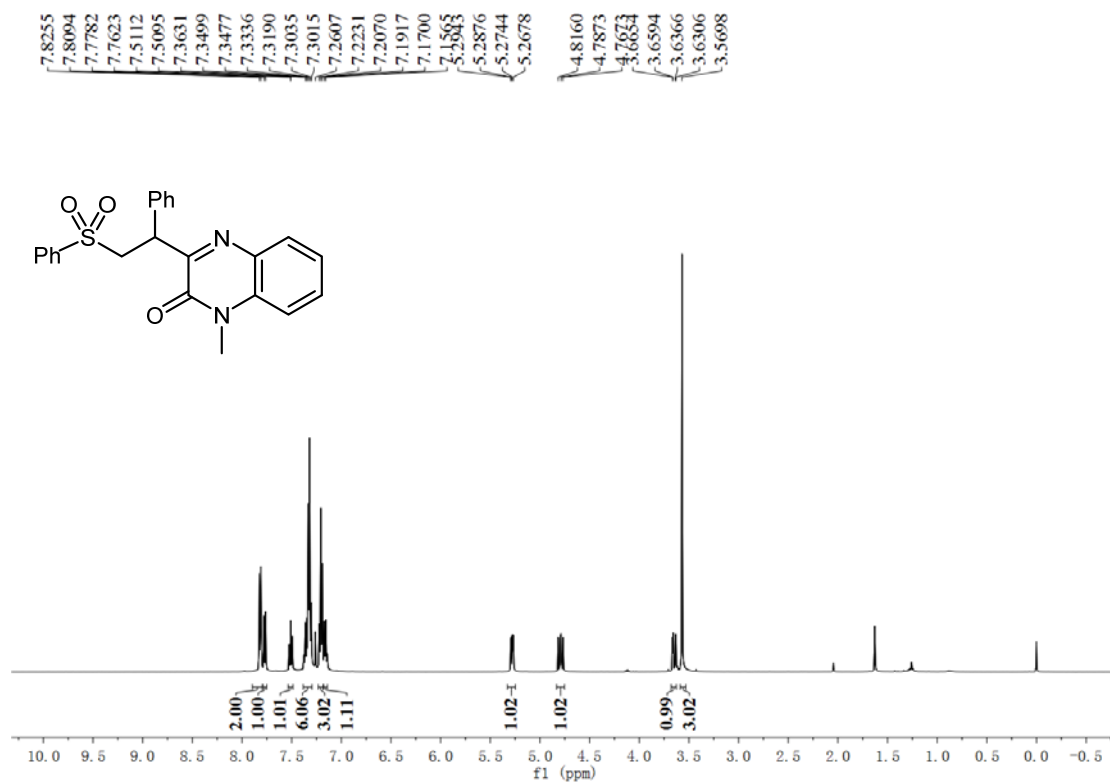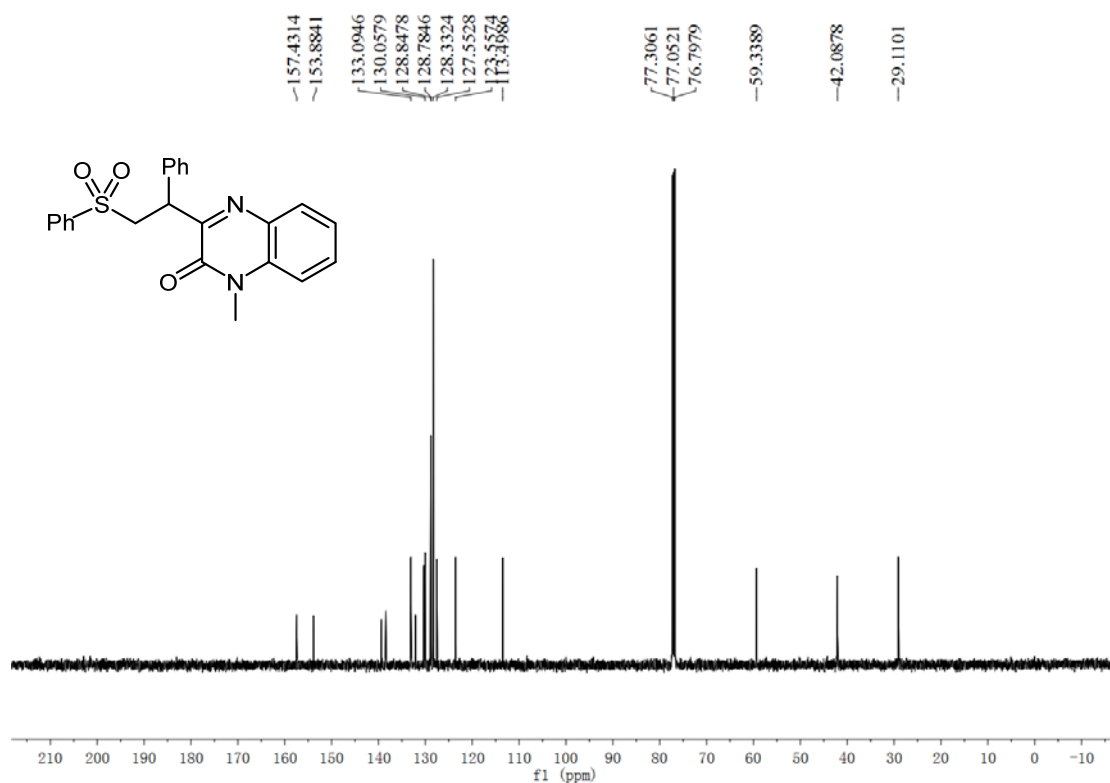



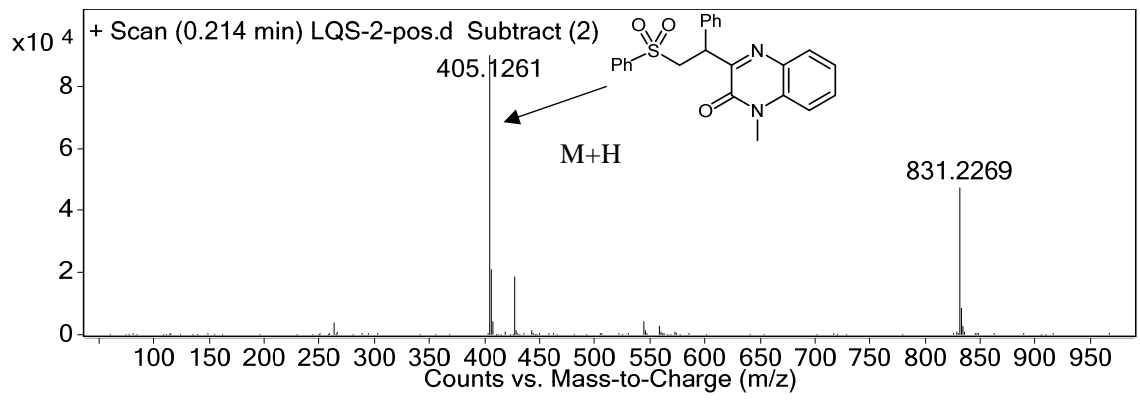

7.7469  
7.7310  
7.6843  
7.6682  
7.4926  
7.4778  
7.3430  
7.3285  
7.3152  
7.3001  
7.2588  
7.2282  
7.2136  
7.1983  
7.1817  
7.1735  
7.1594  
7.0627  
7.0464  
5.2762  
5.2703  
5.2557  
5.2497  
4.8013  
4.7807  
4.7727  
4.7521  
3.6092  
3.6032  
3.5805  
3.5744  
3.5608  
-2.1662

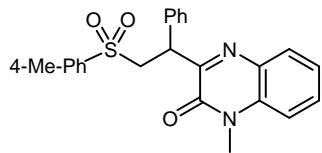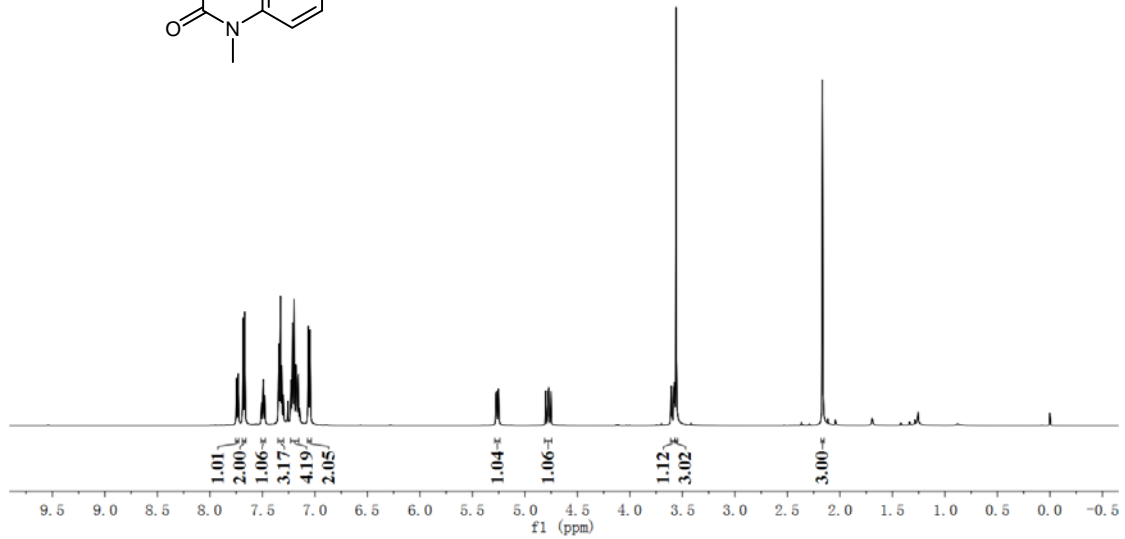

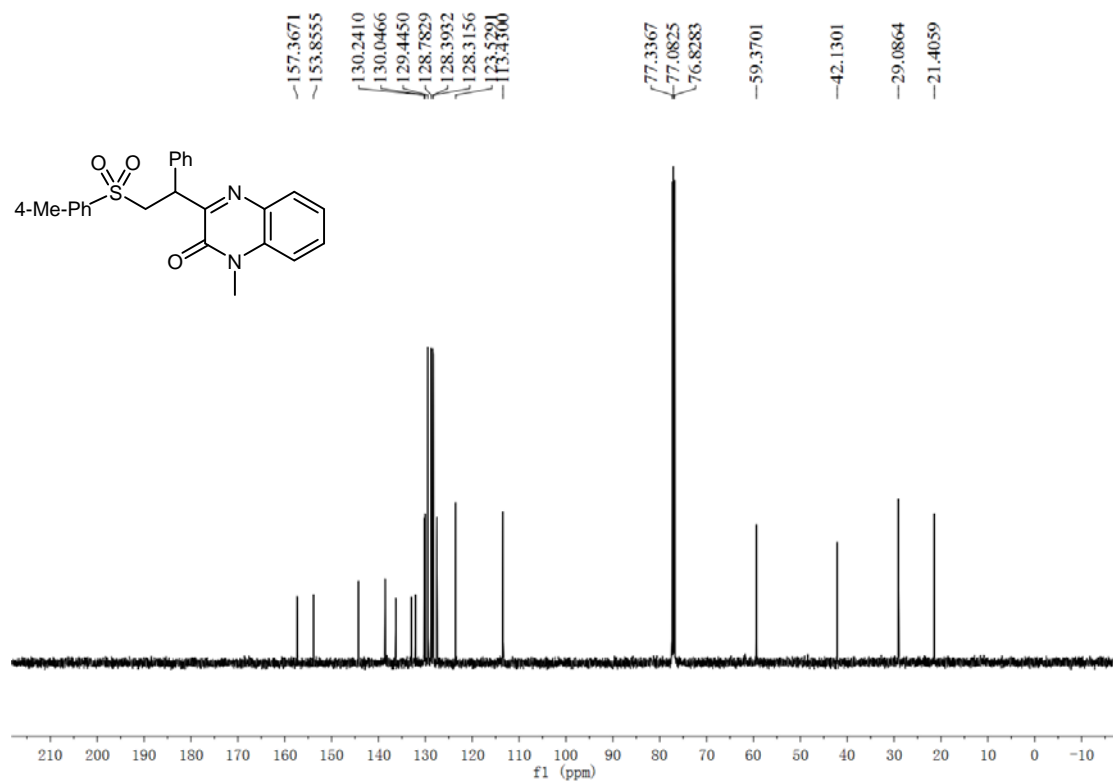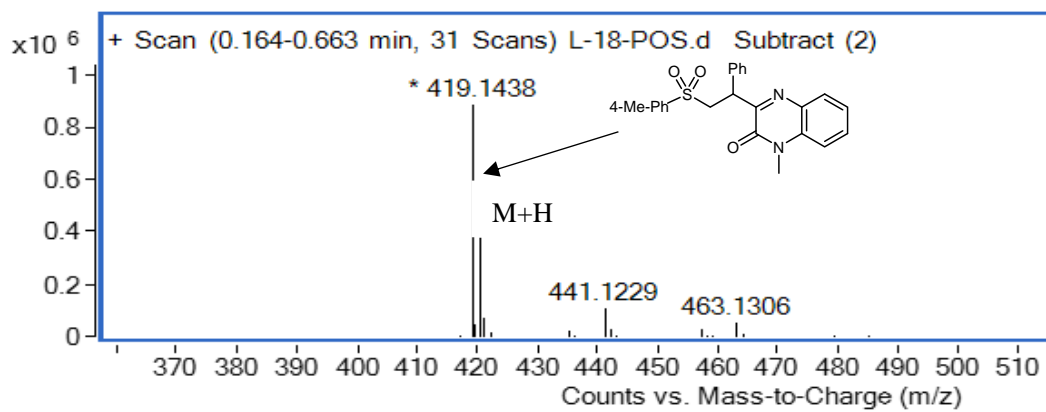

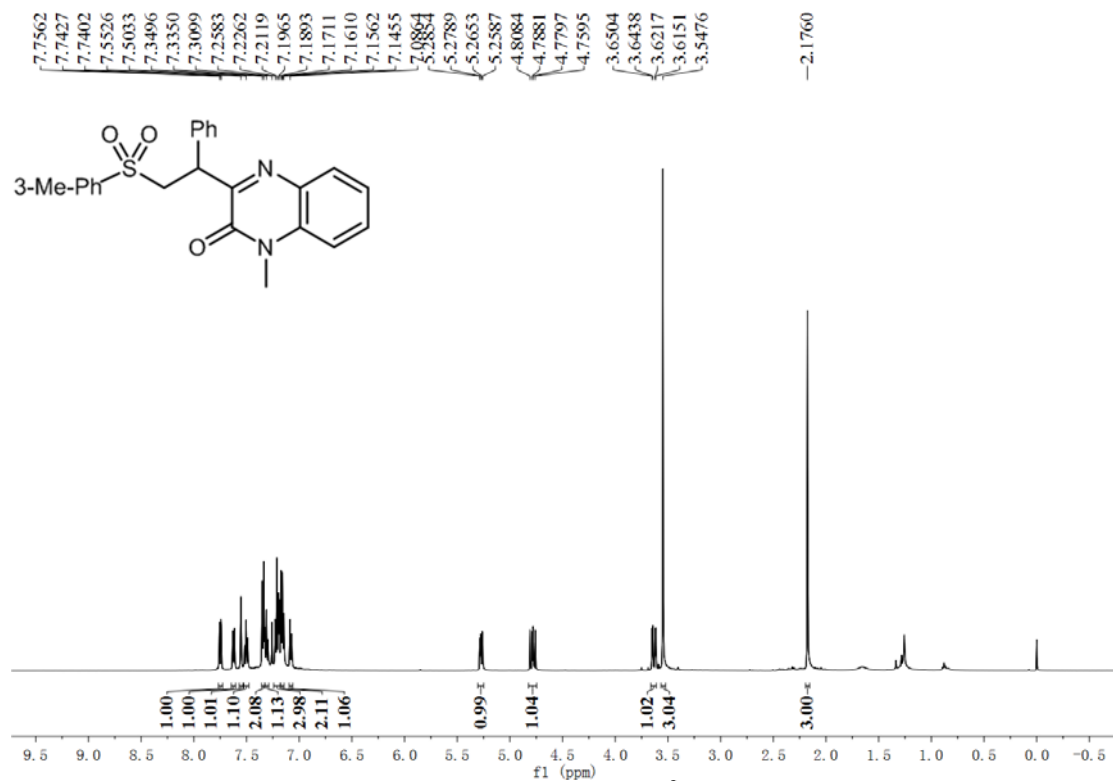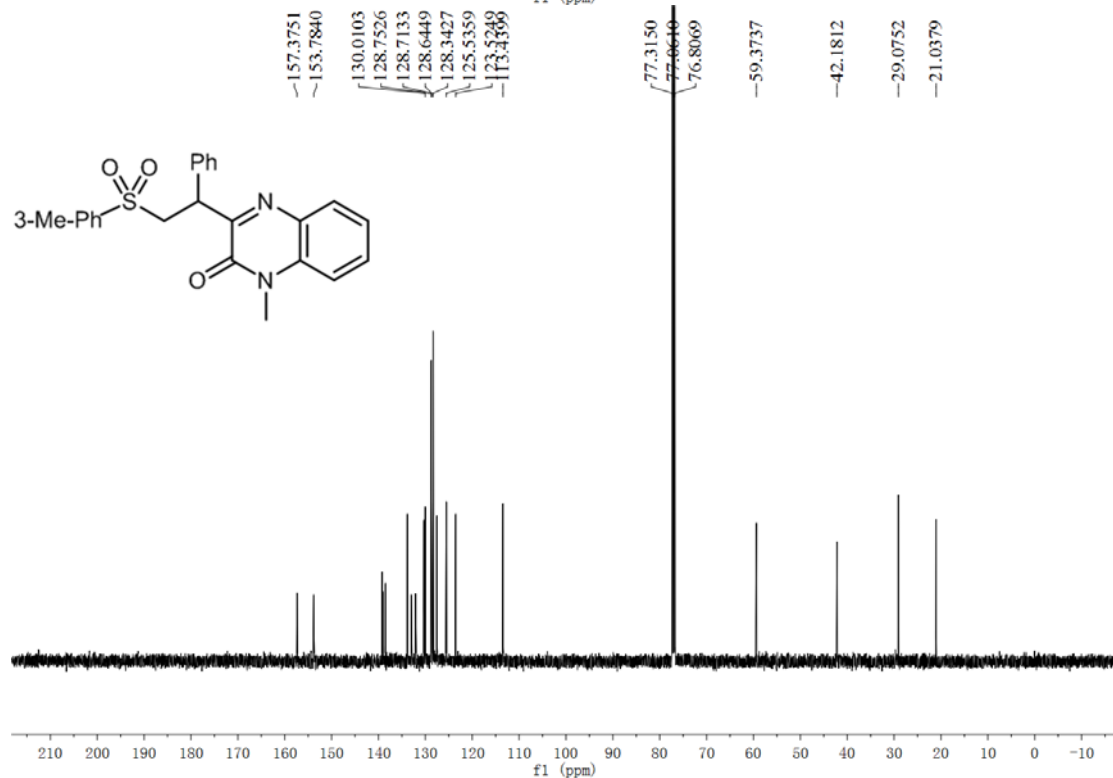

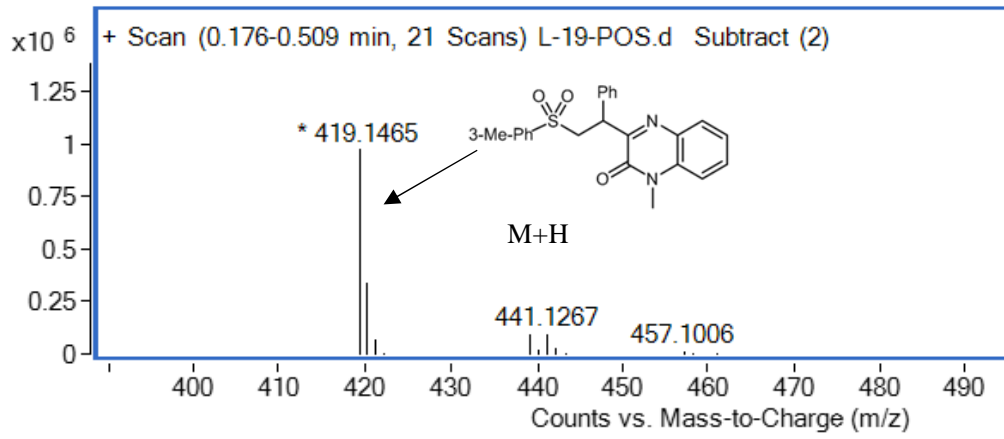

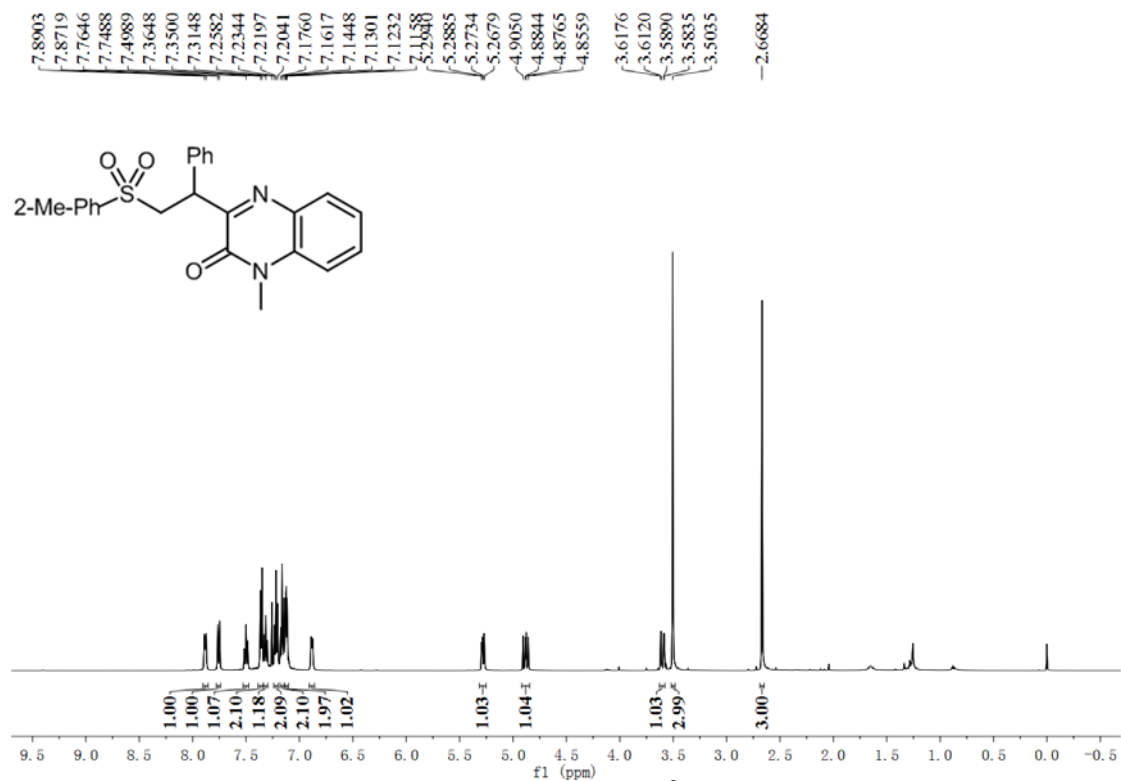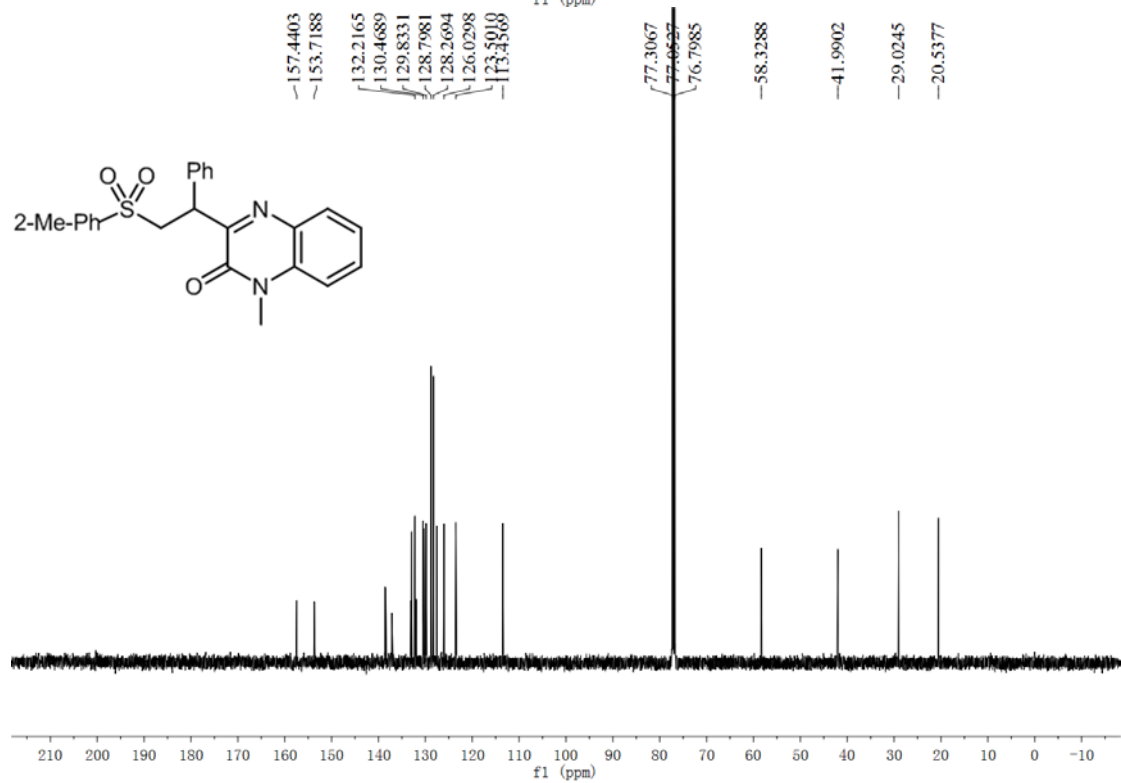

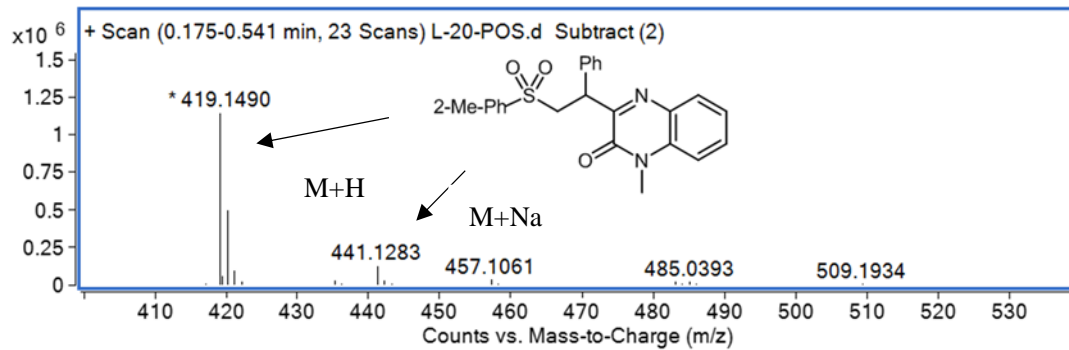

7.7799, 7.7772, 7.7600, 7.7573, 7.7256, 7.7035, 7.5085, 7.4906, 7.3526, 7.3352, 7.3198, 7.2593, 7.2365, 7.2189, 7.1999, 7.1782, 7.1699, 6.6838, 5.2591, 5.2519, 5.2333, 5.2260, 4.8115, 4.7856, 4.7759, 4.7500, 3.6409, 3.6128, 3.6053, 3.5772, 3.5695, 3.5568

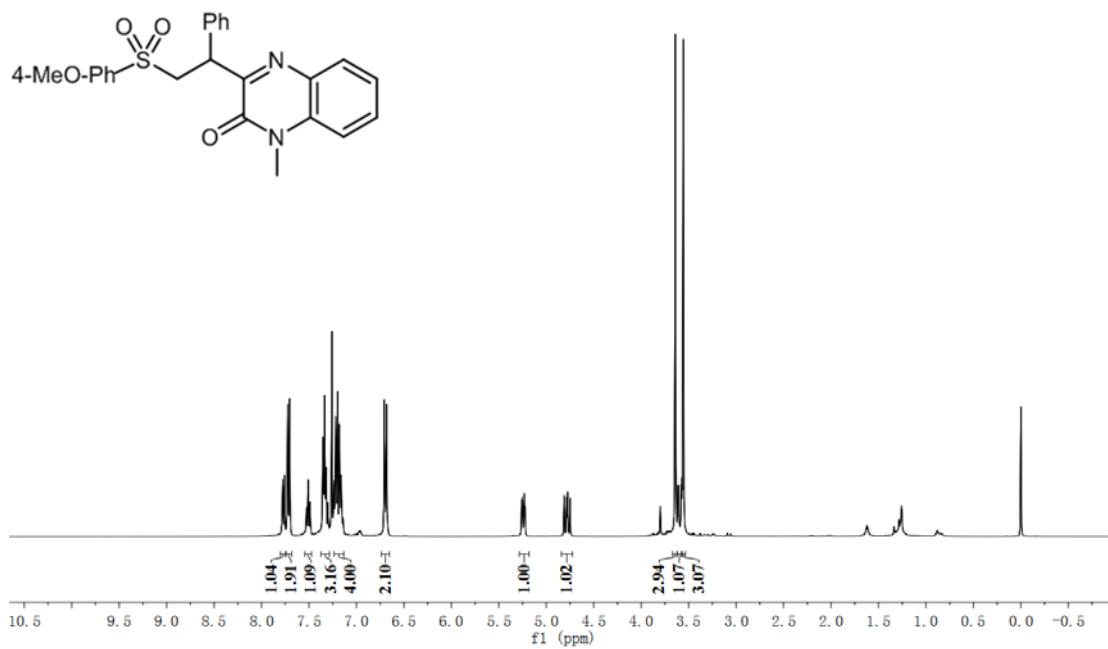

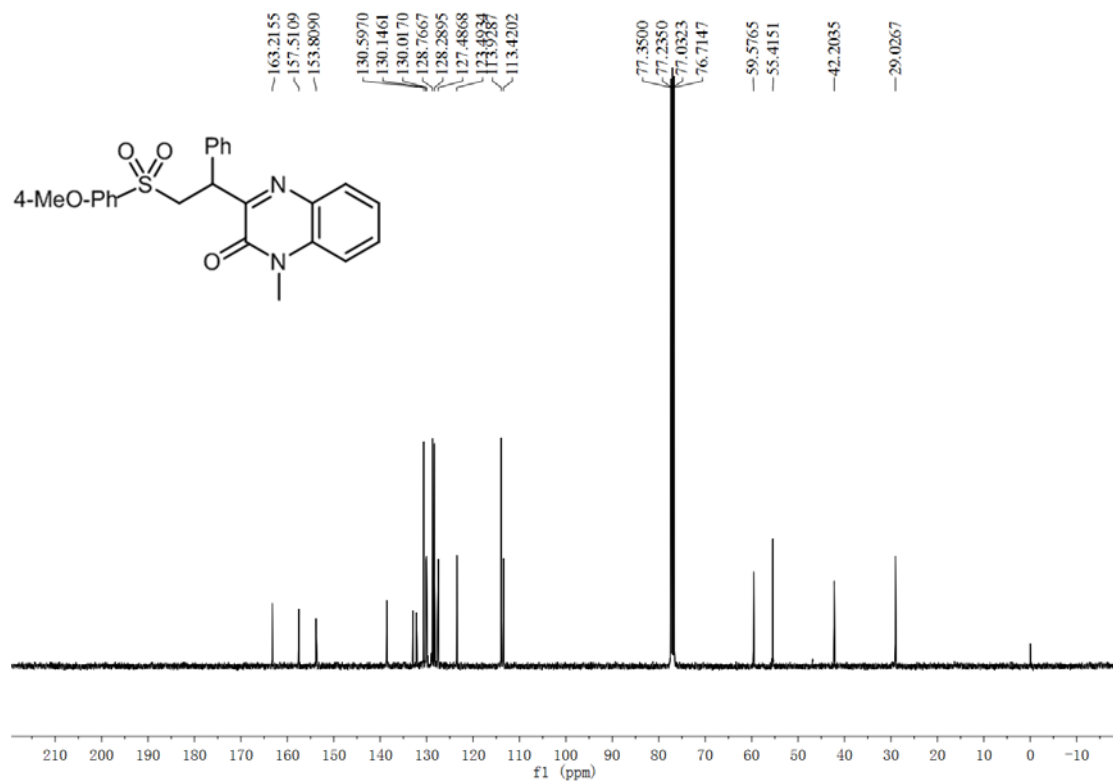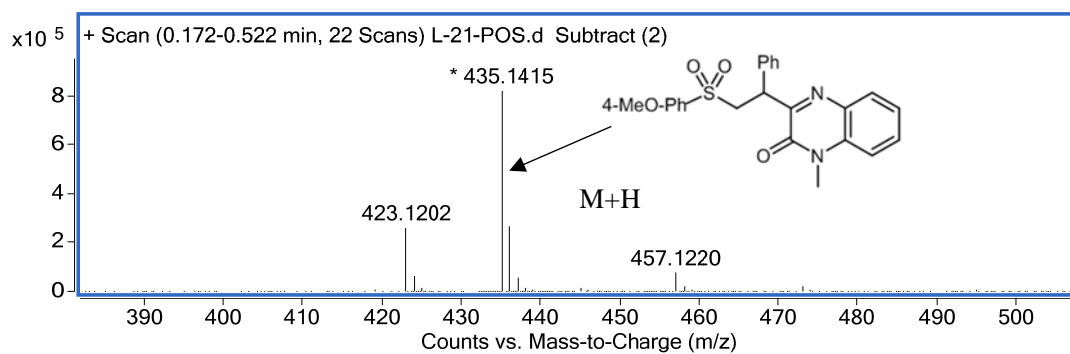

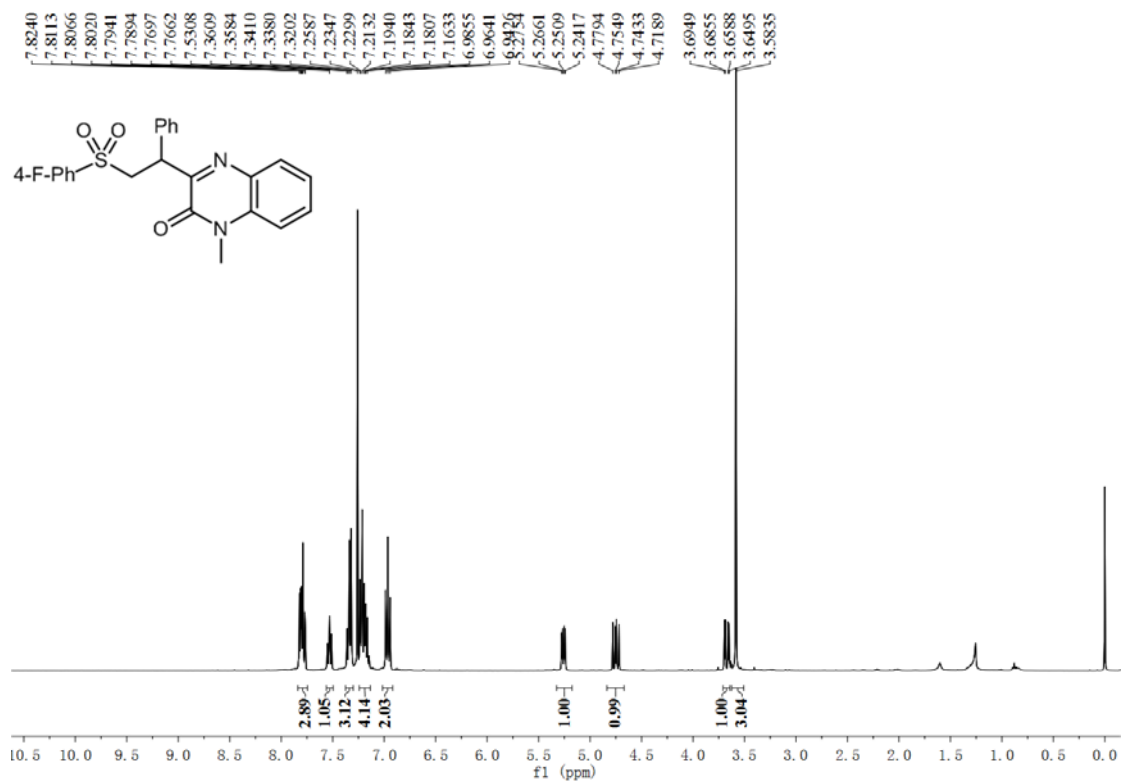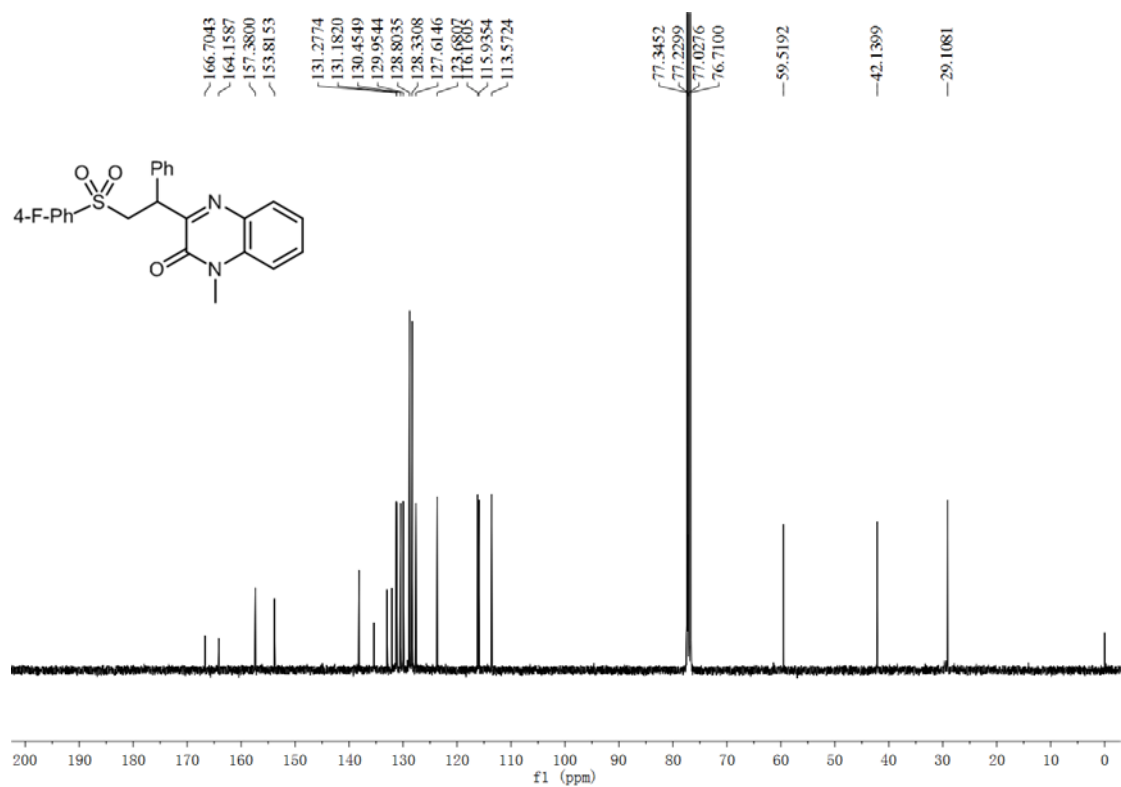



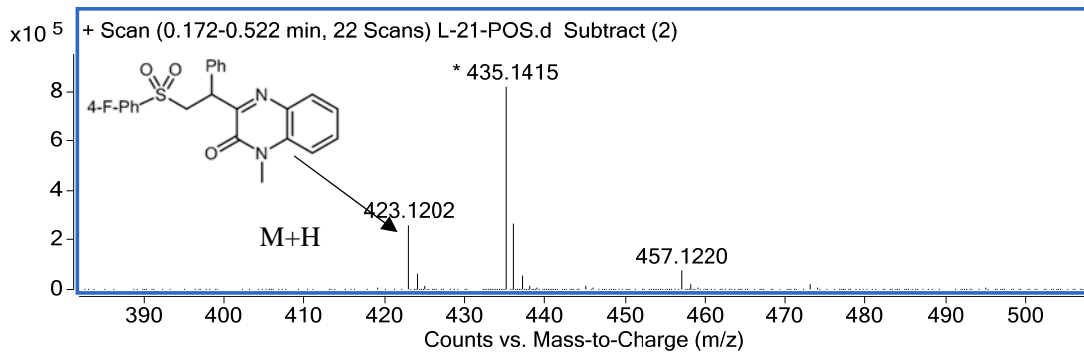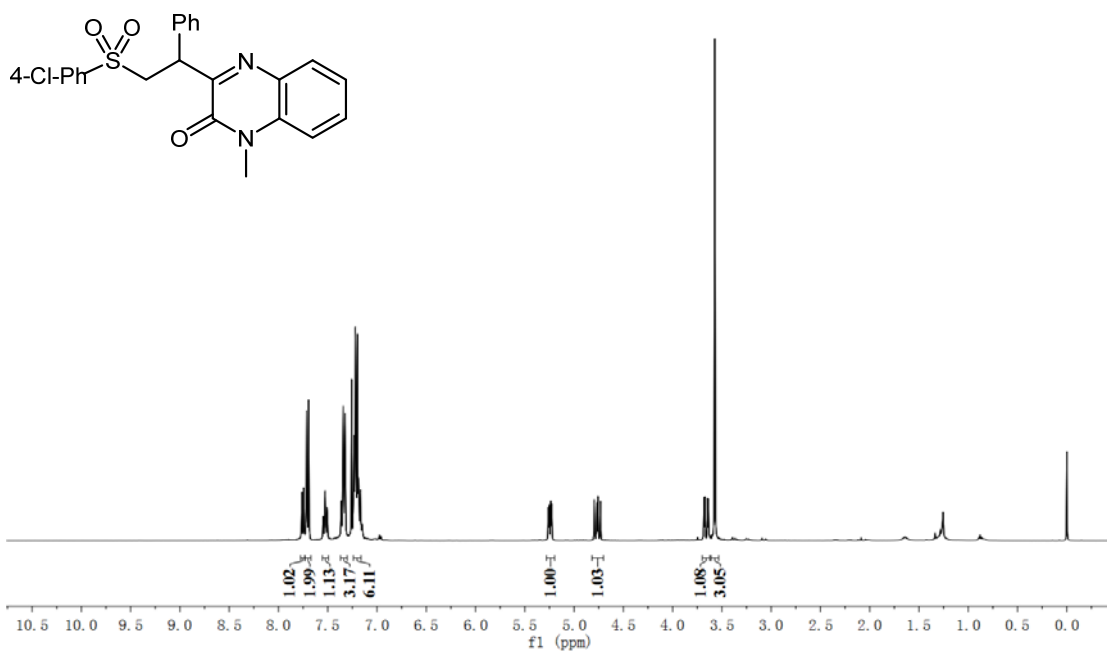

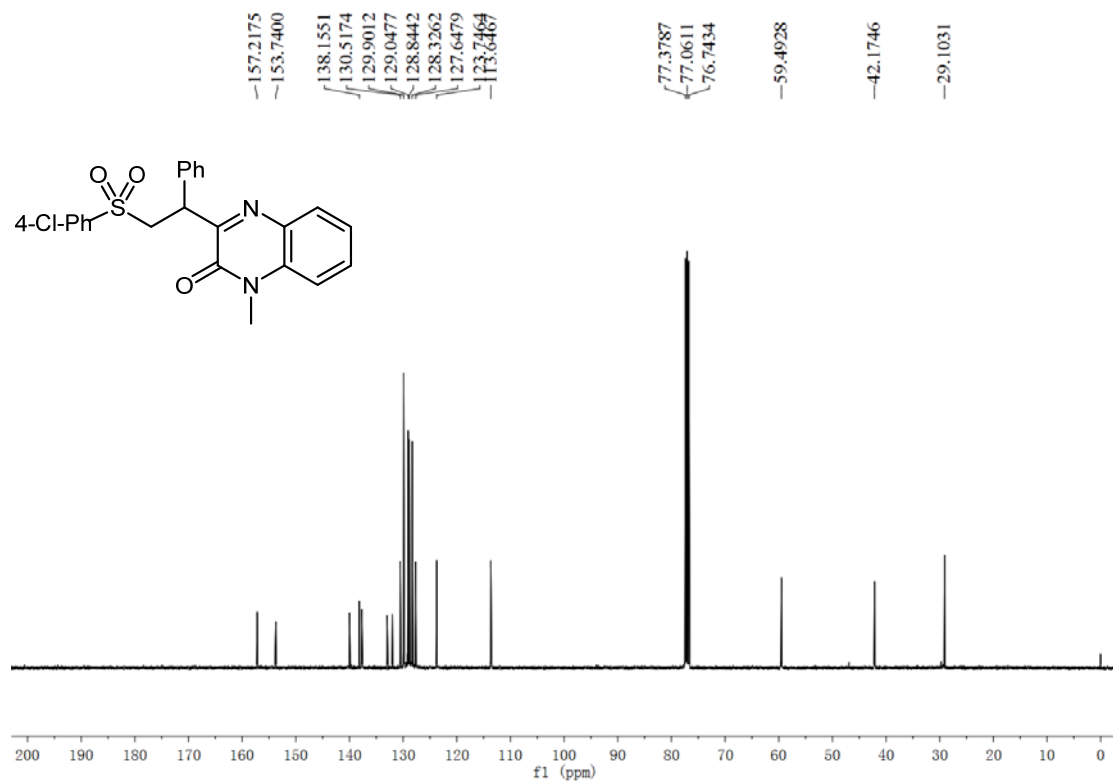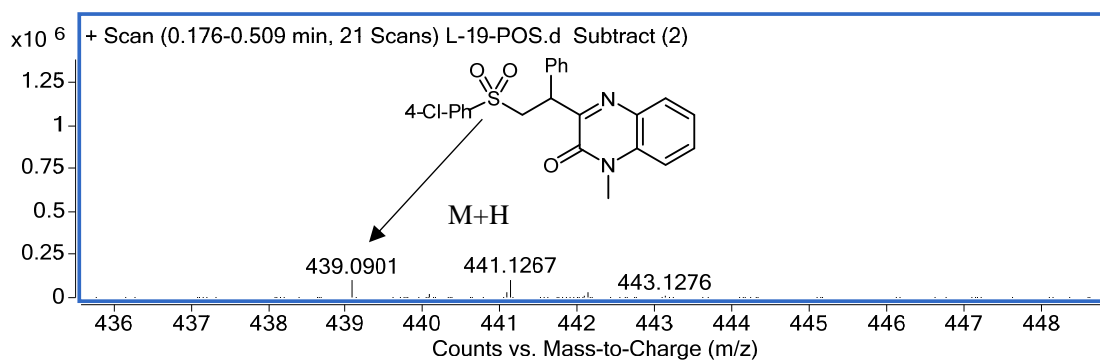

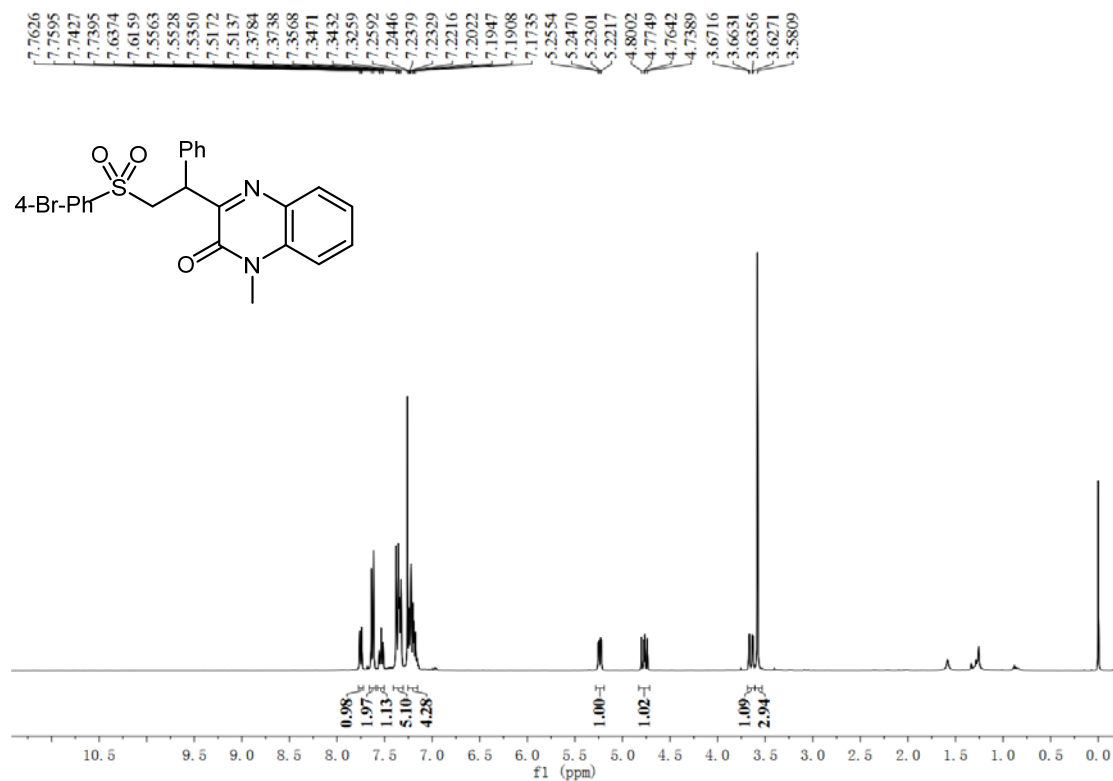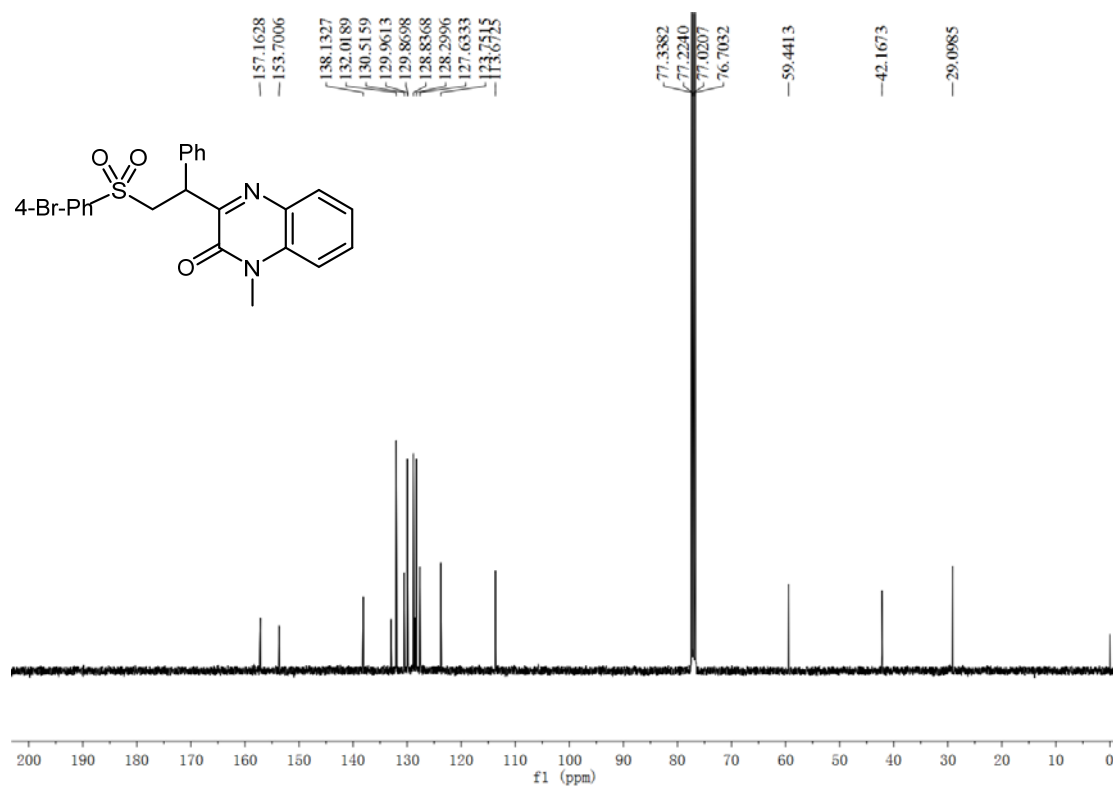

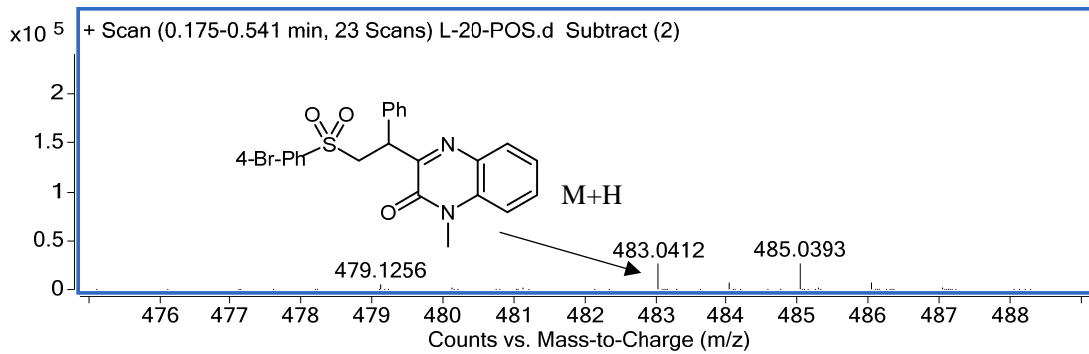

7.9059  
7.8845  
7.8631  
7.8417  
7.7144  
7.7112  
7.6945  
7.6912  
7.4911  
7.4733  
7.4698  
7.3418  
7.3382  
7.3216  
7.3056  
7.2853  
7.2609  
7.2303  
7.2262  
7.2092  
7.1904  
7.1777  
4.1591  
3.3012  
5.2927  
5.2759  
5.2674  
4.7980  
4.7619  
4.7389  
3.8887  
3.6906  
3.6820  
3.6545  
3.6459  
3.5690

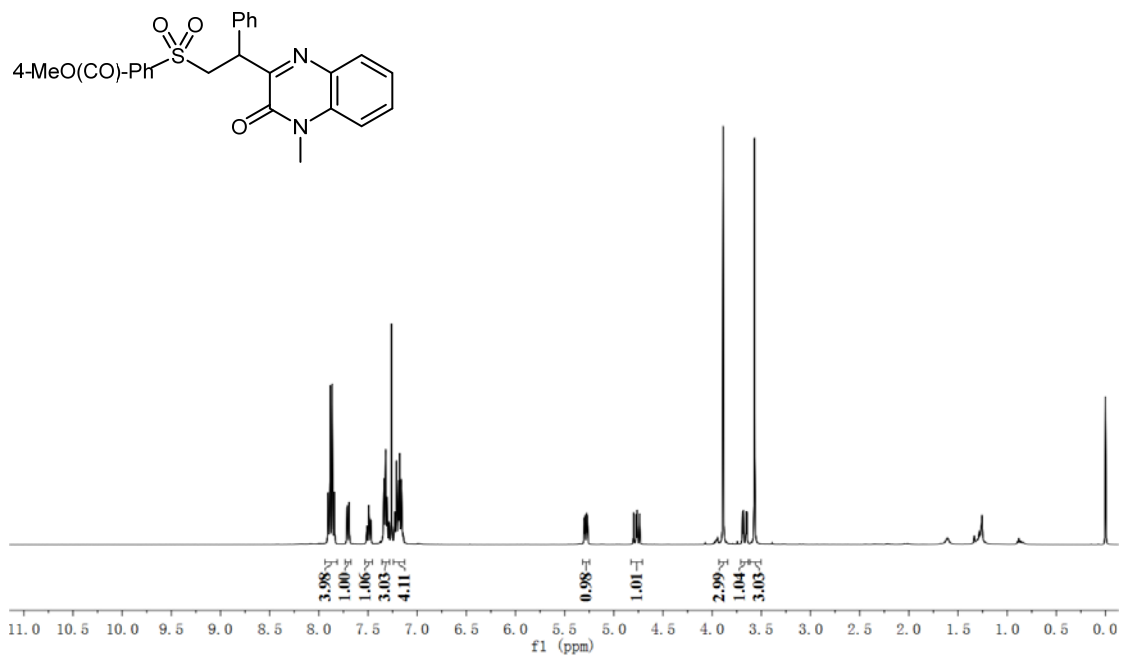

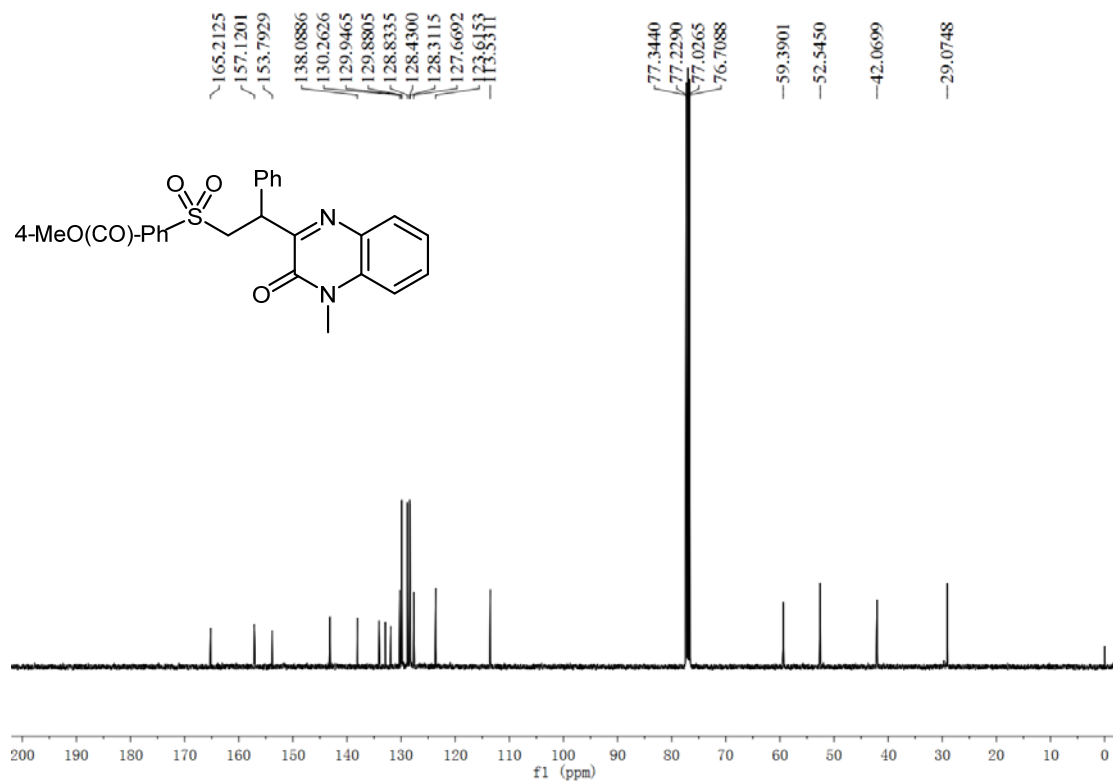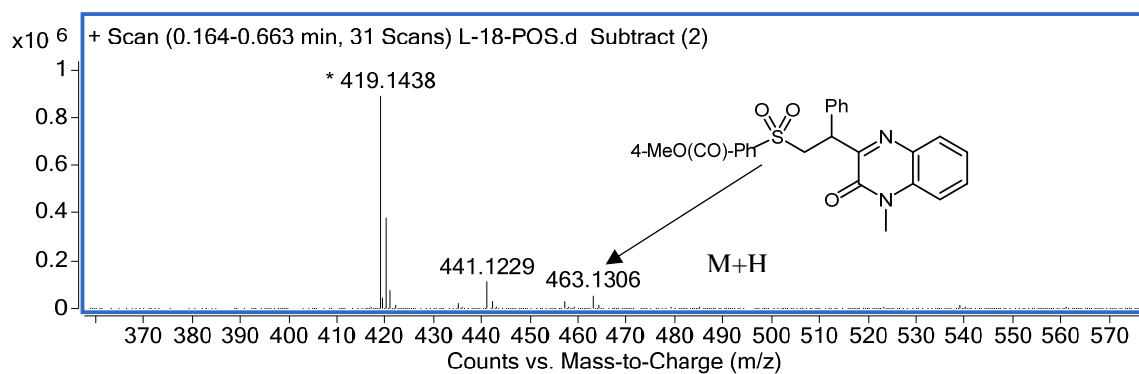

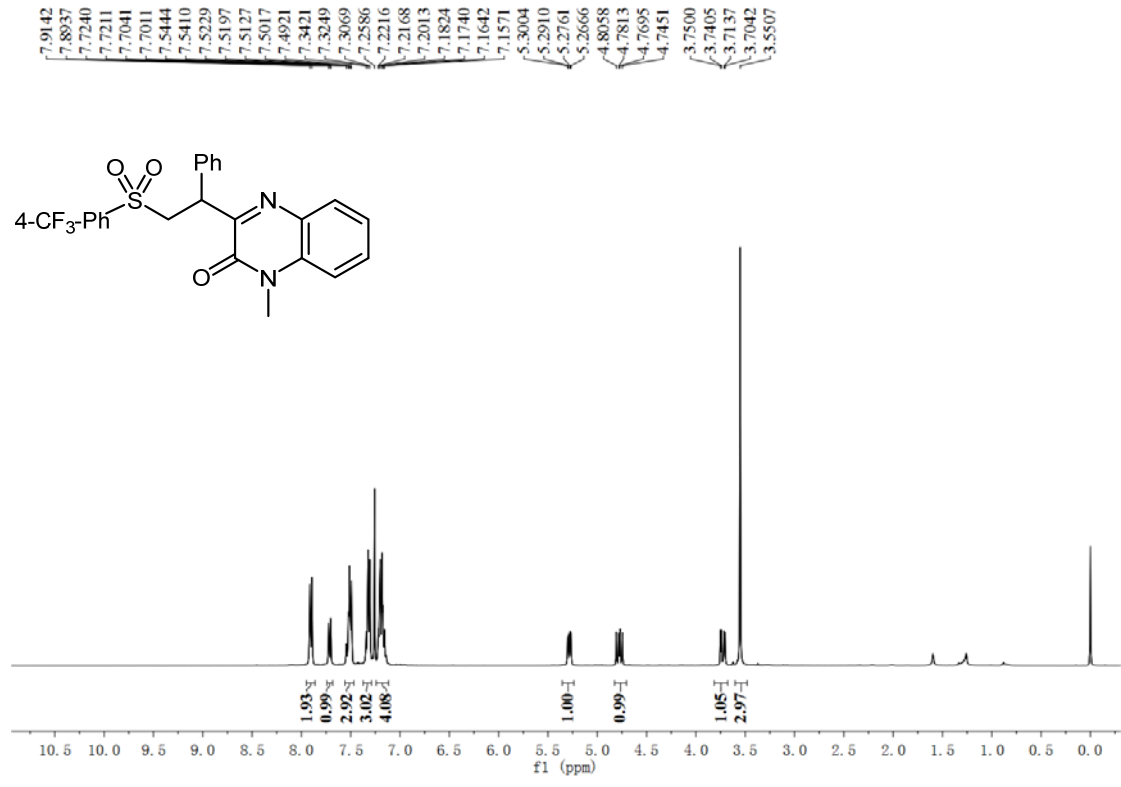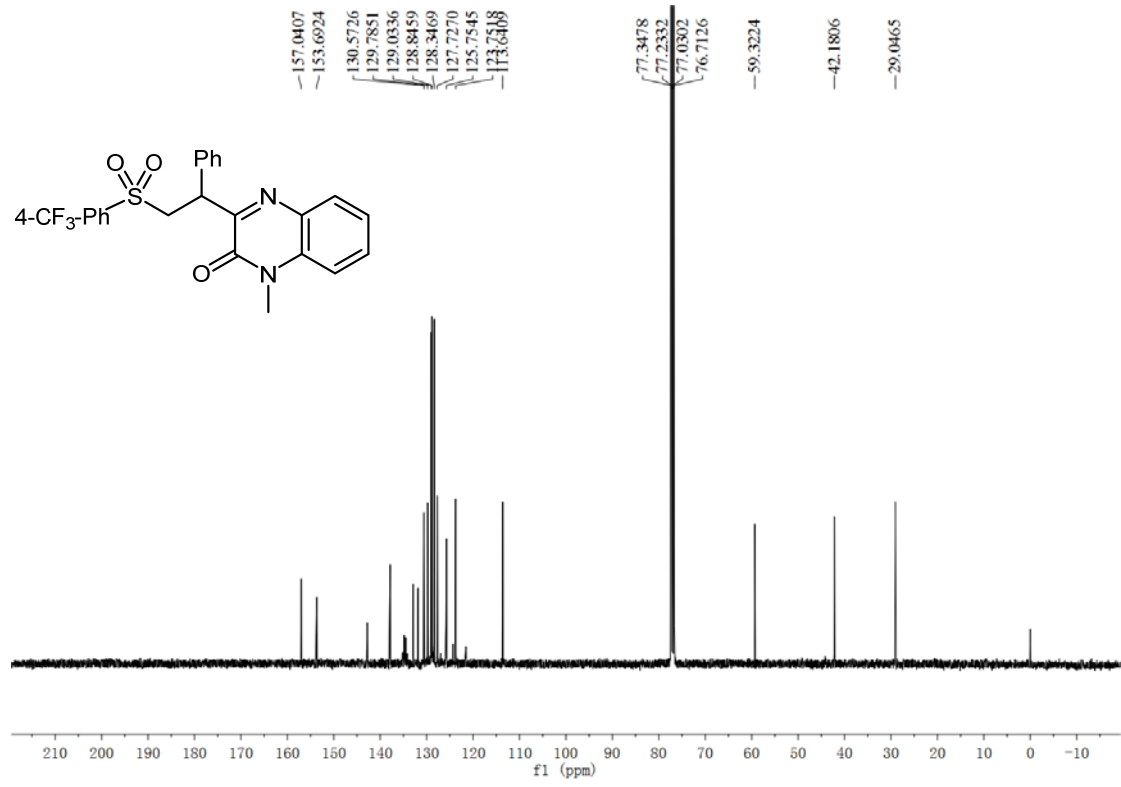

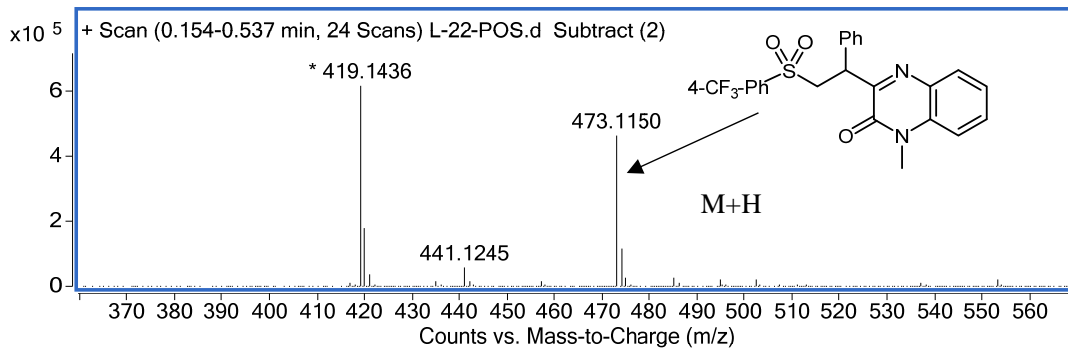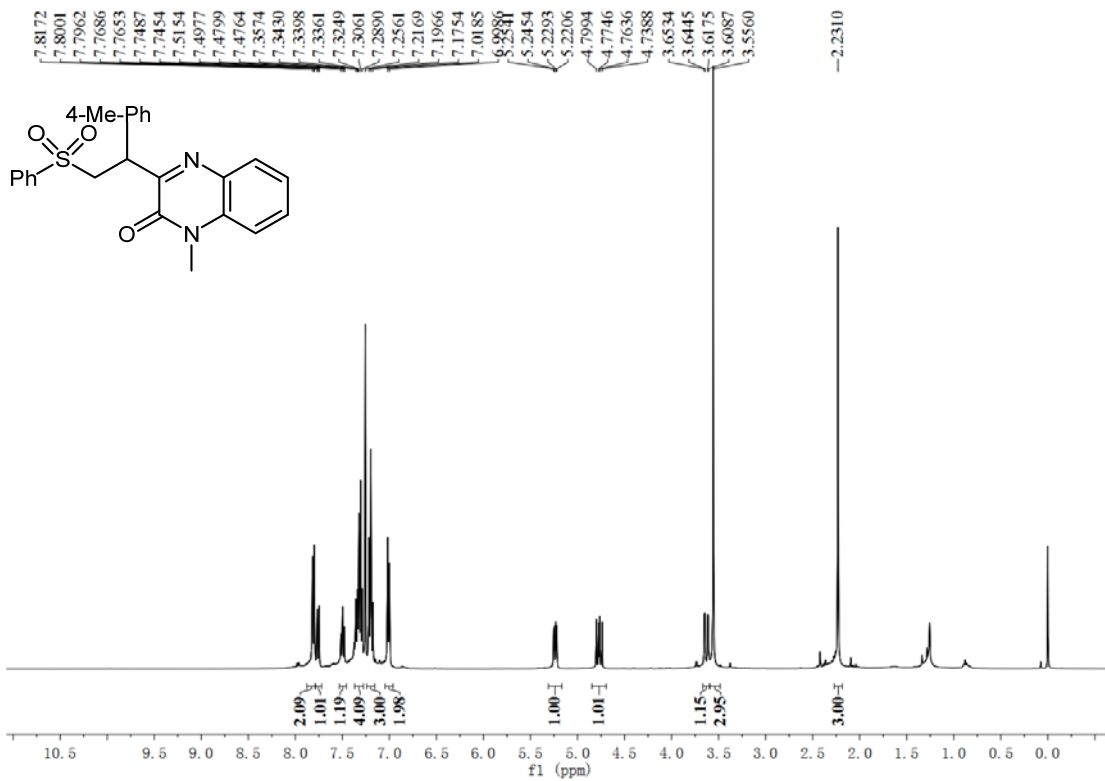

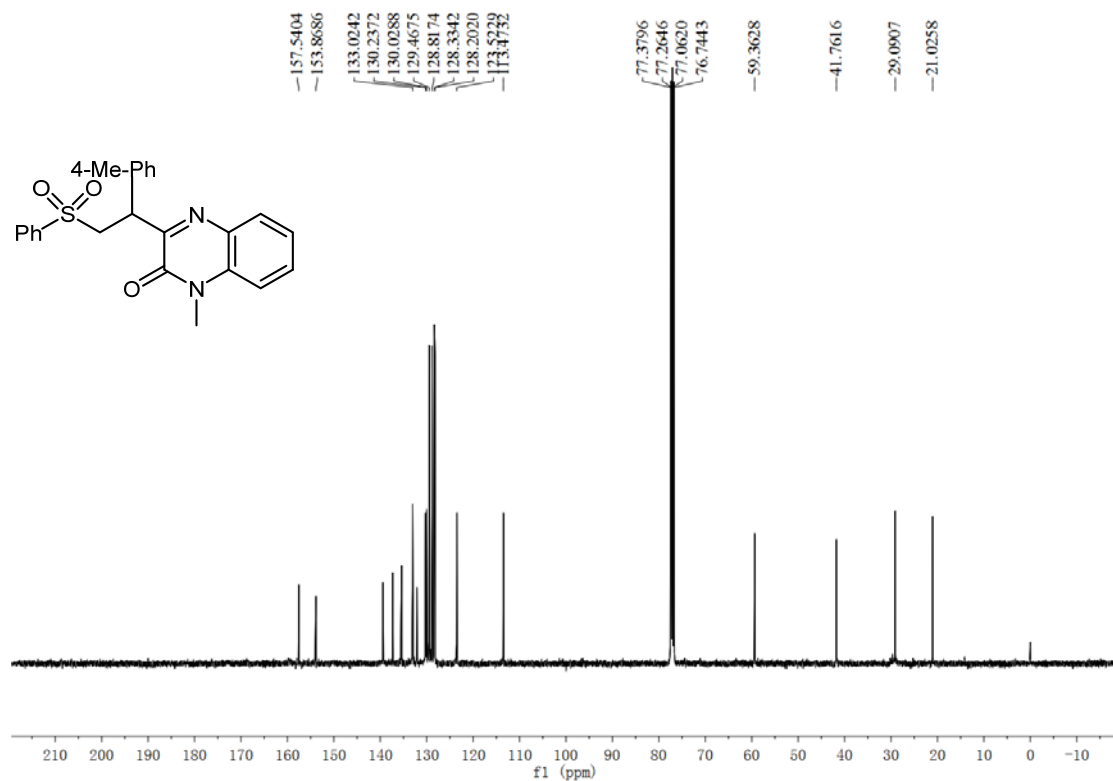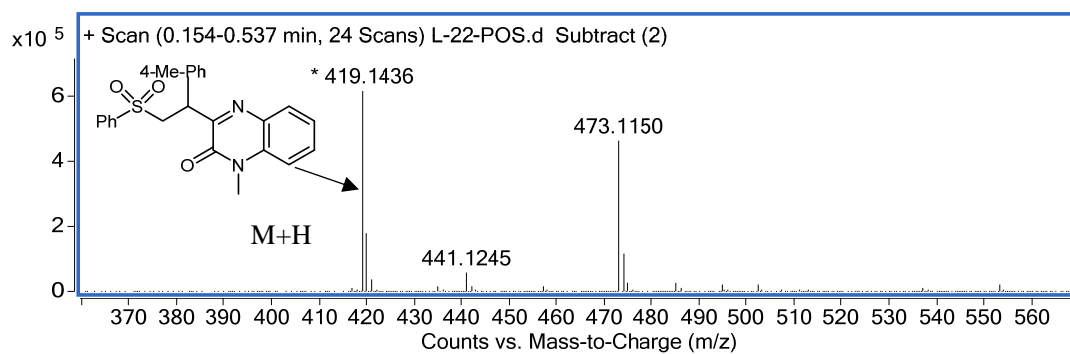



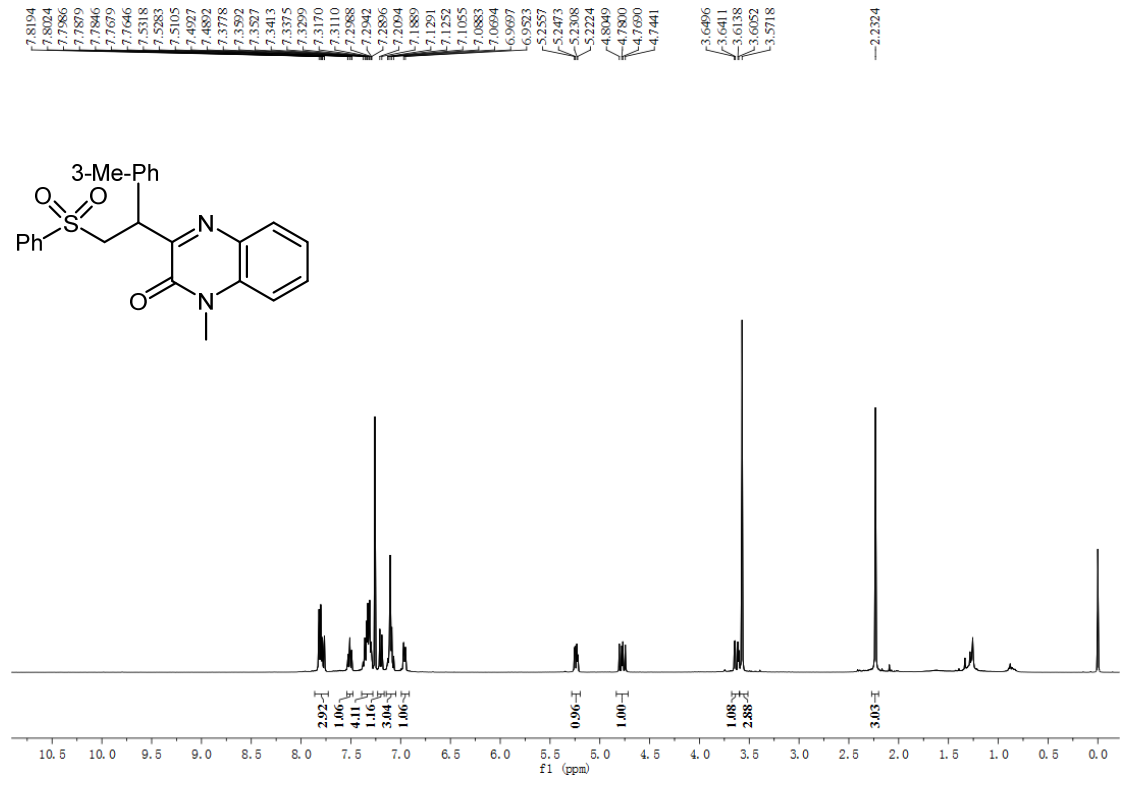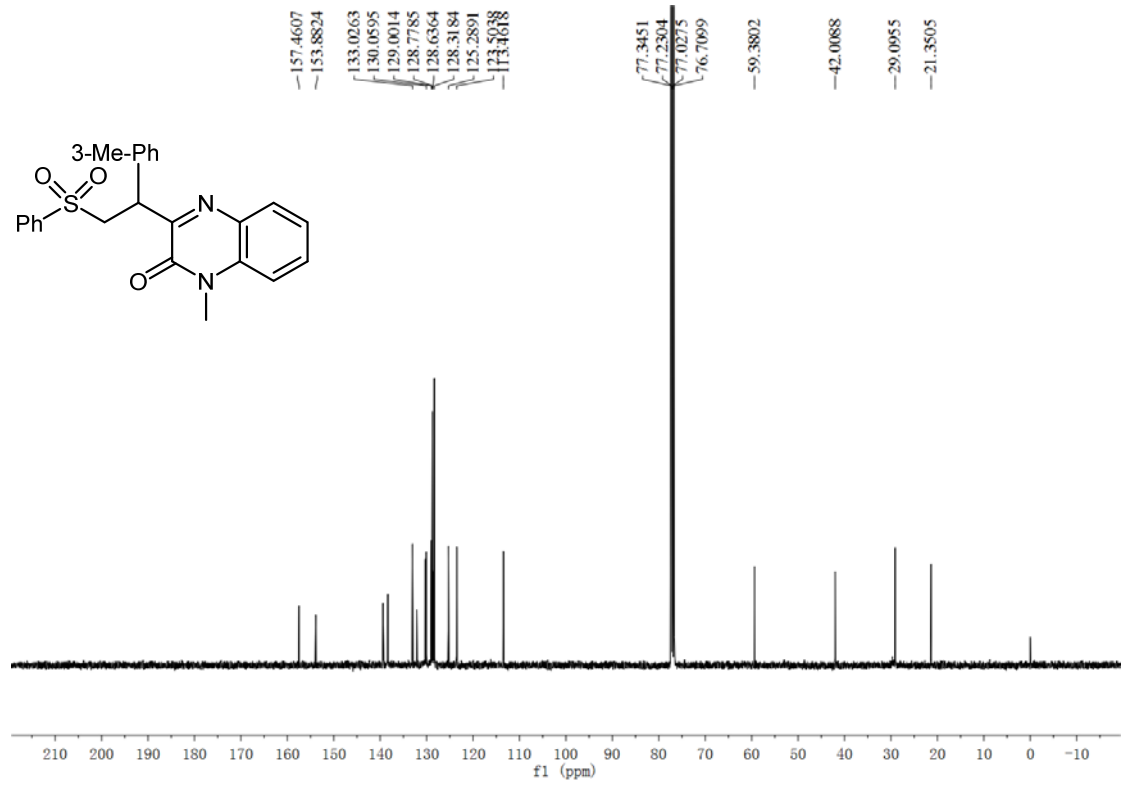

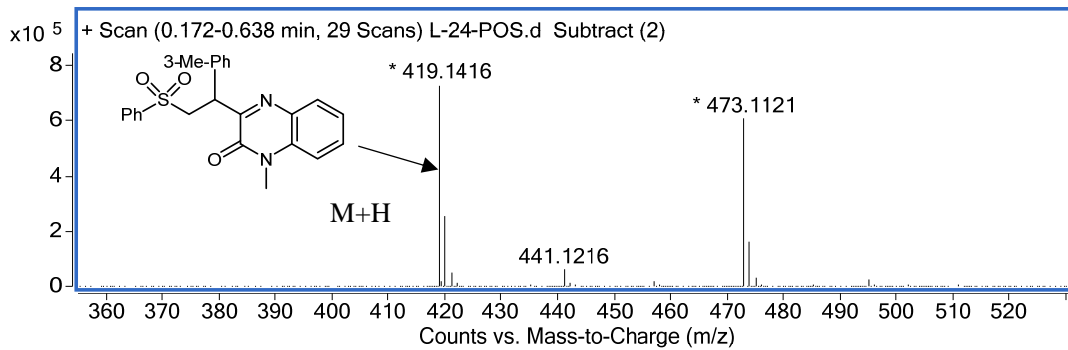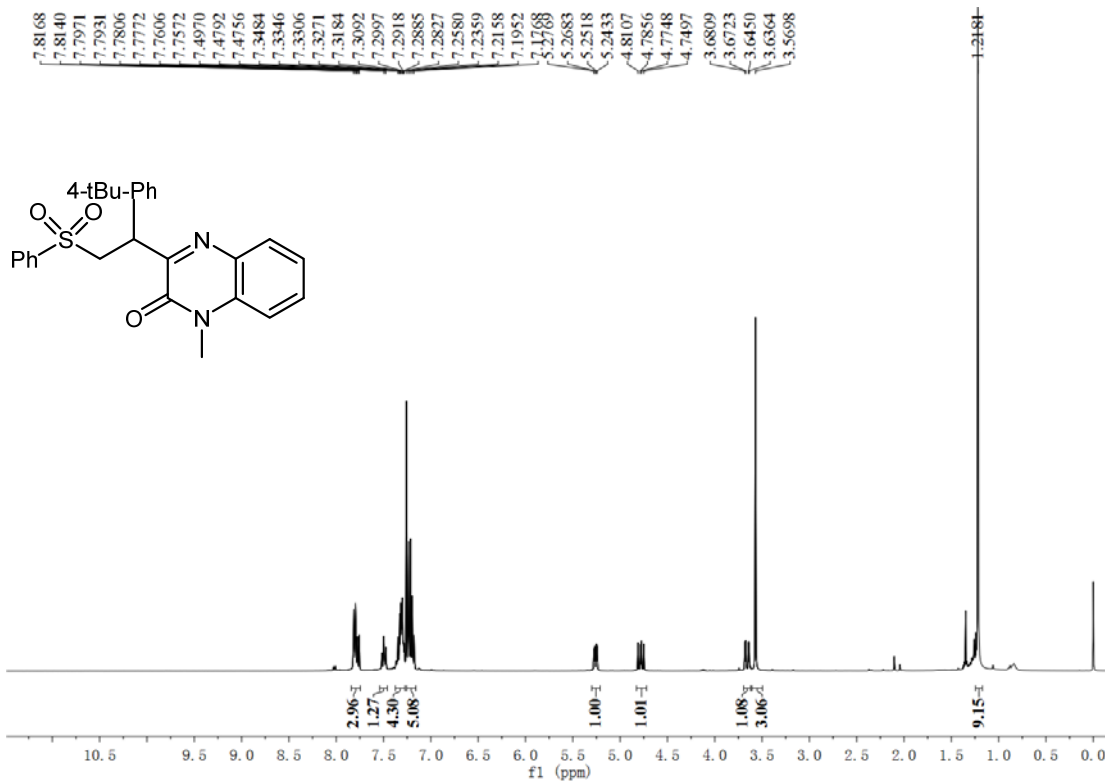

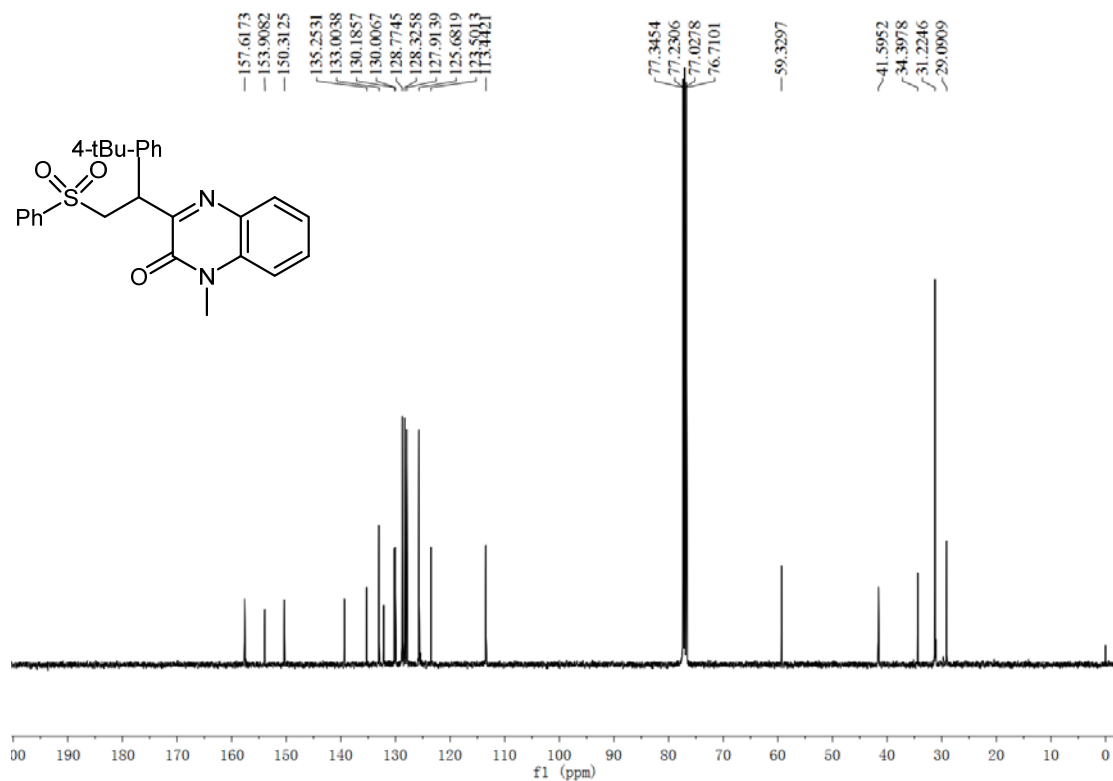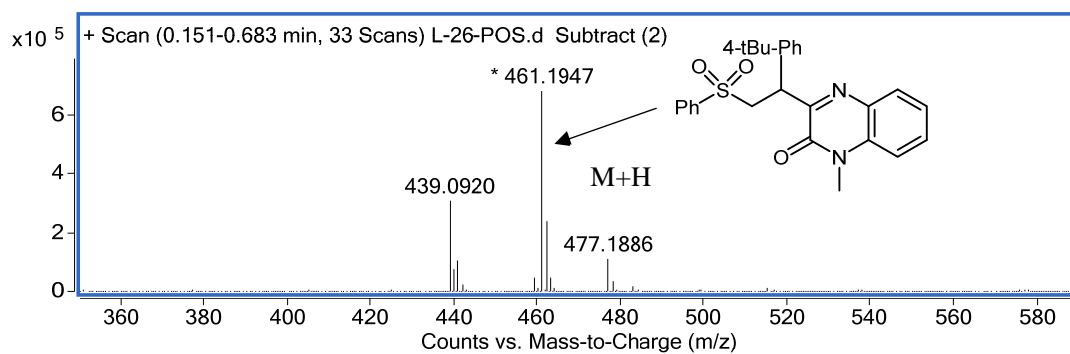

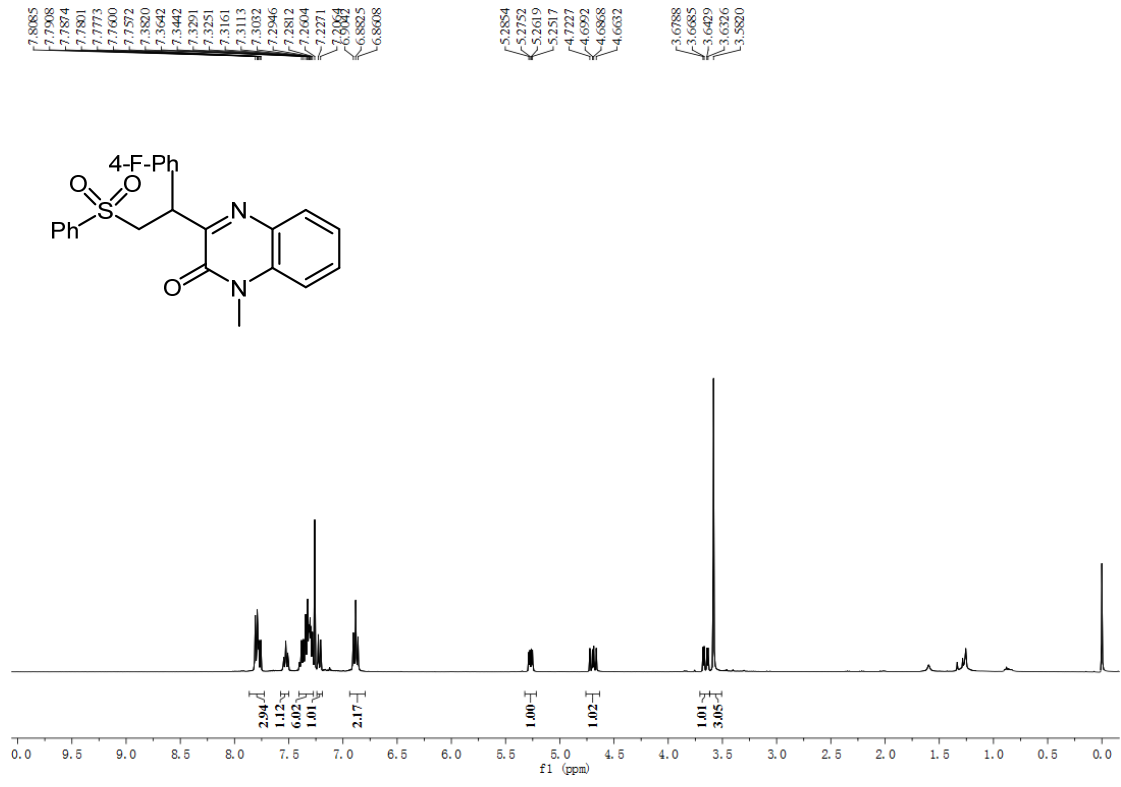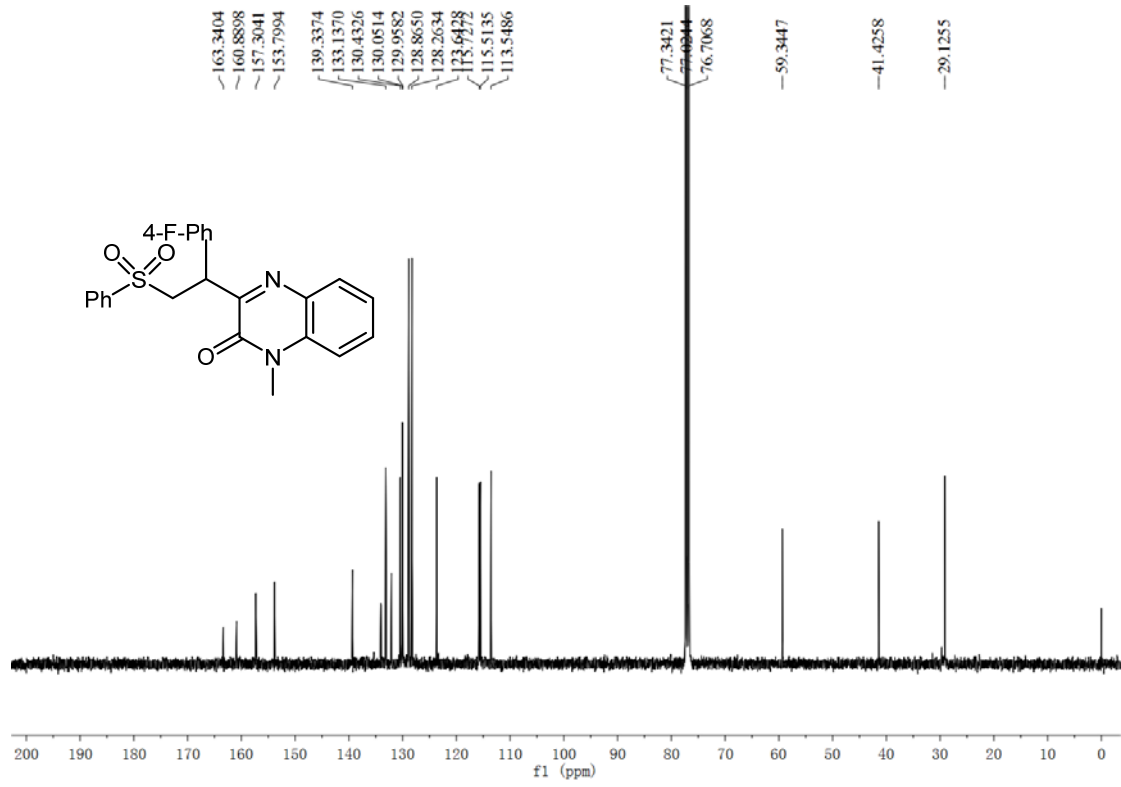

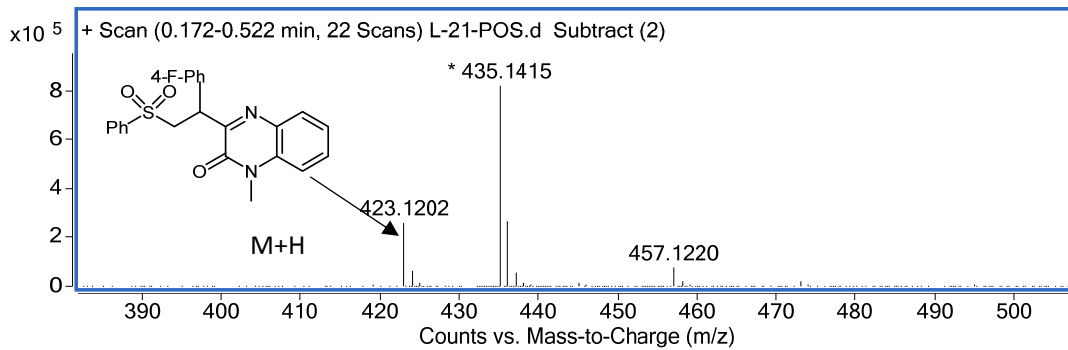

7.1977  
7.1795  
7.1761  
7.1590  
7.1559  
7.524  
7.5490  
7.5311  
7.5133  
7.5098  
7.4118  
7.3997  
7.3933  
7.3879  
7.3752  
7.3471  
7.3276  
7.3231  
7.3139  
7.3100  
7.3063  
7.3017  
7.2606  
7.2294  
7.2100  
7.1890  
5.2557  
5.2450  
5.2327  
5.2220  
4.6974  
4.6743  
4.6614  
4.6383  
3.6884  
3.6776  
3.6524  
3.6417  
3.5788

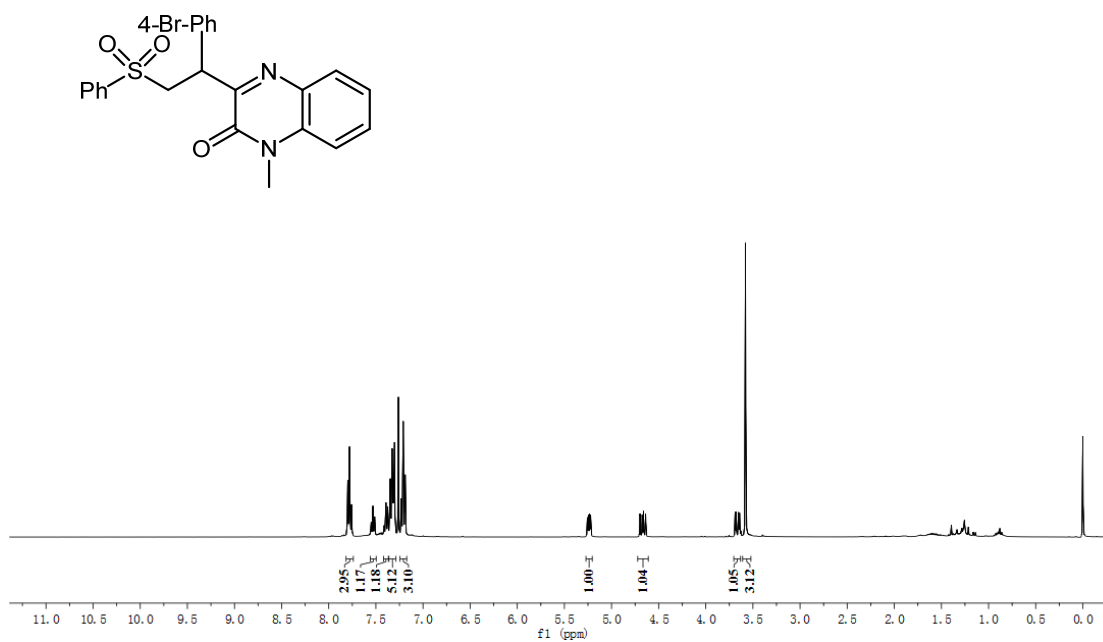

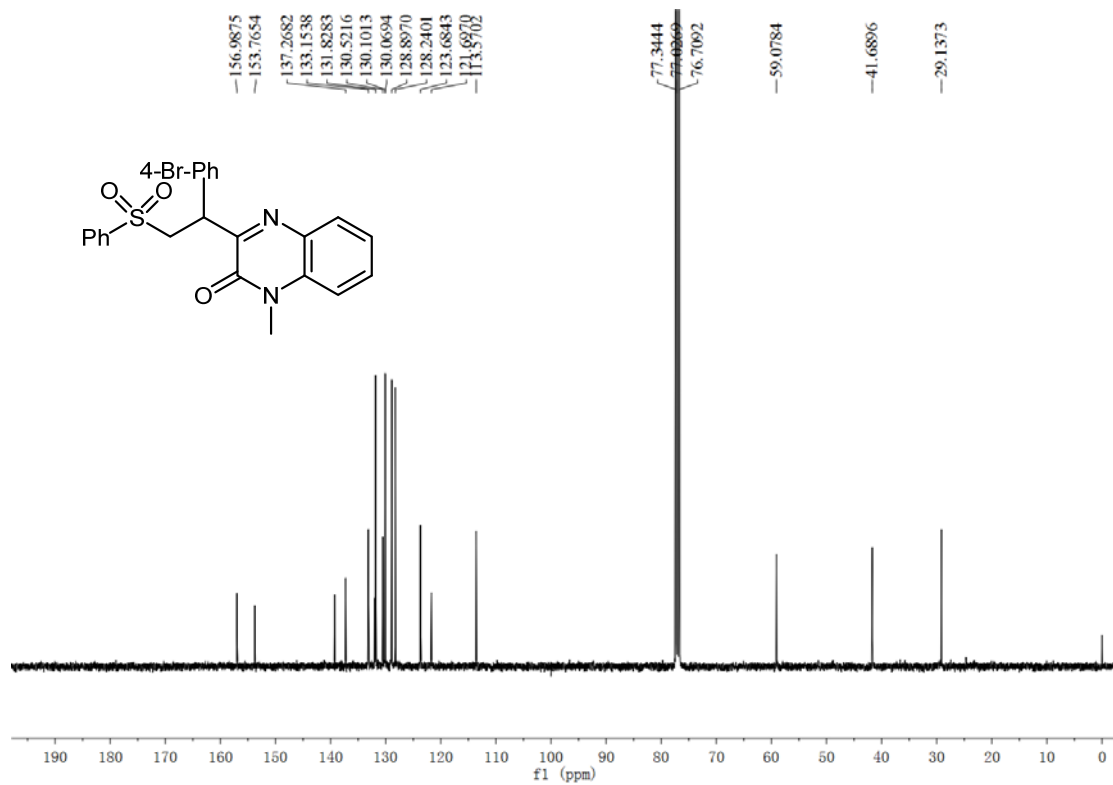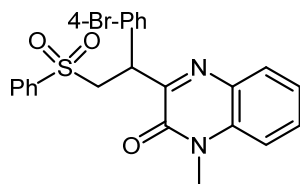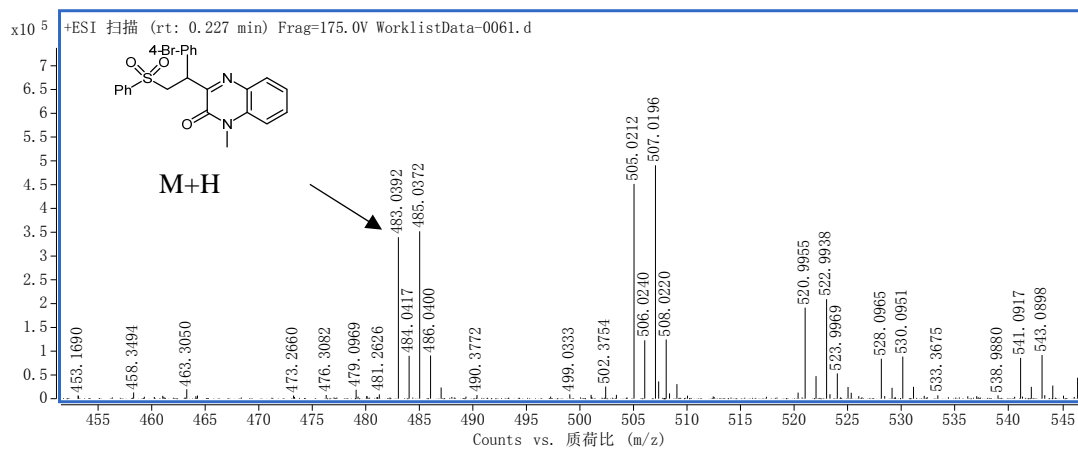

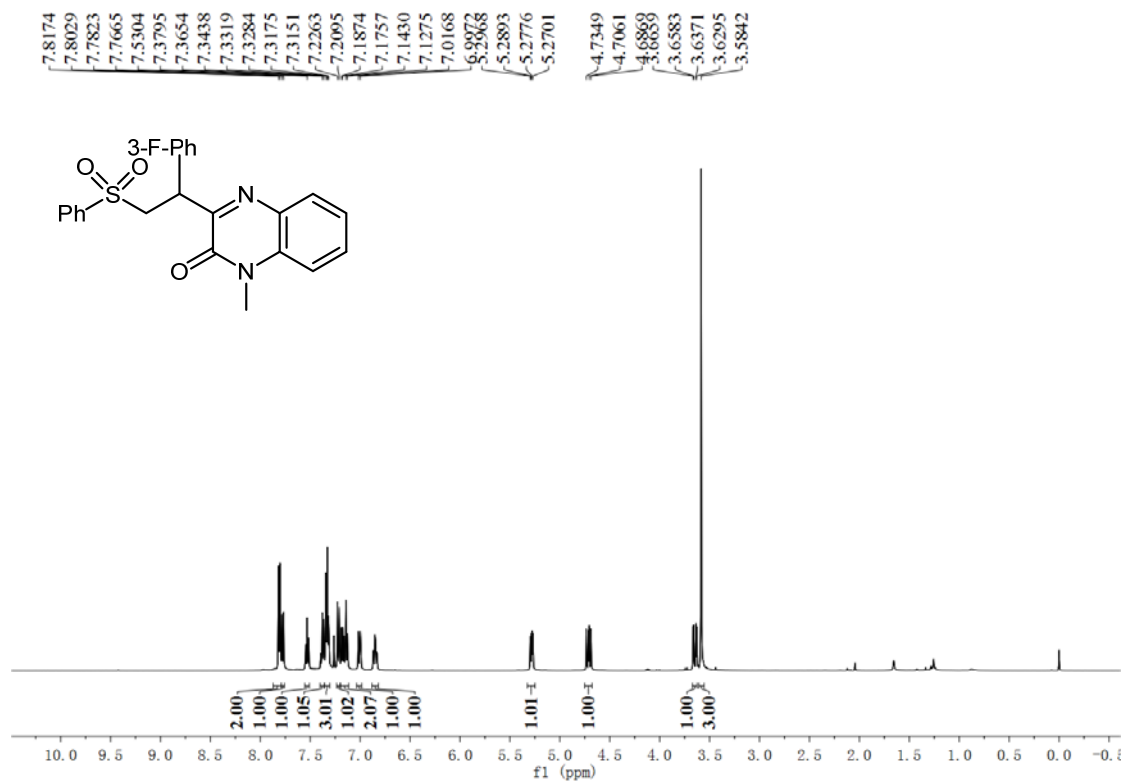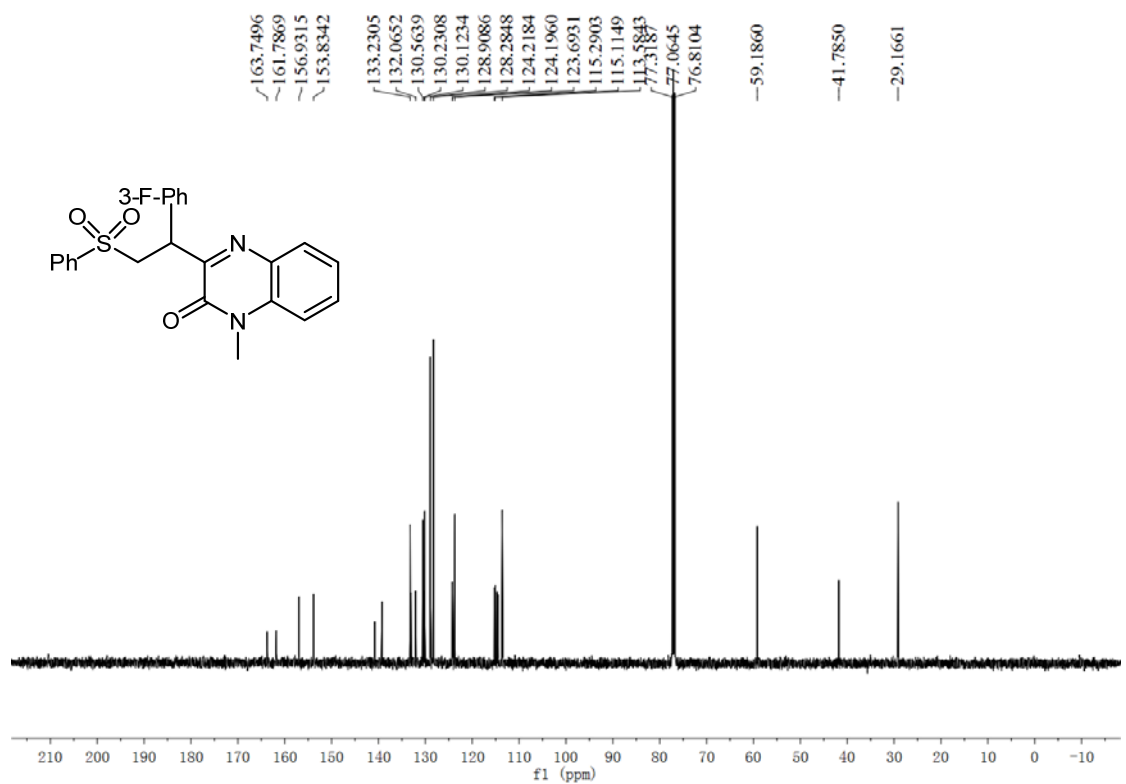

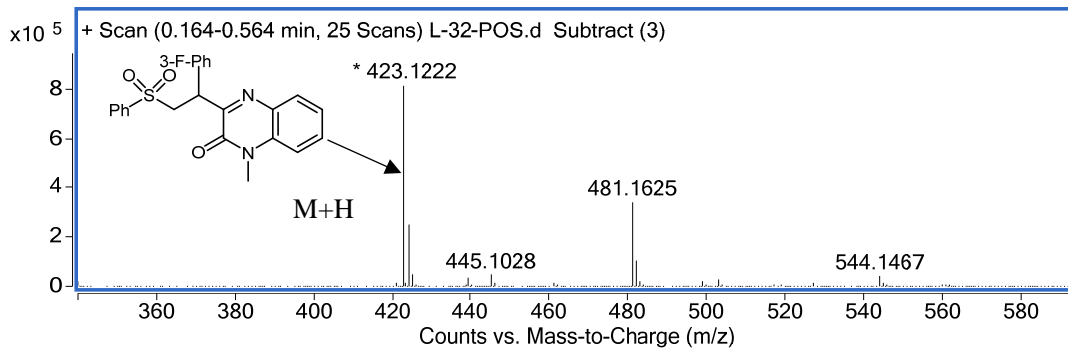

7.8094  
7.7922  
7.7768  
7.5536  
7.5553  
7.5170  
7.3876  
7.3699  
7.3508  
7.3357  
7.3319  
7.3160  
7.2604  
7.2336  
7.2126  
7.1673  
7.1473  
7.1359  
7.1300  
7.1168  
7.1119  
5.2722  
5.2622  
5.2488  
5.2388  
4.7163  
4.6927  
4.6803  
4.6568  
3.6772  
3.6671  
3.6412  
3.6311  
3.5876

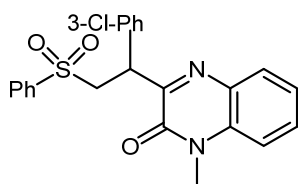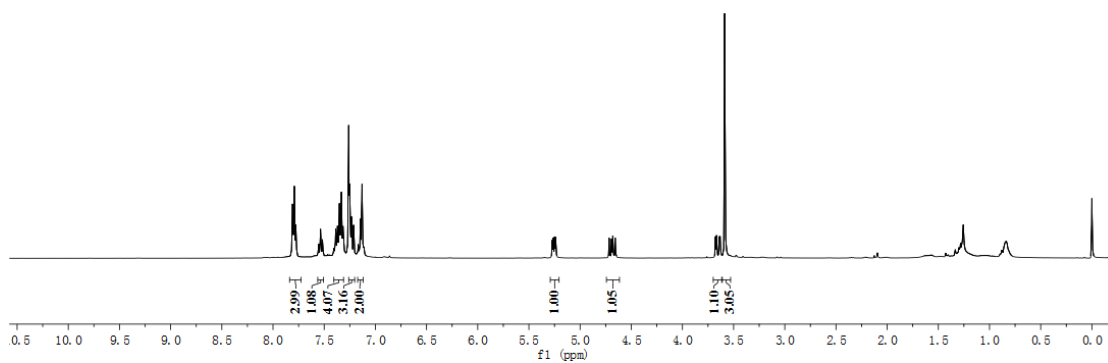



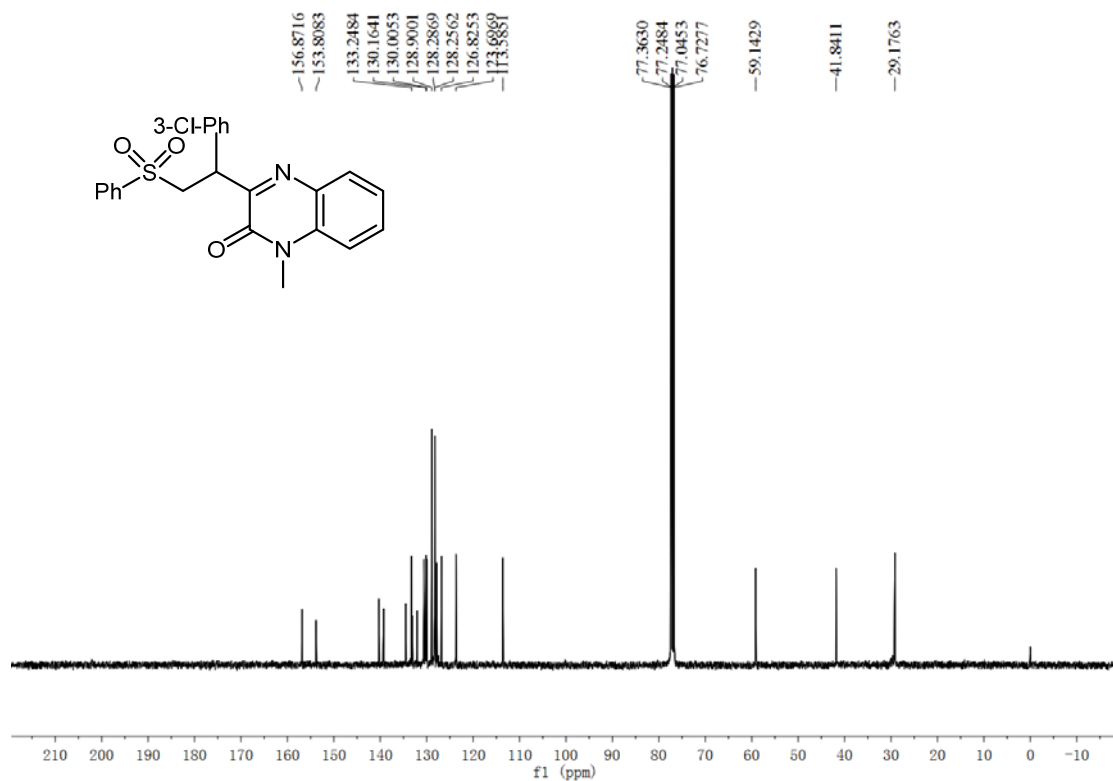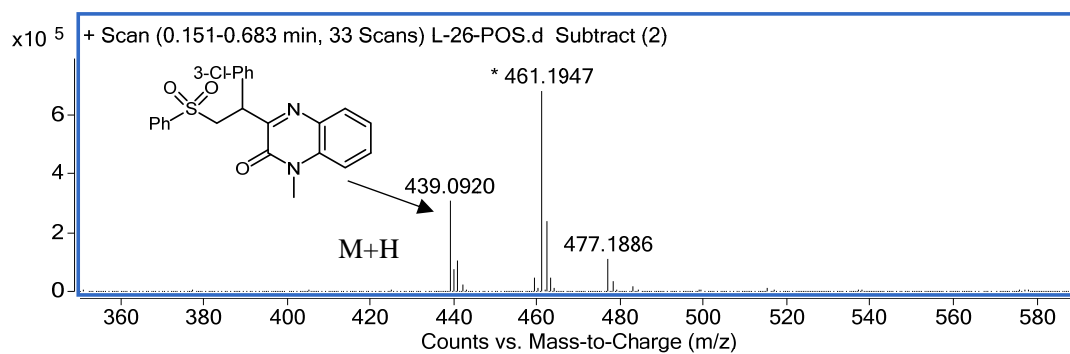

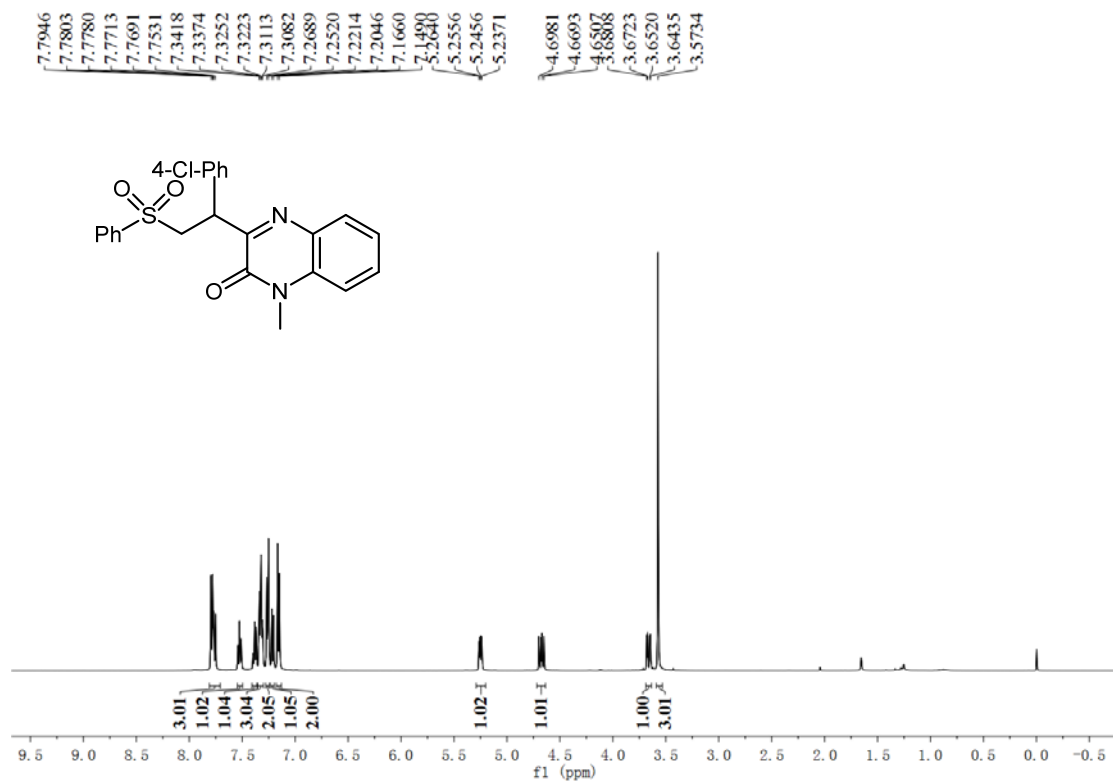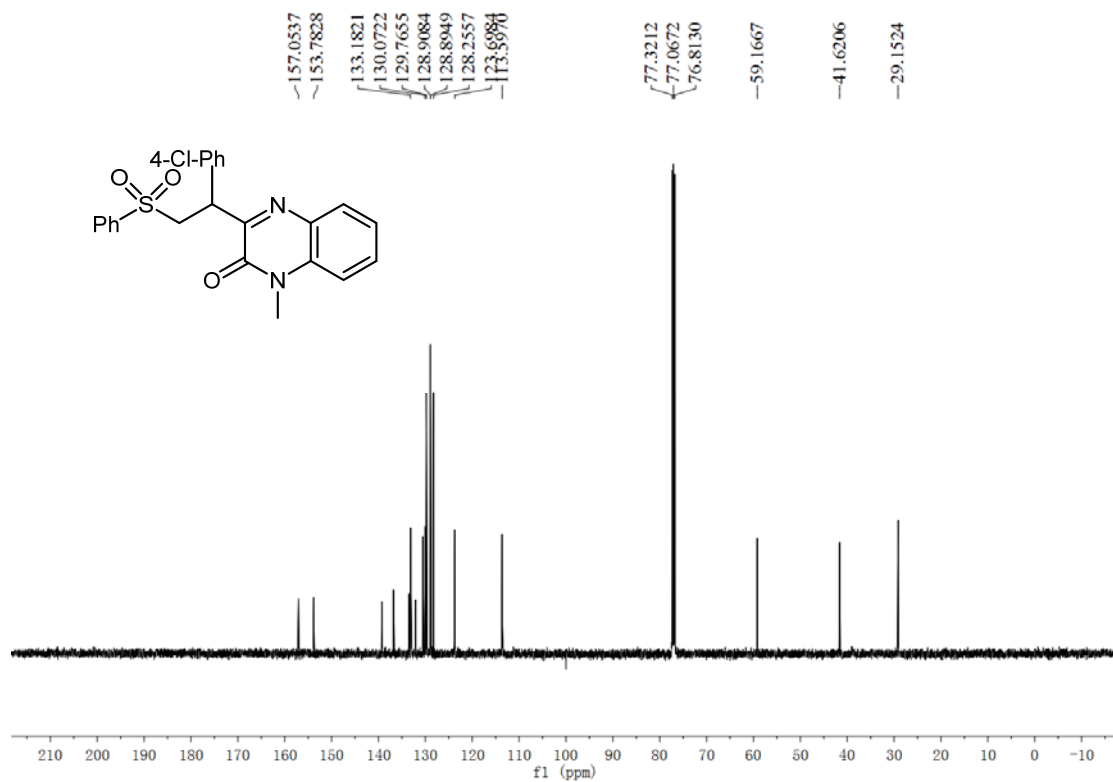

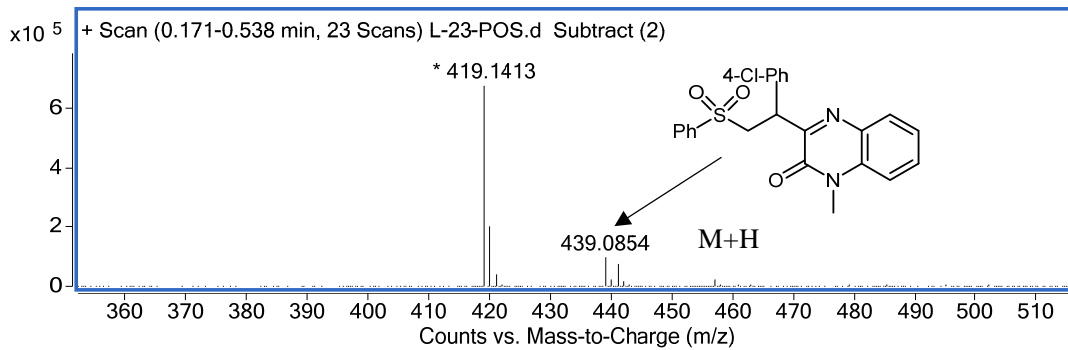

7.8066  
7.7925  
7.7886  
7.7880  
7.7761  
7.7730  
7.5793  
7.5763  
7.5583  
7.5404  
7.5370  
7.5117  
7.4906  
7.4749  
7.4536  
7.4379  
7.4193  
7.4011  
7.3695  
7.3528  
7.3498  
7.3355  
7.3323  
7.3031  
7.2821  
5.3294  
5.3287  
5.3284  
5.3167  
4.6744  
4.6523  
4.6384  
4.6164  
3.7179  
3.7002  
3.6820  
3.6702  
3.5897

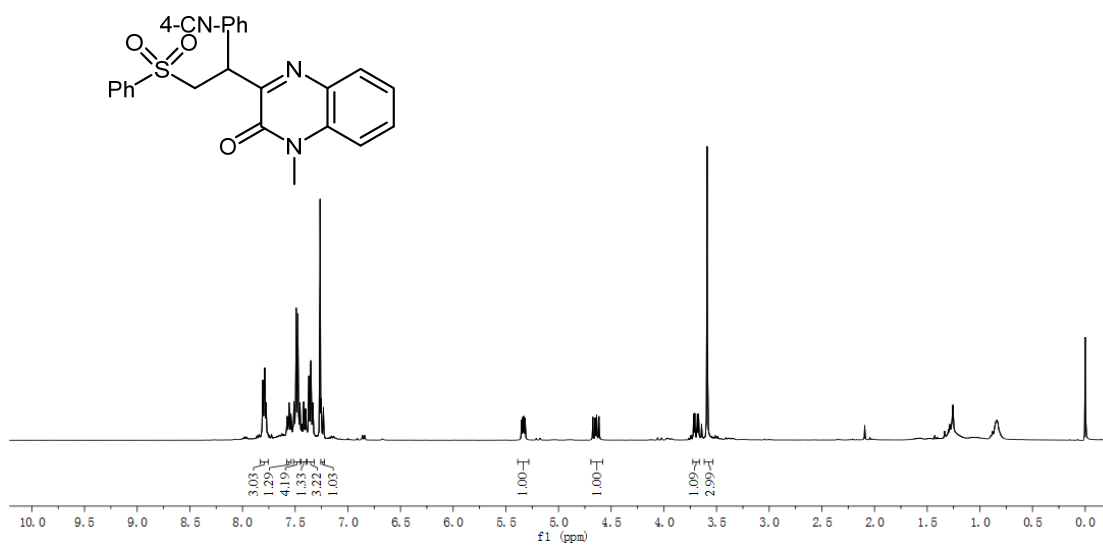

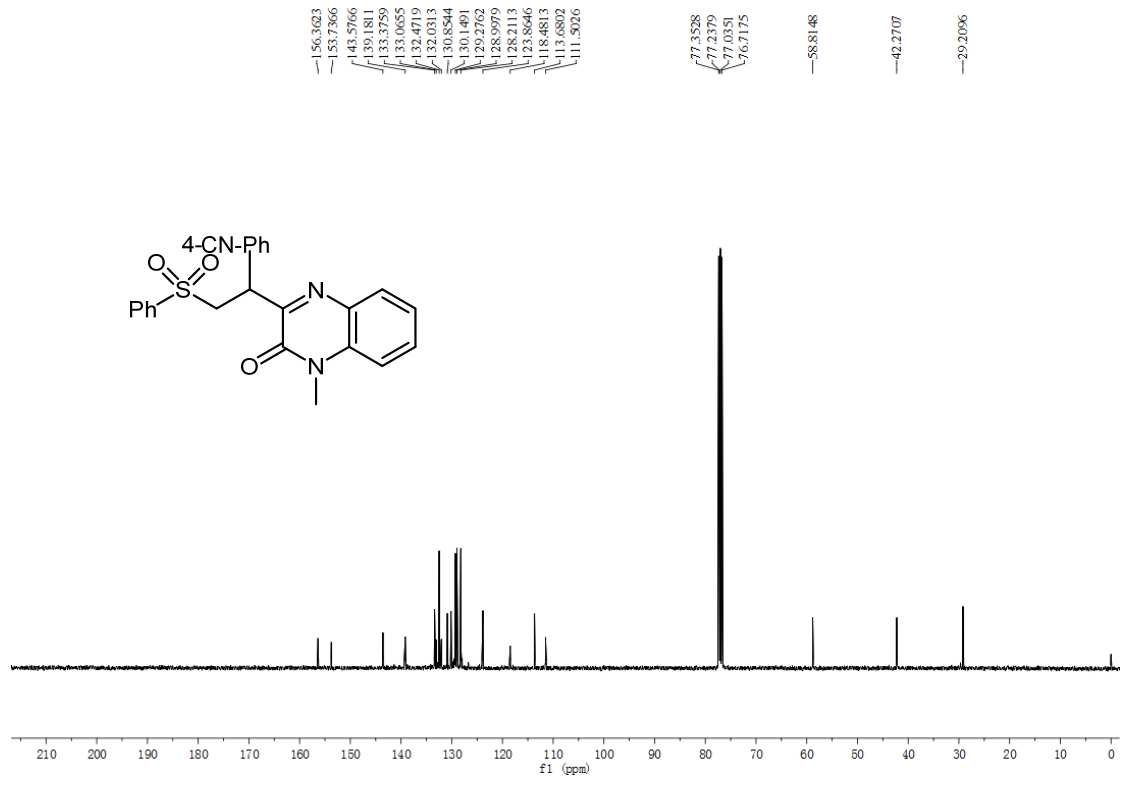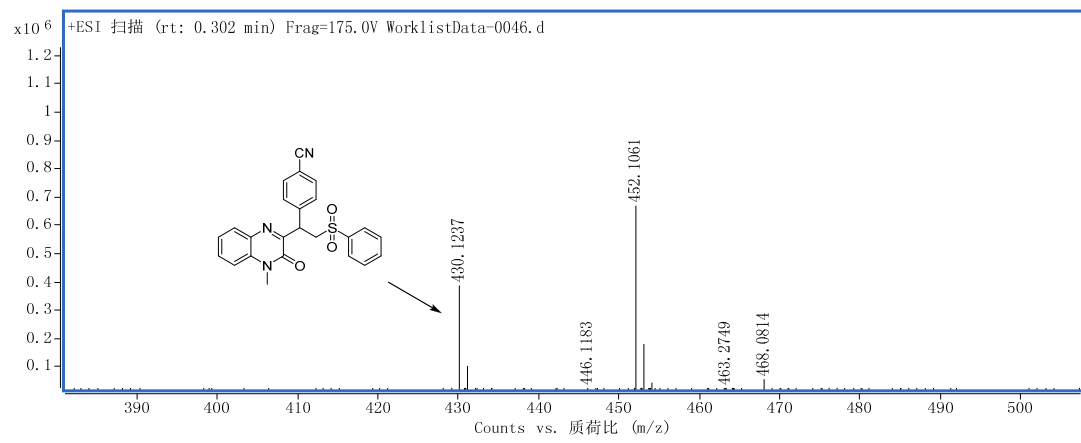

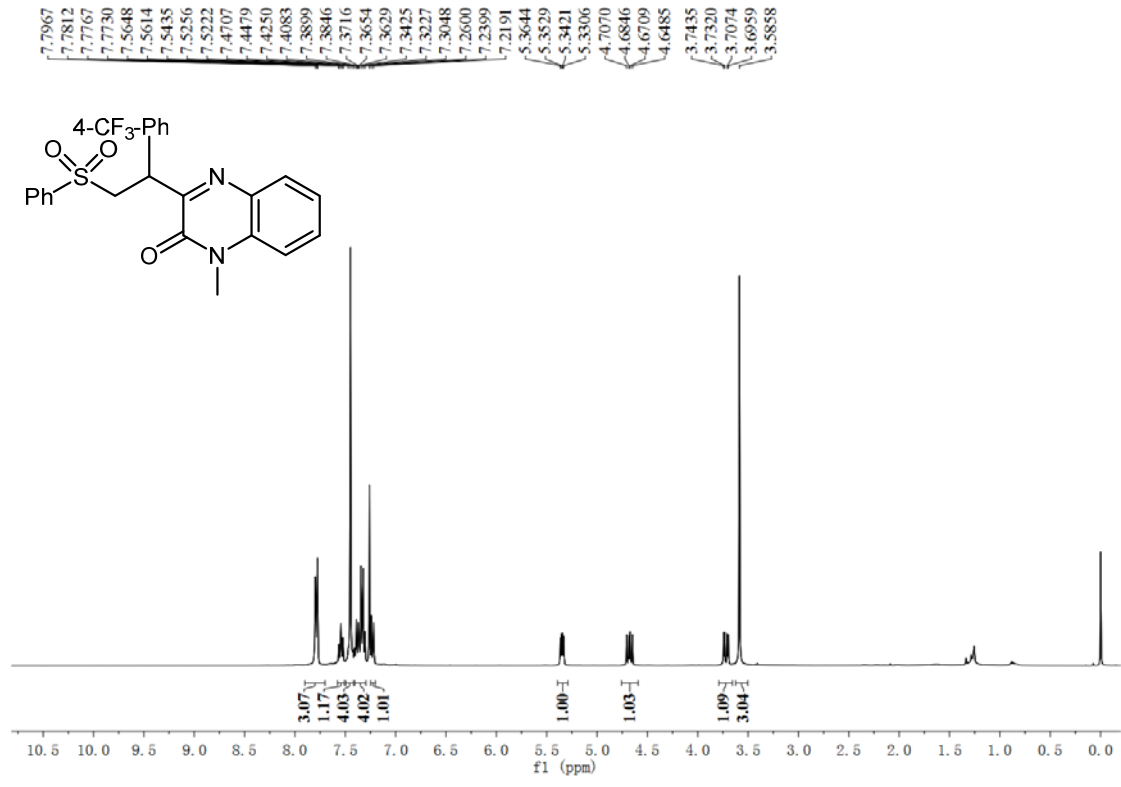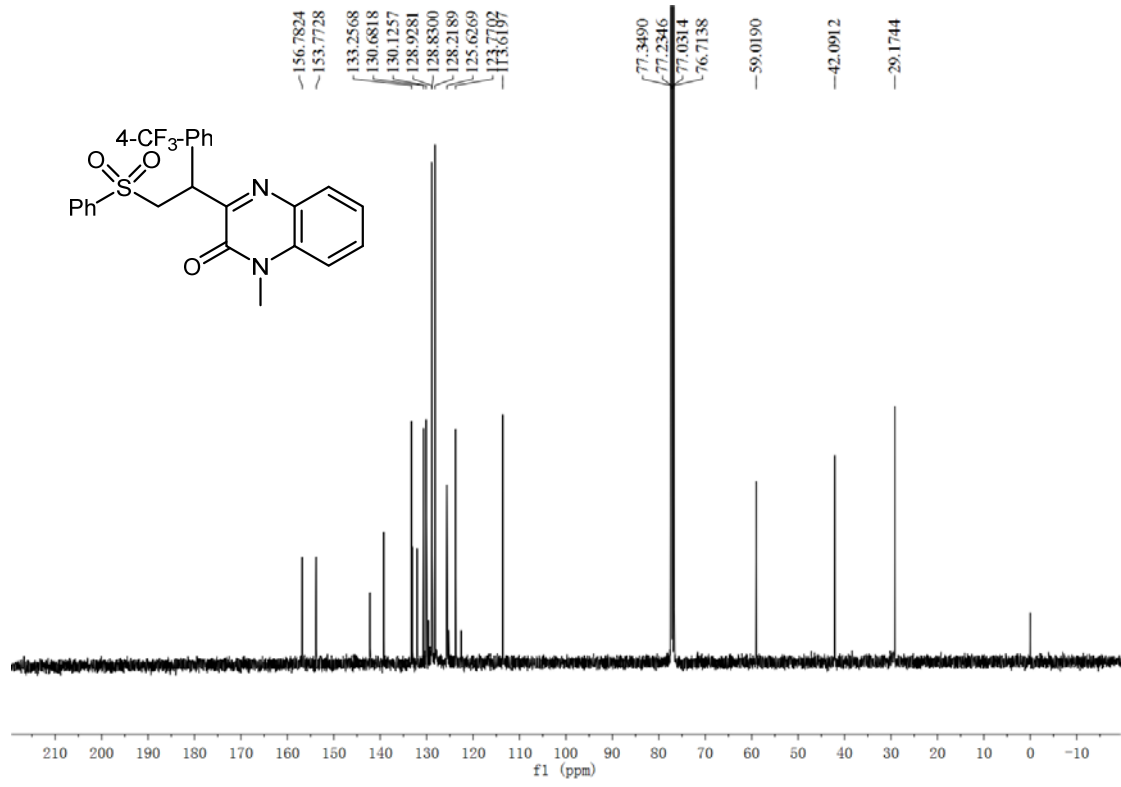

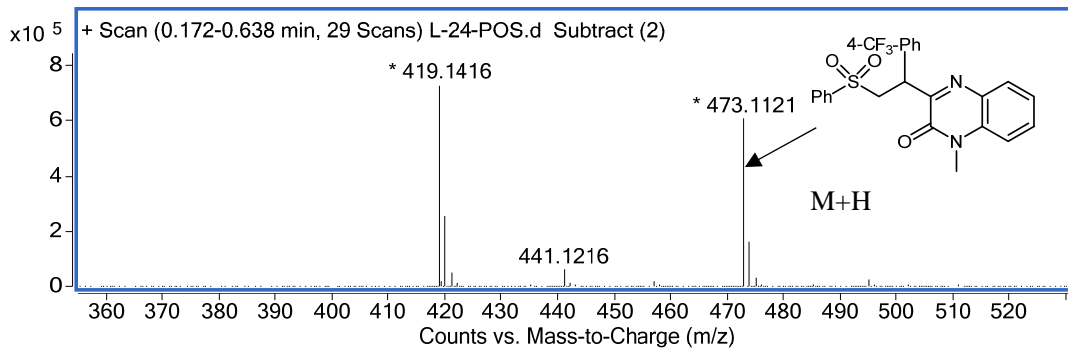

7.8716  
7.8684  
7.8525  
7.8481  
7.8290  
7.8091  
7.8059  
7.5267  
7.5088  
7.5053  
7.3885  
7.3813  
7.3722  
7.3684  
7.3590  
7.3500  
7.3421  
7.3346  
7.3327  
7.3214  
7.2563  
7.2327  
7.2119  
7.1364  
7.1181  
7.0799  
7.0610  
7.0508  
7.0322  
6.9796  
5.9813  
5.9088  
5.4945  
5.4752  
5.4689  
4.8184  
4.7927  
4.7823  
4.7566  
3.5755  
3.4322  
3.4258  
3.3902  
3.3897  
-2.4758  
-0.0000

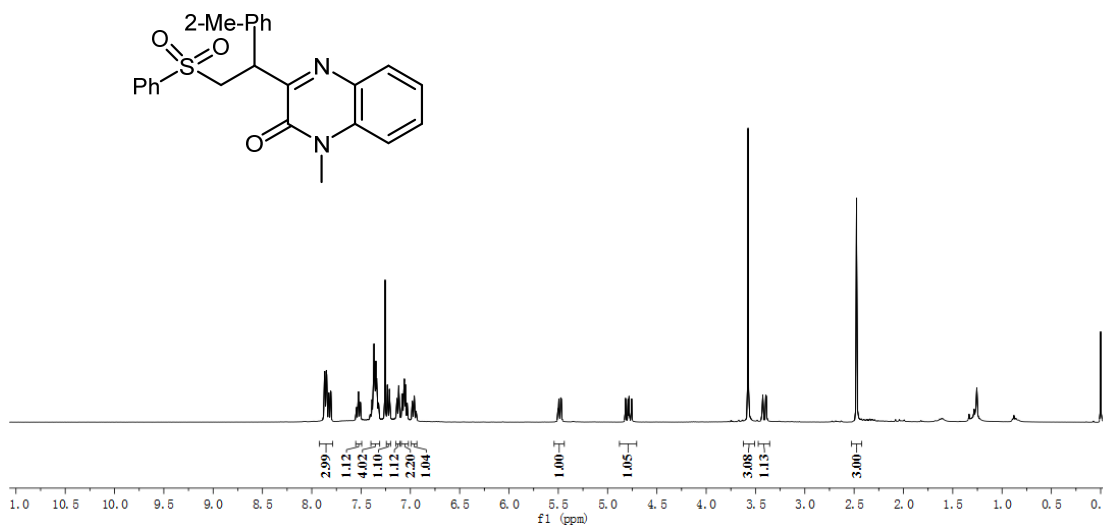

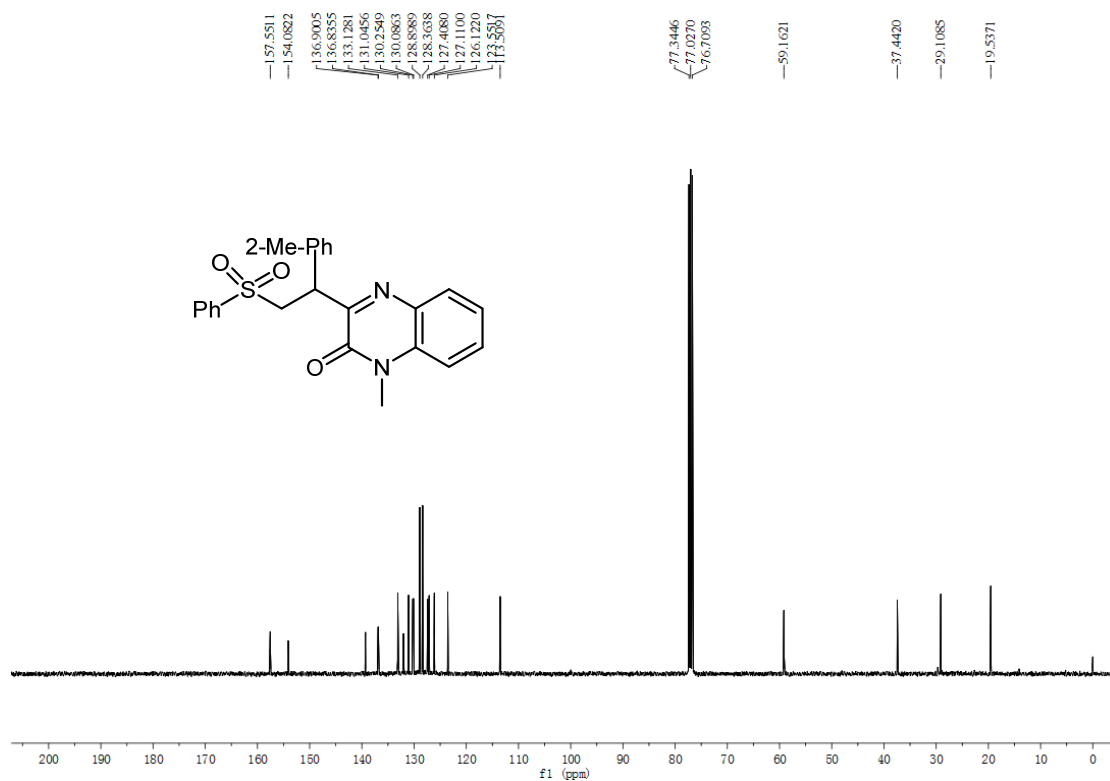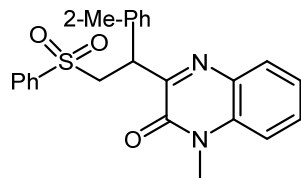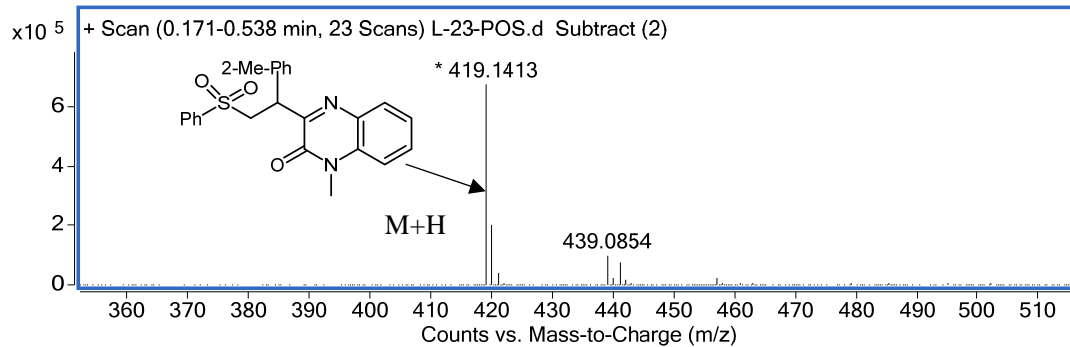

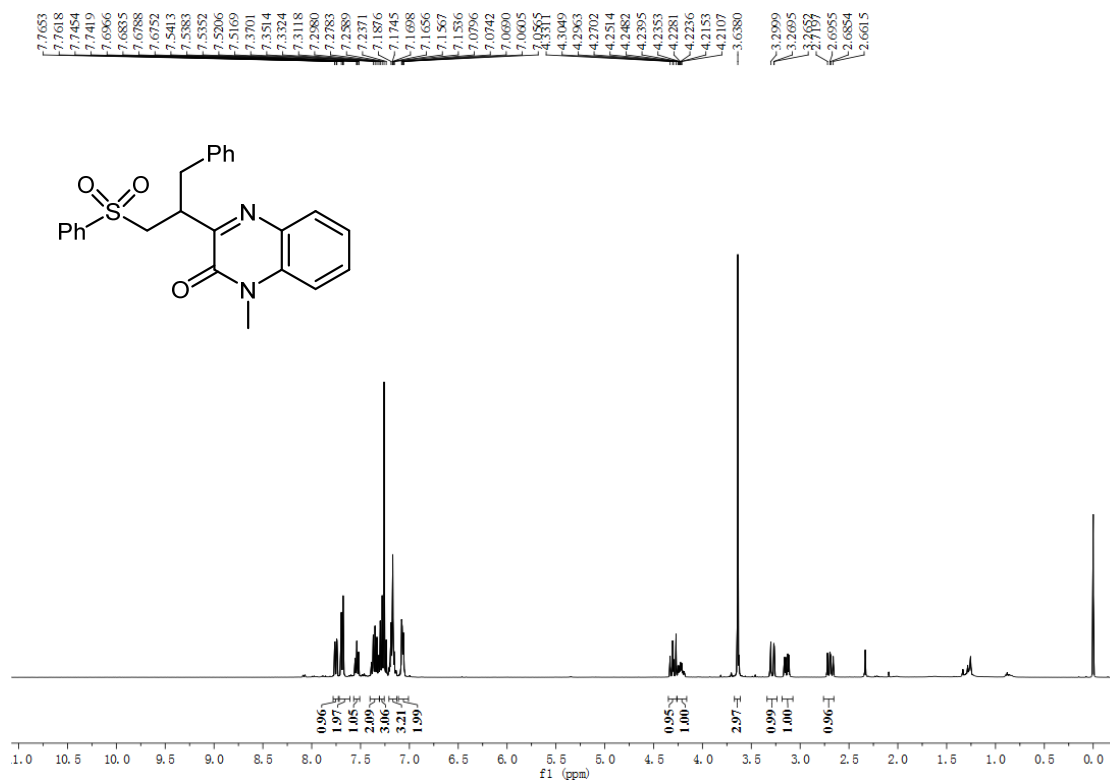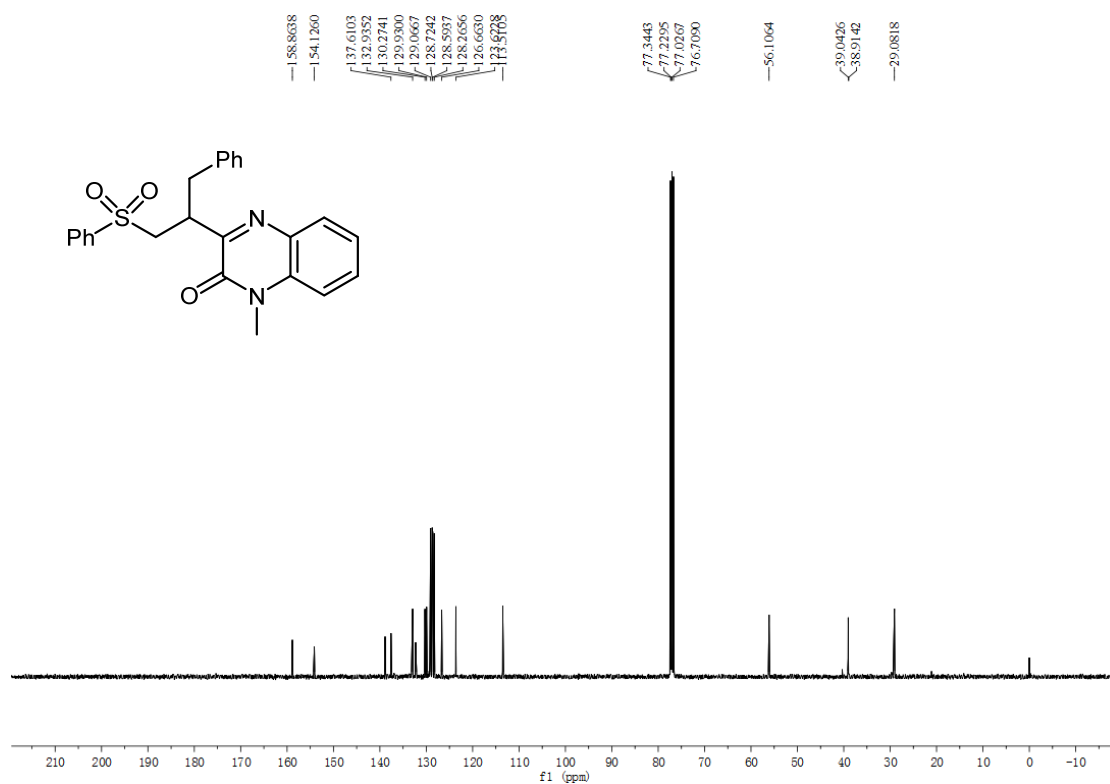



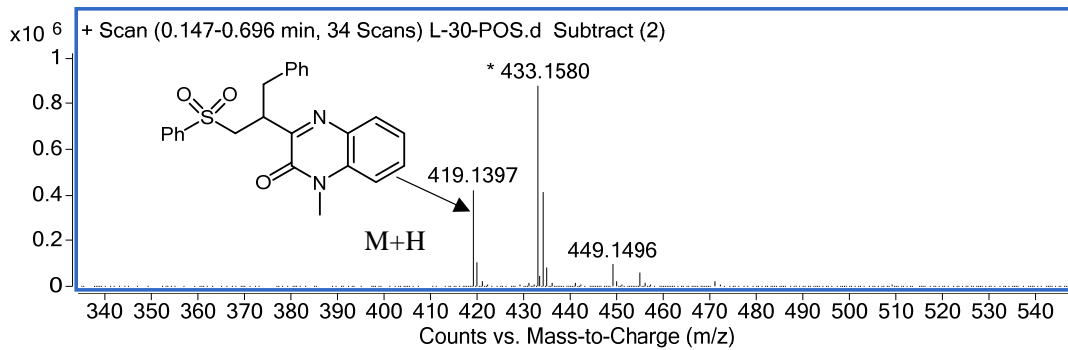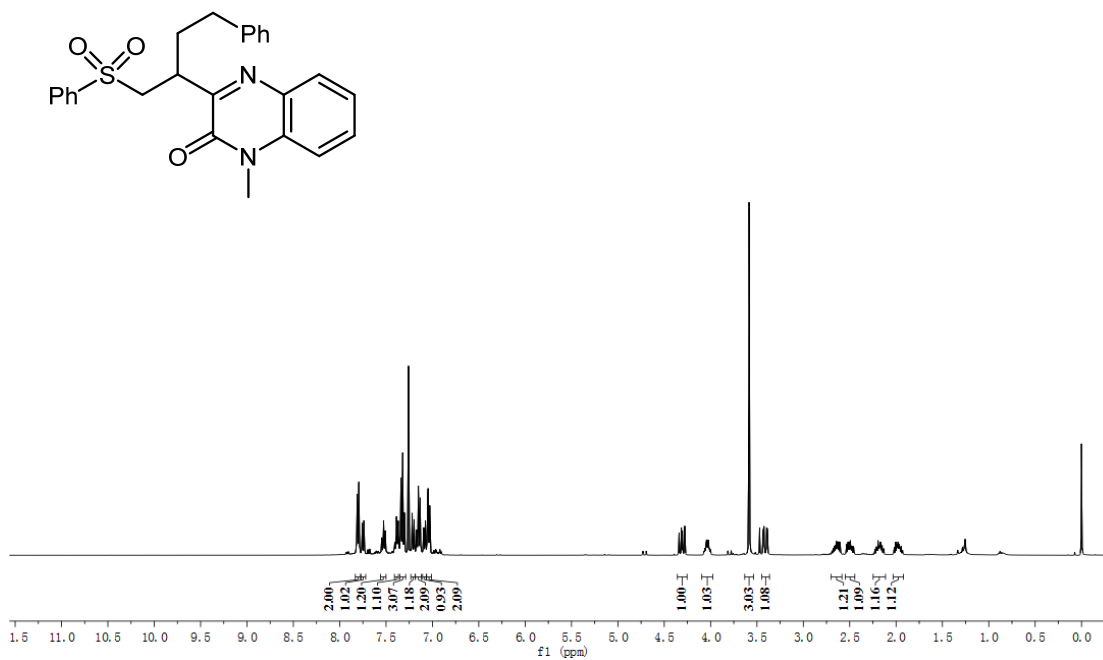

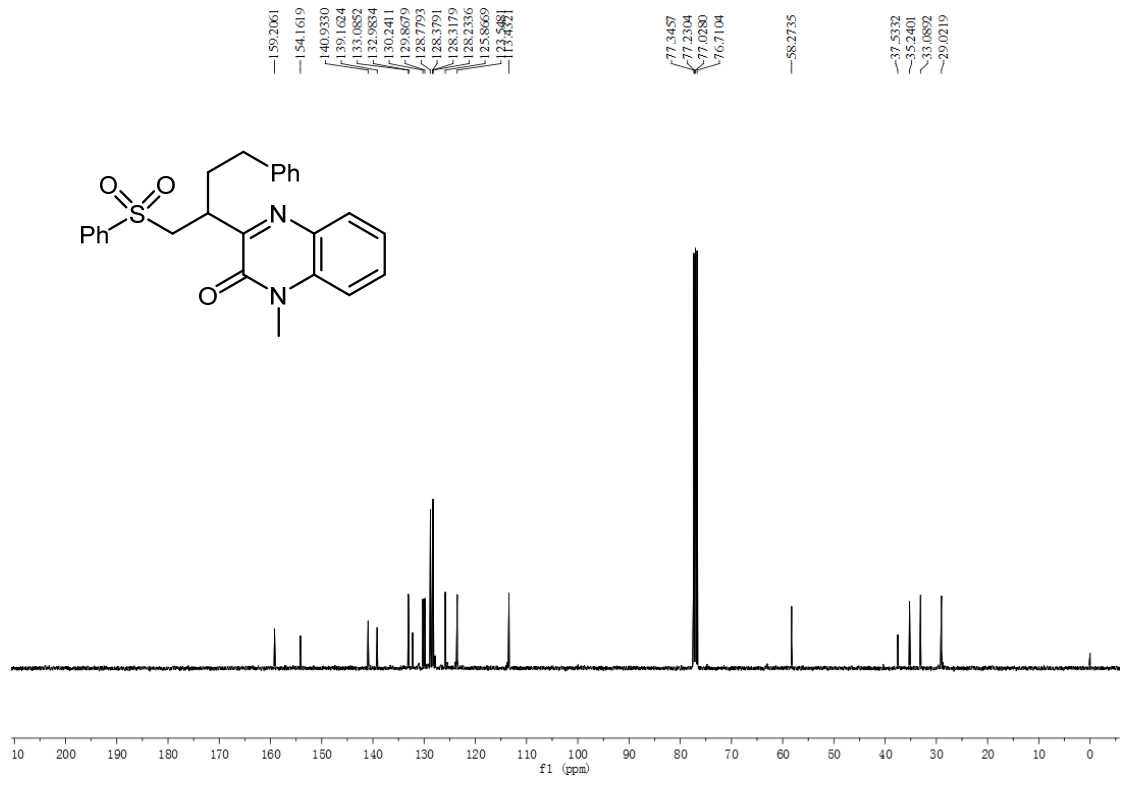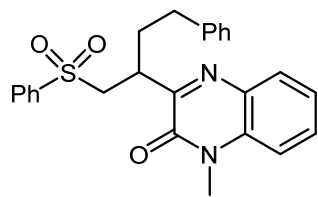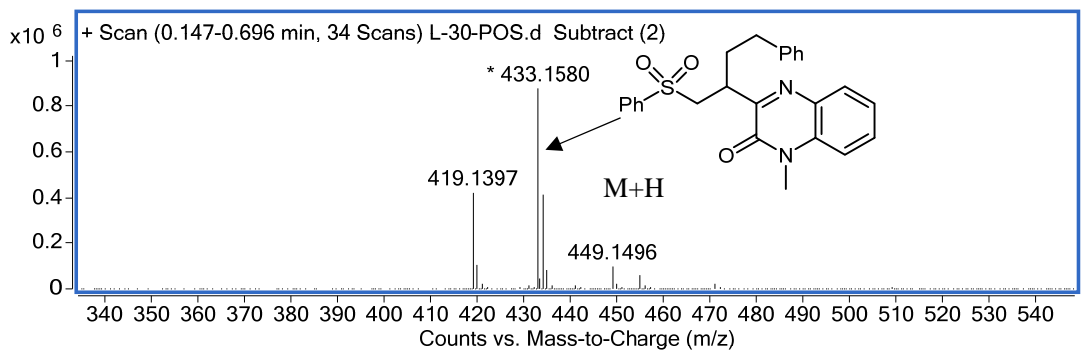

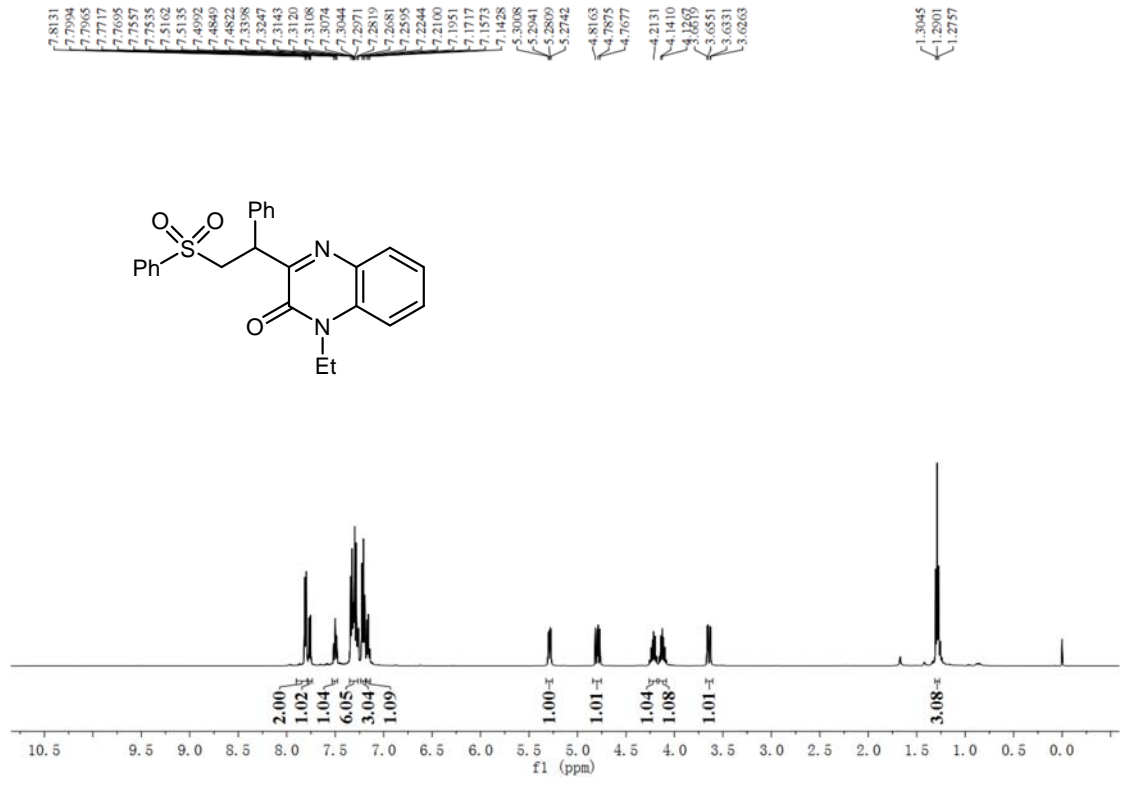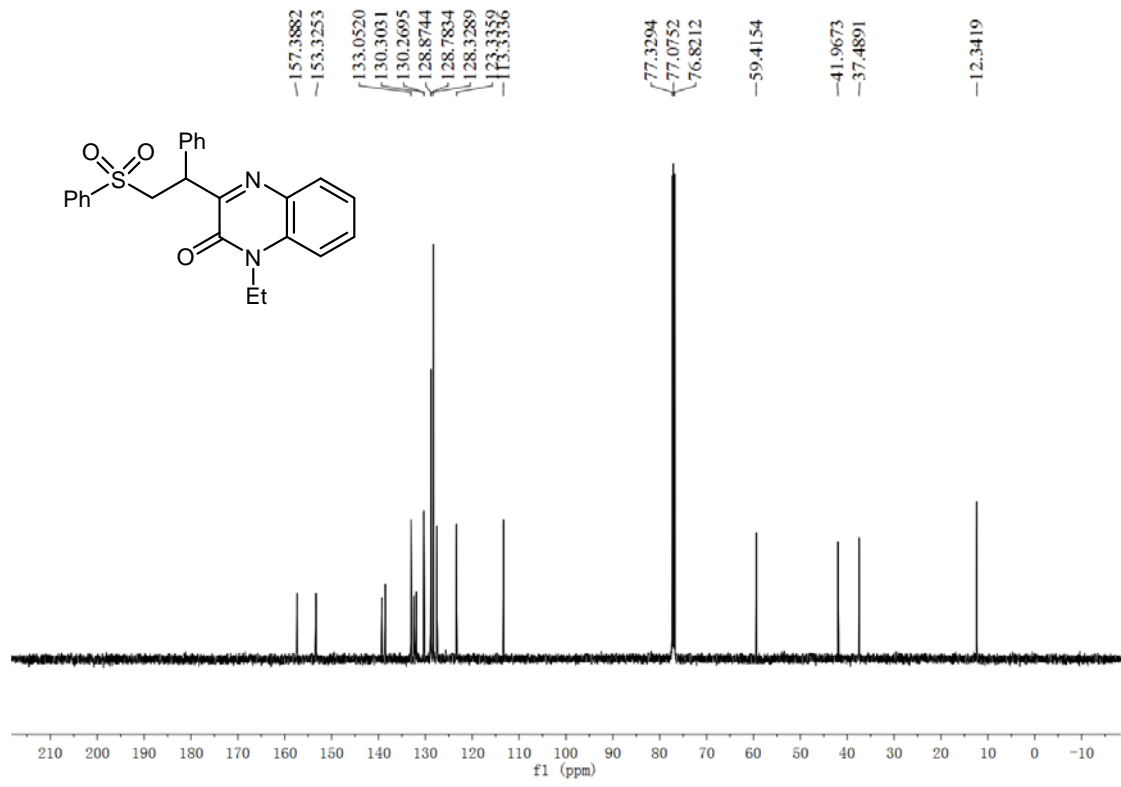

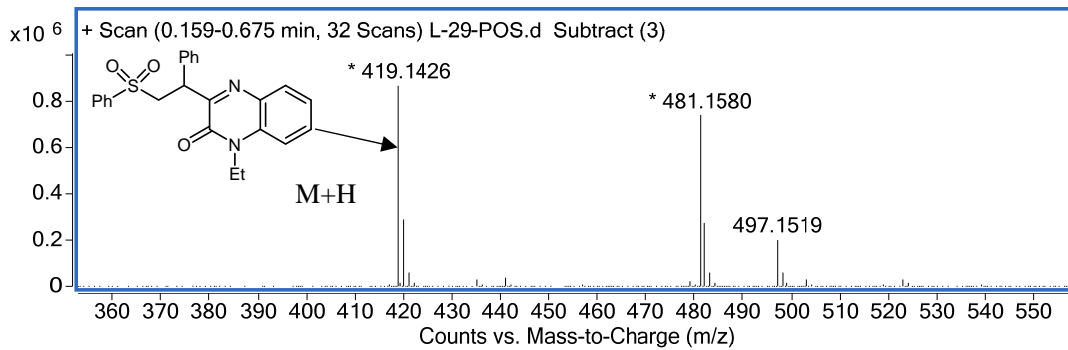

7.9471  
7.9288  
7.9286  
7.9286  
7.9285  
7.9285  
7.9281  
7.9211  
7.9182  
7.9182  
7.9018  
7.8977  
7.8721  
7.7688  
7.7531  
7.7489  
7.7352  
7.7346  
7.4970  
7.4951  
7.4757  
7.4757  
7.3358  
7.3310  
7.3310  
7.3244  
7.3136  
7.2944  
7.2775  
7.2598  
7.2237  
7.2073  
7.1880  
7.1710  
7.1535  
5.2964  
5.2878  
5.2717  
5.2631  
4.8139  
4.7911  
4.7800  
4.7553  
4.7379  
4.1817  
4.1750  
4.1641  
4.1389  
4.1484  
4.1402  
4.1244  
4.0714  
4.0563  
4.0476  
4.0325  
4.0212  
3.6630  
3.6544  
3.6271  
3.6185  
1.6906  
1.6707  
1.6514  
1.6370  
1.6329  
1.6090  
1.4380  
1.4395  
1.4208  
1.4019  
0.9917  
0.9734  
0.9550

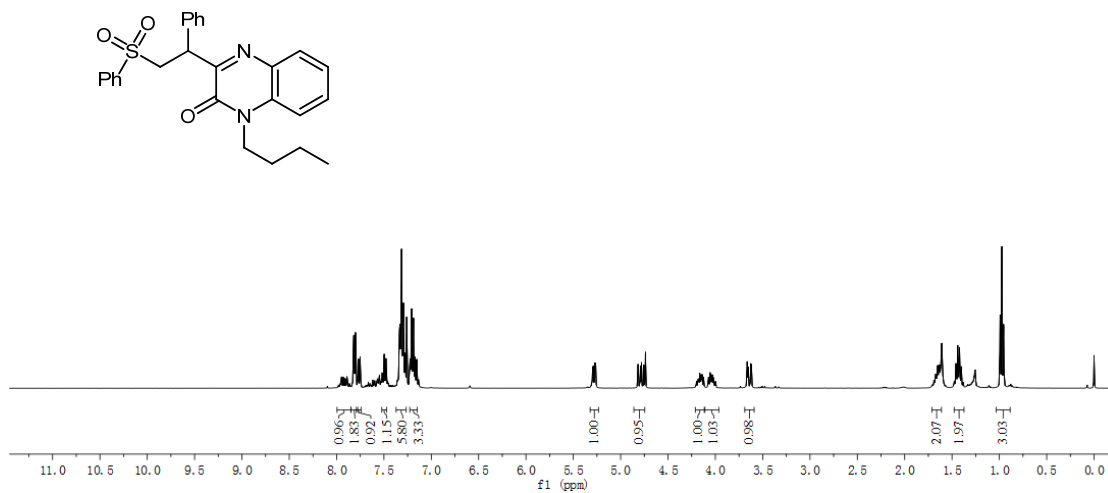

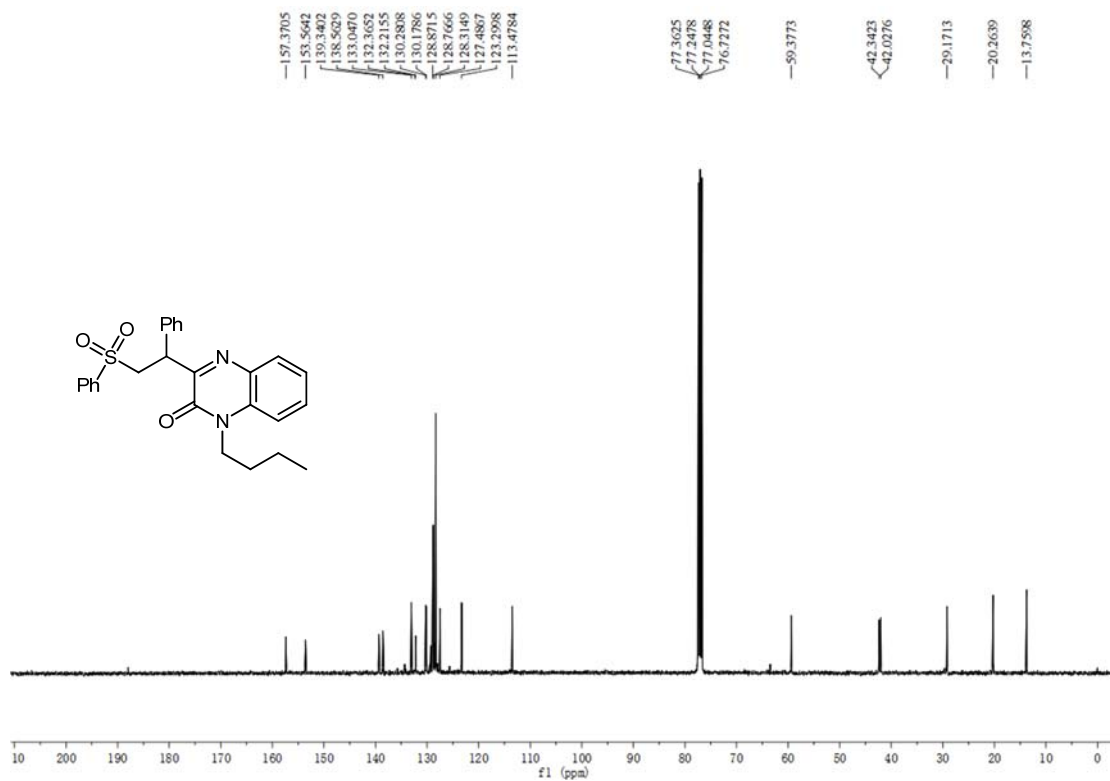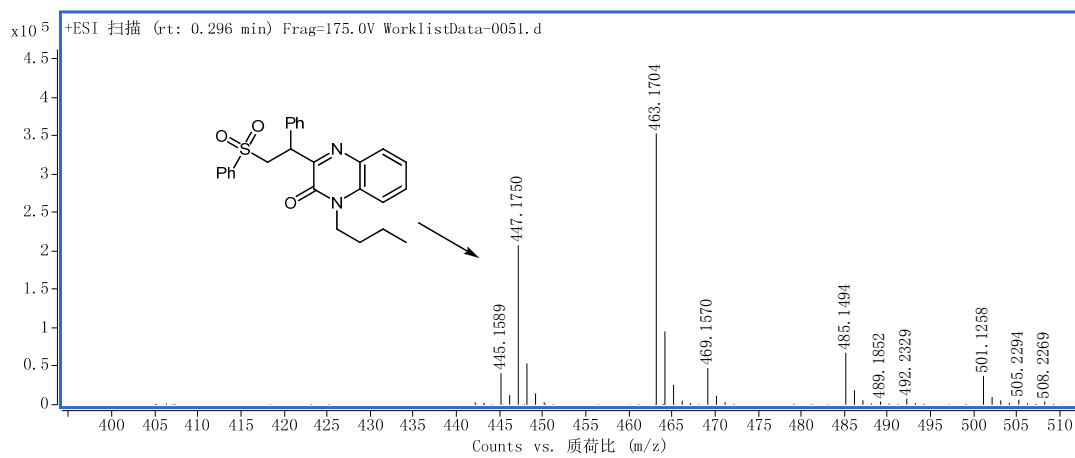

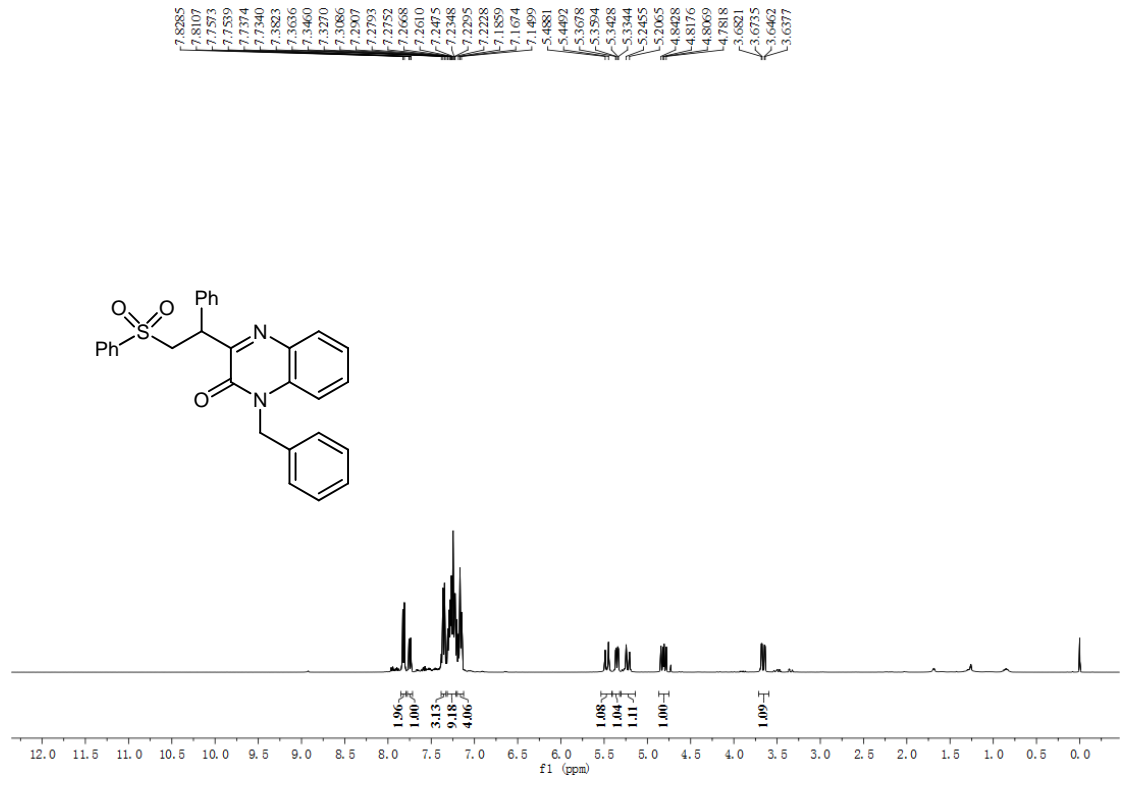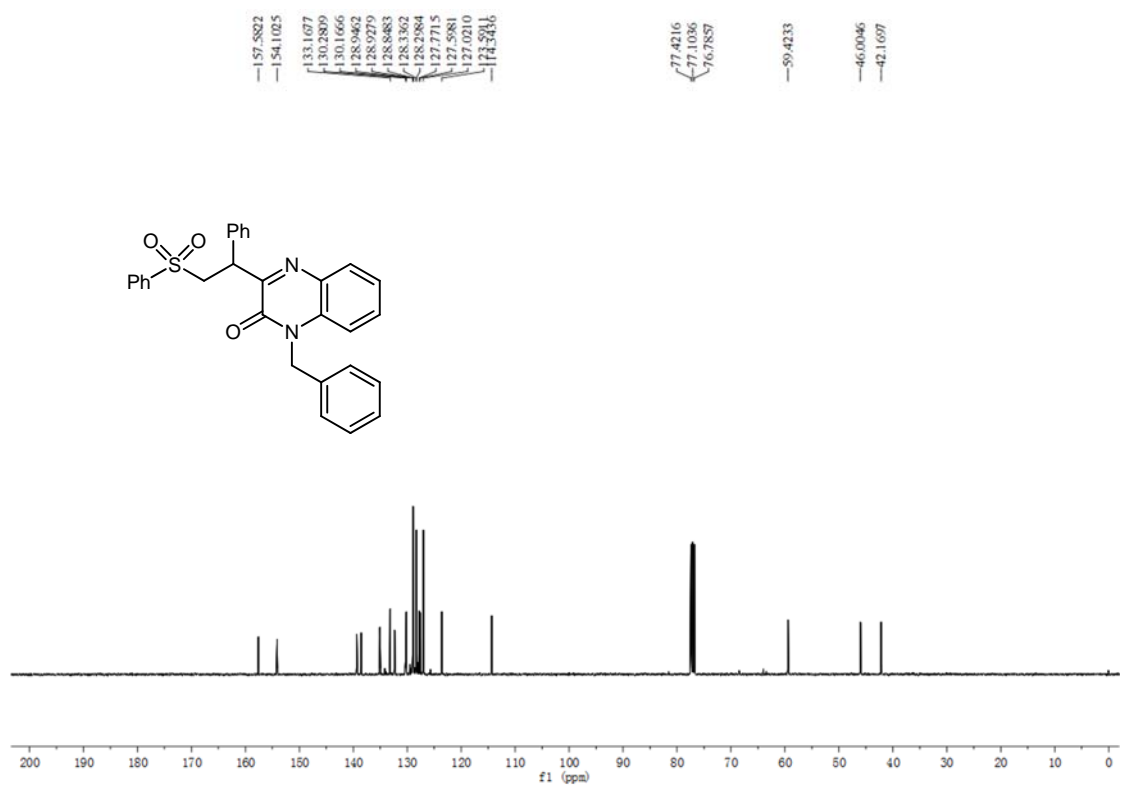

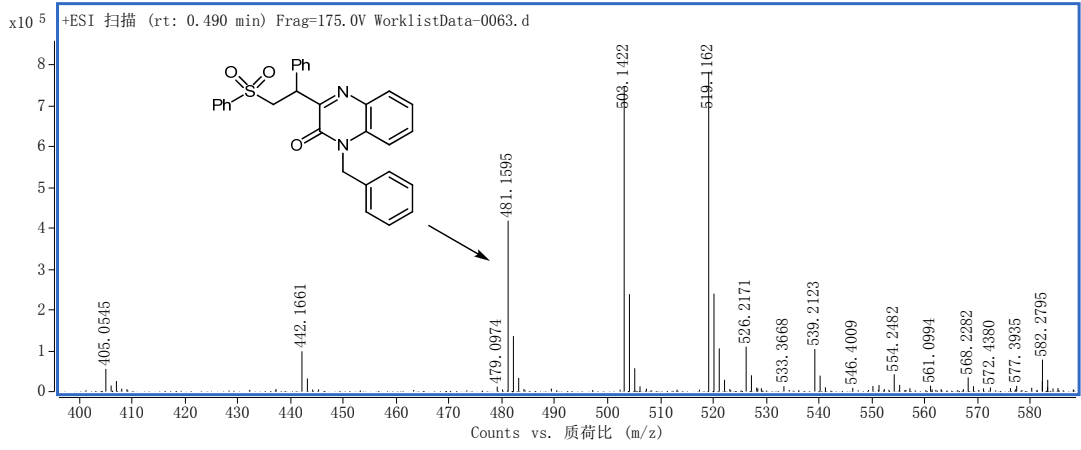

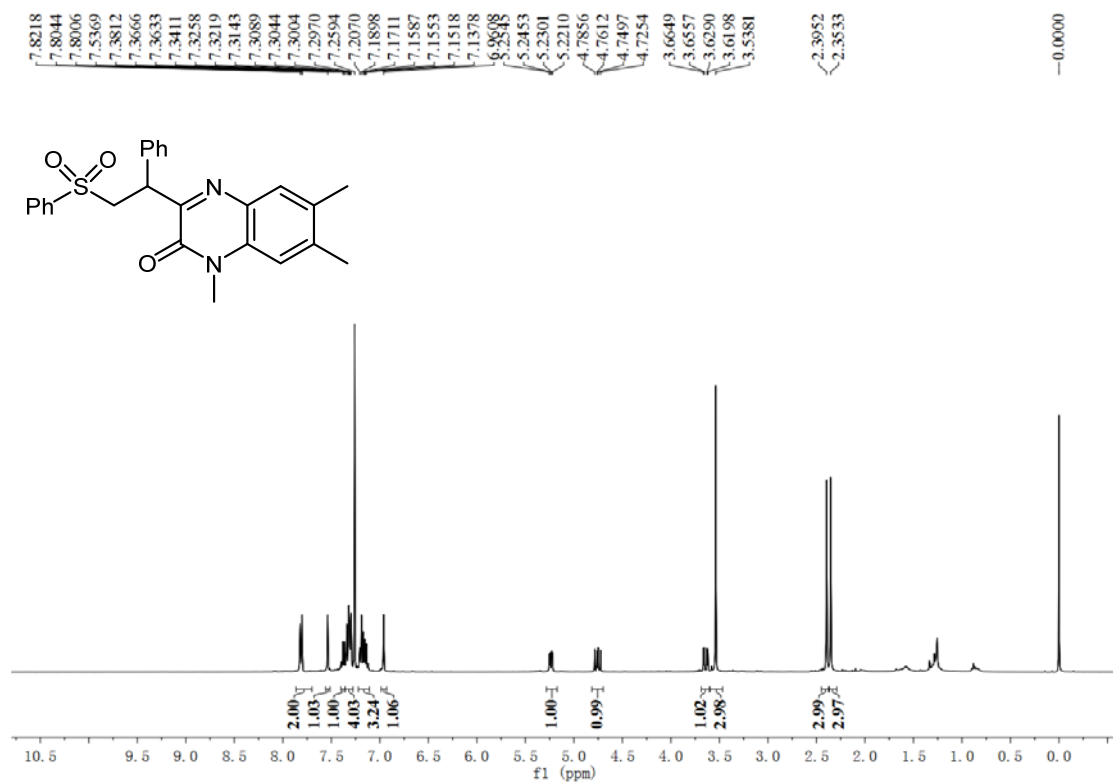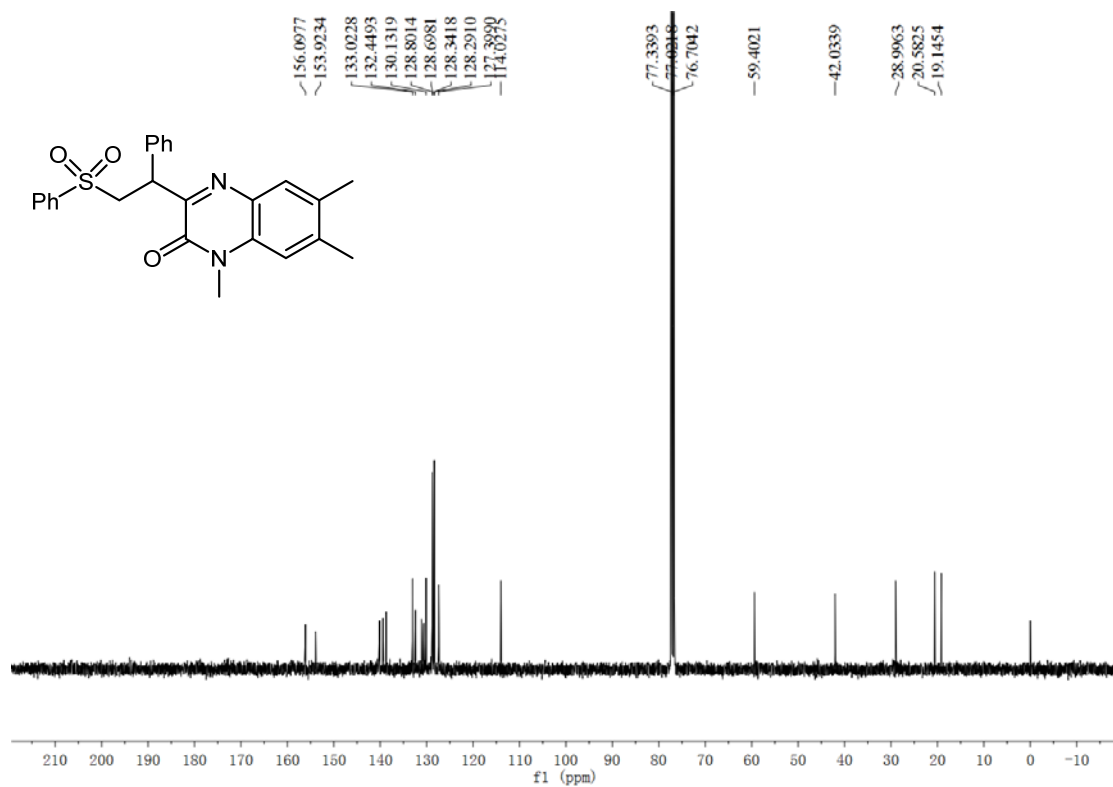



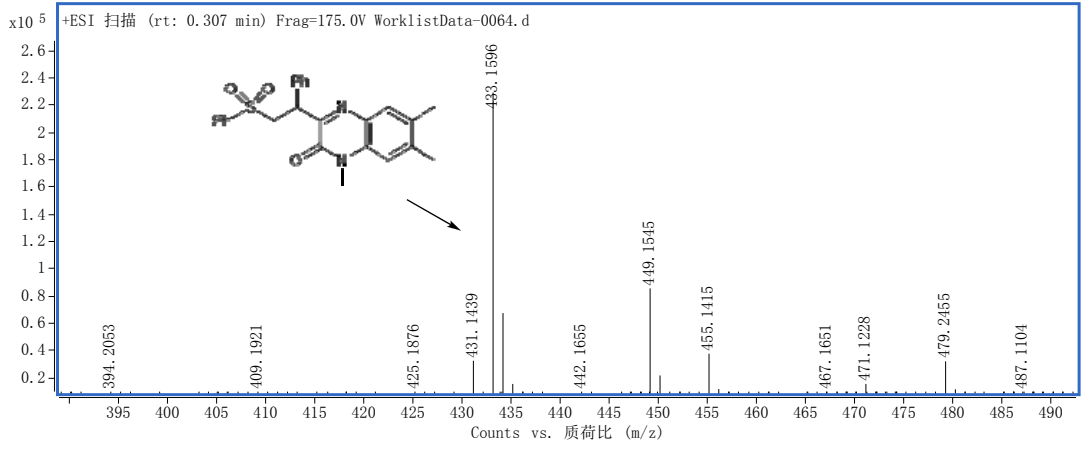

8.0377  
7.8399  
7.8224  
7.8189  
7.7477  
7.7437  
7.7259  
7.7219  
7.4391  
7.4290  
7.4145  
7.4032  
7.3876  
7.3685  
7.3513  
7.3470  
7.3345  
7.3227  
7.3170  
7.3030  
7.2883  
7.2479  
7.2442  
7.2272  
7.1953  
7.1868  
7.1780  
7.1700  
7.1600  
7.1516  
5.3305  
5.3227  
5.3046  
5.2967  
5.2881  
4.7291  
4.7493  
4.7233  
3.6513  
3.6453  
3.6162

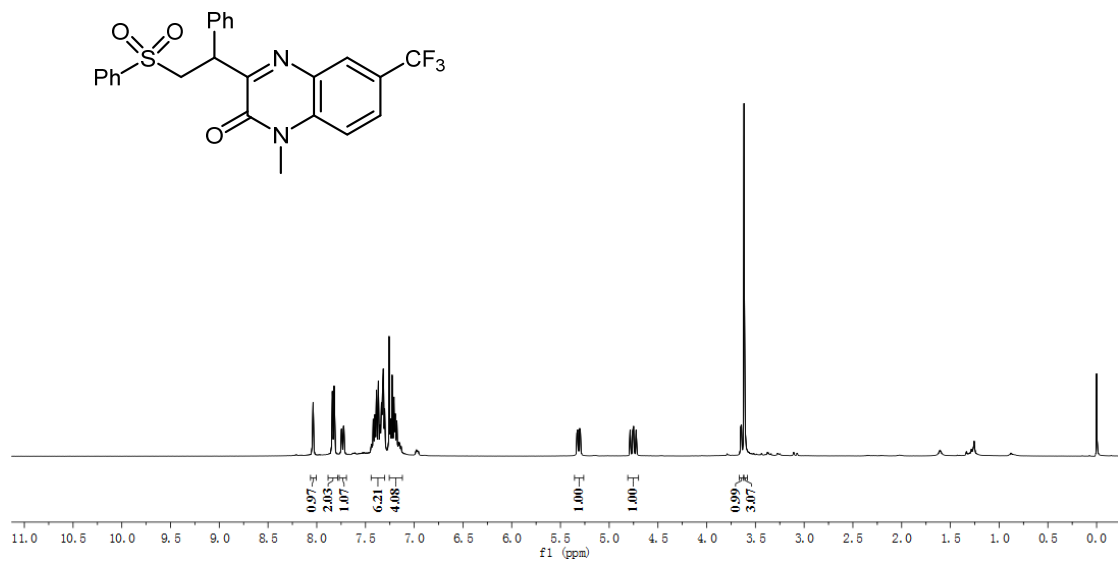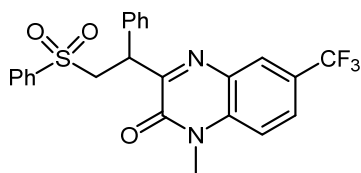

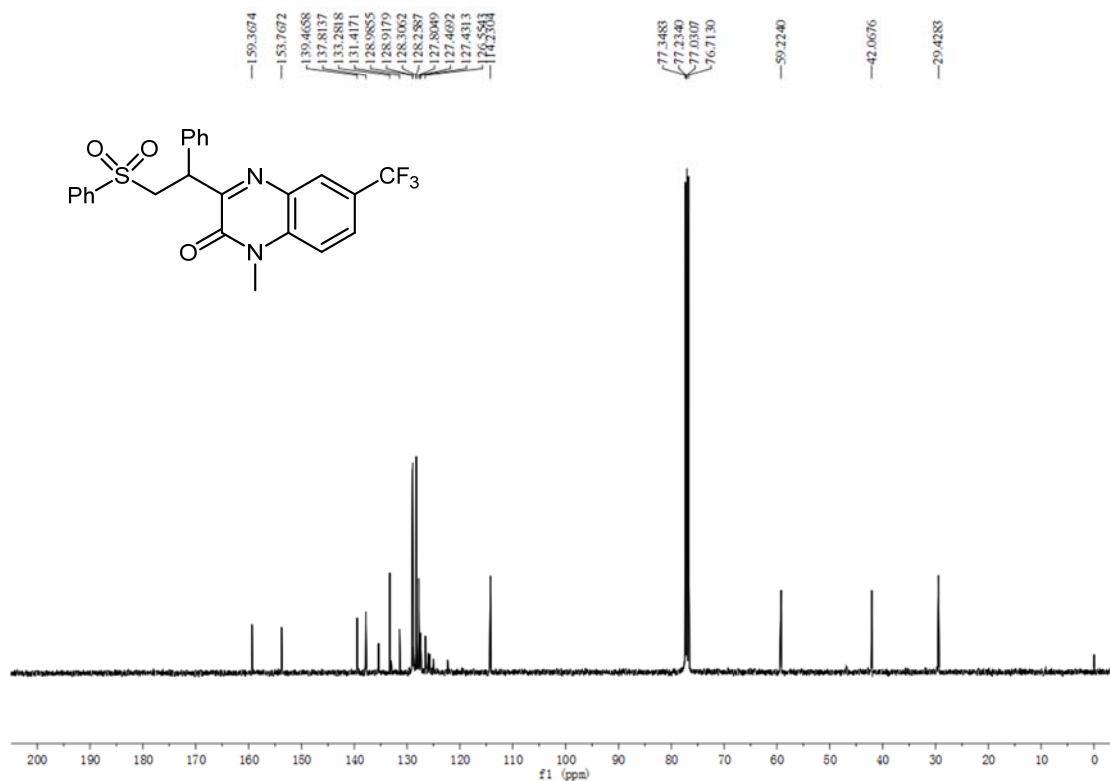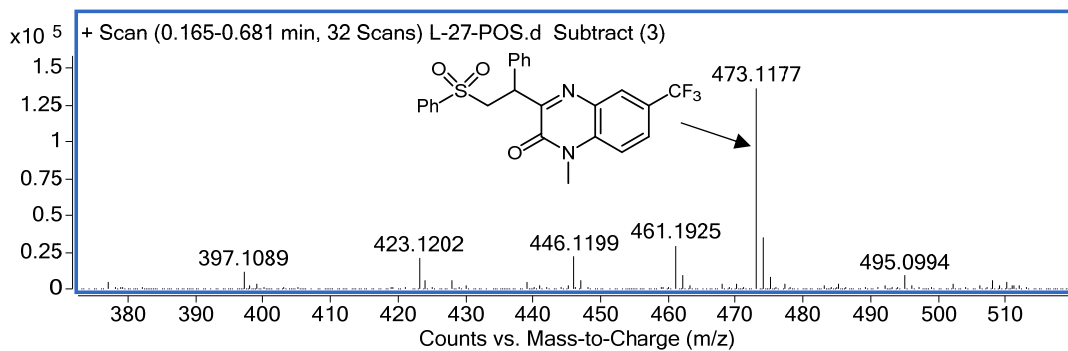

7.82669  
7.80884  
7.69882  
7.6771  
7.48833  
7.48112  
7.39988  
7.36883  
7.3502  
7.3390  
7.3146  
7.2965  
7.2839  
7.2608  
7.2280  
7.2101  
7.1937  
7.1814  
7.1630  
7.1457

5.2689  
5.2411

4.7742  
4.7479  
4.7397  
4.7131

3.6499  
3.6051  
3.5842  
3.5335

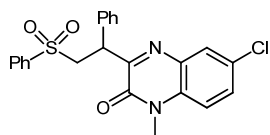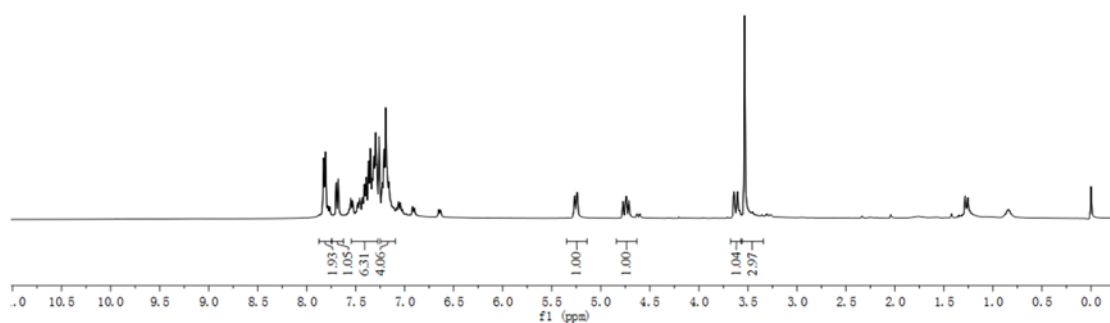

157.6367  
153.6324

139.3298  
138.1550  
136.2744  
133.9179  
133.2442  
131.0730  
128.9315  
128.8485  
128.3179  
128.2983  
127.6748  
123.9697

77.3818  
77.0640  
76.7462

59.2350

42.0635

29.2635

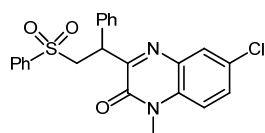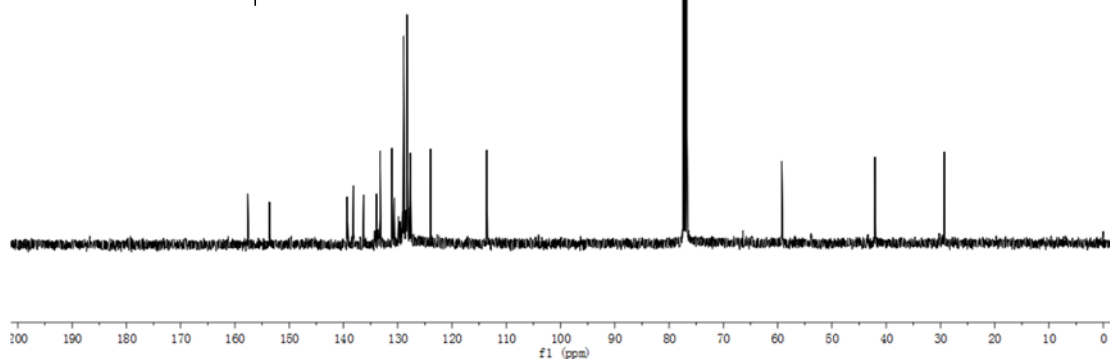

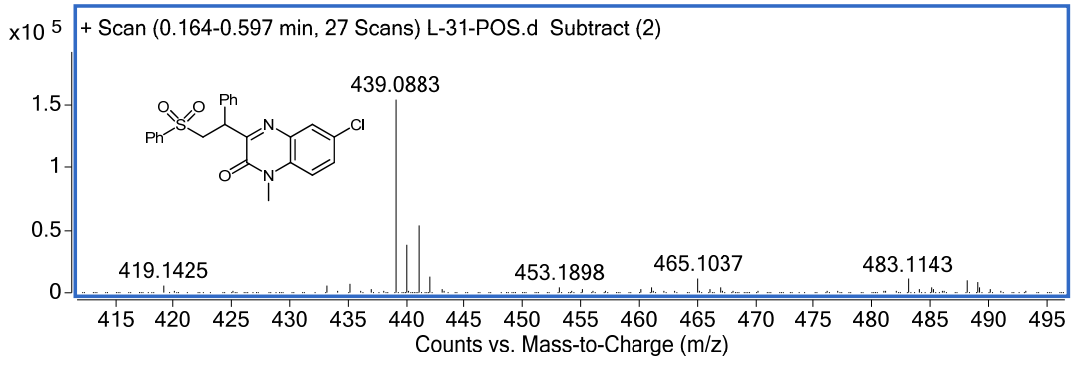

7.8363  
7.8241  
7.8192  
7.8153  
7.4913  
7.4841  
7.4697  
7.4626  
7.4112  
7.3972  
7.3937  
7.3900  
7.3788  
7.3638  
7.3600  
7.3429  
7.3301  
7.3263  
7.3090  
7.2711  
7.2680  
7.2387  
7.2486  
7.2413  
7.2356  
7.2315  
7.2144  
7.1957  
7.1822  
7.1710  
7.1640  
7.1605  
5.1885  
5.1825  
5.3000  
5.2748  
4.7805  
4.7550  
4.7447  
4.7192  
3.6487  
3.6403  
3.6129  
3.6045  
3.5752

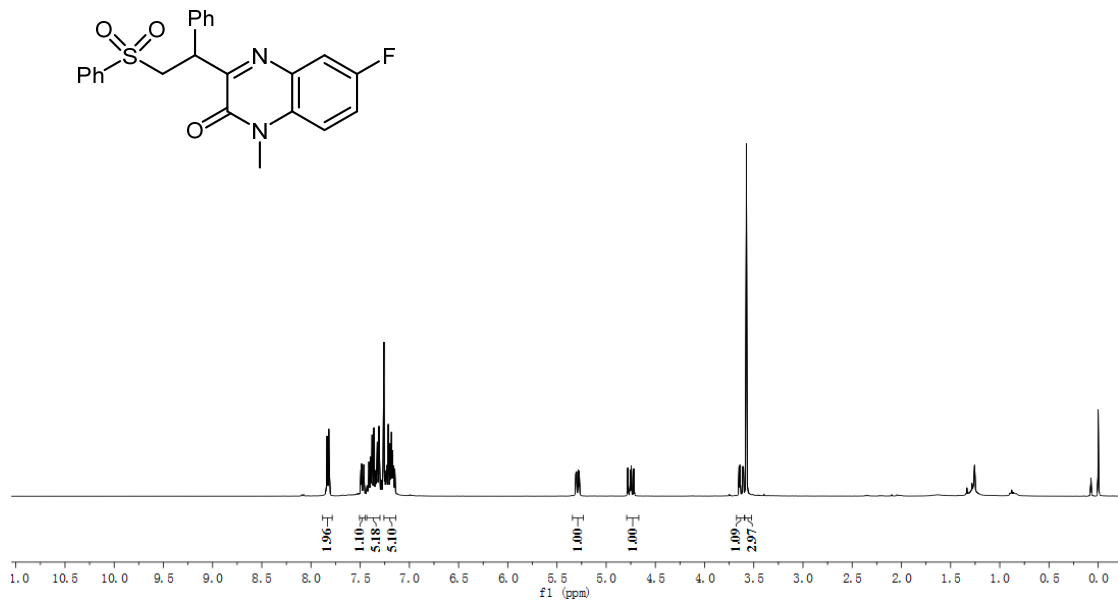

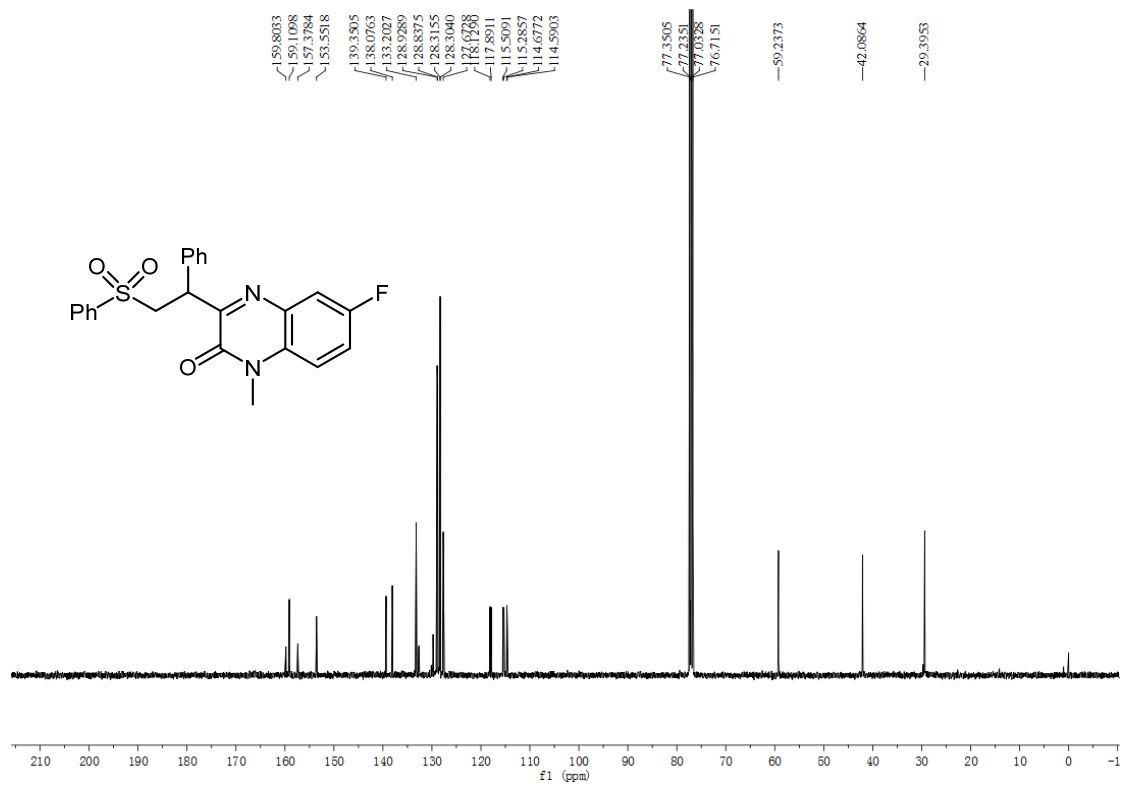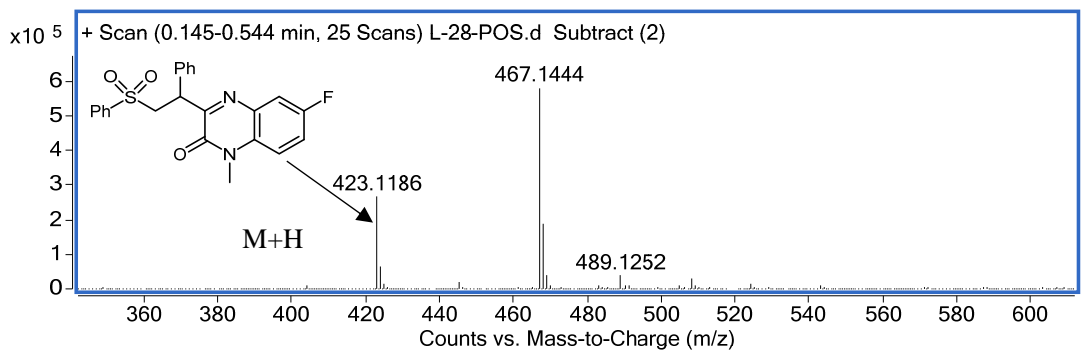

Supplement: d1qo00816a1.pdf [file d1qo00816a1.pdf]
